# Supplementary material for: Exploring the toxicological mechanisms of reduced fertility in dairy cows due to nonesterified fatty acids on the basis of network toxicology, transcriptomics and molecular docking
Source: Research Square preprint supplement (doi:10.21203/rs.3.rs-7524568/v1), 2025-10-08
Supplement: Supplementary file 1 [file 3a64649ab1f3ed81eae2c78f.docx]

**Table S4** Analysis of the 403 potential target genes via MCODE method.

| MCODE clusters | Targets | MCODE node status | MCODE score |
| --- | --- | --- | --- |
| Cluster 1 | ESR2 | Seed | 6.0 |
| PRKACA | Clustered | 6.0 |
| JUN | Clustered | 6.0 |
| ESR1 | Clustered | 6.0 |
| RPS6KB1 | Clustered | 6.0 |
| MAPK1 | Clustered | 6.0 |
| FOS | Clustered | 6.0 |
| Cluster 2 | SERPINC1 | Clustered | 3.0 |
| FGA | Seed | 3.0 |
| F2 | Clustered | 3.0 |
| PLG | Clustered | 3.0 |
| Cluster 3 | ALDH4A1 | Clustered | 3.0 |
| GLUL | Seed | 3.0 |
| GLUD1 | Clustered | 3.0 |
| GAD1 | Clustered | 3.0 |
| Cluster 4 | RAC2 | Clustered | 1.7 |
| ITGB1 | Clustered | 1.7 |
| RAF1 | Clustered | 1.7 |
| PIK3R1 | Clustered | 1.7 |
| TLR4 | Seed | 2.1 |
| PIK3CA | Clustered | 1.7 |
| Cluster 5 | COL3A1 | Clustered | 3.0 |
| SMAD2 | Clustered | 3.0 |
| TLR2 | Clustered | 2.7 |
| CHUK | Clustered | 3.0 |
| IKBKB | Clustered | 3.0 |
| ICAM1 | Clustered | 3.0 |
| COL1A1 | Clustered | 3.0 |
| MMP2 | Clustered | 3.0 |
| COL1A2 | Clustered | 3.0 |
| SMAD4 | Clustered | 3.0 |
| TNFRSF1A | Clustered | 3.0 |
| TGFBR1 | Clustered | 3.0 |
| IL6 | Seed | 3.0 |
| MMP9 | Clustered | 3.0 |
| MYD88 | Clustered | 3.0 |
| CD44 | Clustered | 3.0 |
| TGFB1 | Clustered | 3.0 |
| Cluster 6 | PRKCB | Seed | 2.3 |
| PRKCG | Clustered | 2.3 |
| PRKCA | Clustered | 2.3 |
| Cluster 7 | TP53 | Seed | 2.2 |
| SLC2A1 | Clustered | 2.0 |
| SLC2A2 | Clustered | 2.0 |
| Cluster 8 | PARK7 | Clustered | 2.0 |
| SOD2 | Seed | 2.0 |
| SOD1 | Clustered | 2.0 |
| Cluster 9 | ADRB2 | Seed | 2.0 |
| ADRB1 | Clustered | 2.0 |
| GNAS | Clustered | 2.0 |
| Cluster 10 | FASN | Clustered | 2.0 |
| SCD | Seed | 2.0 |
| ACACA | Clustered | 2.0 |
| Cluster 11 | EDNRB | Clustered | 1.4 |
| EDN1 | Clustered | 1.2 |
| EDNRA | Seed | 1.4 |
| Cluster 12 | AKT1 | Seed | 1.3 |
| HSP90AB1 | Clustered | 1.2 |
| HSP90AA1 | Clustered | 1.2 |

The values of MCODE score are saved to one digit after the decimal point.
