# Supplementary material for: Exploring the toxicological mechanisms of reduced fertility in dairy cows due to nonesterified fatty acids on the basis of network toxicology, transcriptomics and molecular docking
Source: Research Square preprint supplement (doi:10.21203/rs.3.rs-7524568/v1), 2025-10-08
Supplement: Supplementary file 2 [file 4b90d510988a8c0e4710168a.docx]

**Table S5** Results of GO and KEGG enrichment analyses

| Enrichment term | ID | Description | Gene ratio | FDR | Count |
| --- | --- | --- | --- | --- | --- |
| GO (BP) | GO:0019752 | carboxylic acid metabolic process | 34/365 | 8.46E-08 | 34 |
|  | GO:0043436 | oxoacid metabolic process | 34/365 | 8.46E-08 | 34 |
|  | GO:0006082 | organic acid metabolic process | 34/365 | 2.54E-07 | 34 |
|  | GO:0044283 | small molecule biosynthetic process | 19/365 | 0.000179 | 19 |
|  | GO:0061041 | regulation of wound healing | 6/365 | 0.000179 | 6 |
|  | GO:0016053 | organic acid biosynthetic process | 14/365 | 0.000179 | 14 |
|  | GO:0046394 | carboxylic acid biosynthetic process | 14/365 | 0.000179 | 14 |
|  | GO:0030193 | regulation of blood coagulation | 5/365 | 0.000179 | 5 |
|  | GO:1900046 | regulation of hemostasis | 5/365 | 0.000179 | 5 |
|  | GO:0009719 | response to endogenous stimulus | 22/365 | 0.000179 | 22 |
|  | GO:0051604 | protein maturation | 22/365 | 0.000188 | 22 |
|  | GO:1903034 | regulation of response to wounding | 6/365 | 0.000188 | 6 |
|  | GO:0009725 | response to hormone | 14/365 | 0.000214 | 14 |
|  | GO:1901605 | alpha-amino acid metabolic process | 14/365 | 0.00032 | 14 |
|  | GO:0170039 | proteinogenic amino acid metabolic process | 12/365 | 0.000361 | 12 |
|  | GO:0050818 | regulation of coagulation | 5/365 | 0.00038 | 5 |
|  | GO:0006520 | amino acid metabolic process | 17/365 | 0.000426 | 17 |
|  | GO:0006954 | inflammatory response | 16/365 | 0.000426 | 16 |
|  | GO:0032787 | monocarboxylic acid metabolic process | 18/365 | 0.000426 | 18 |
|  | GO:1901700 | response to oxygen-containing compound | 17/365 | 0.000426 | 17 |
|  | GO:0080134 | regulation of response to stress | 16/365 | 0.000426 | 16 |
|  | GO:0008217 | regulation of blood pressure | 7/365 | 0.000462 | 7 |
|  | GO:0016485 | protein processing | 10/365 | 0.00048 | 10 |
|  | GO:0032101 | regulation of response to external stimulus | 15/365 | 0.000551 | 15 |
|  | GO:0170033 | L-amino acid metabolic process | 12/365 | 0.000616 | 12 |
|  | GO:0007596 | blood coagulation | 8/365 | 0.000616 | 8 |
|  | GO:0007599 | hemostasis | 8/365 | 0.000616 | 8 |
|  | GO:0009112 | nucleobase metabolic process | 6/365 | 0.000616 | 6 |
|  | GO:0008015 | blood circulation | 11/365 | 0.000616 | 11 |
|  | GO:0060396 | growth hormone receptor signaling pathway | 4/365 | 0.000616 | 4 |
|  | GO:0060416 | response to growth hormone | 4/365 | 0.000616 | 4 |
|  | GO:0061045 | negative regulation of wound healing | 4/365 | 0.000616 | 4 |
|  | GO:0071378 | cellular response to growth hormone stimulus | 4/365 | 0.000616 | 4 |
|  | GO:1903035 | negative regulation of response to wounding | 4/365 | 0.000616 | 4 |
|  | GO:0003013 | circulatory system process | 11/365 | 0.000625 | 11 |
|  | GO:0009064 | glutamine family amino acid metabolic process | 6/365 | 0.000686 | 6 |
|  | GO:0050817 | coagulation | 8/365 | 0.000694 | 8 |
|  | GO:0001504 | neurotransmitter uptake | 3/365 | 0.000694 | 3 |
|  | GO:0098810 | neurotransmitter reuptake | 3/365 | 0.000694 | 3 |
|  | GO:0071495 | cellular response to endogenous stimulus | 19/365 | 0.00098 | 19 |
|  | GO:0042060 | wound healing | 9/365 | 0.001174 | 9 |
|  | GO:0009132 | nucleoside diphosphate metabolic process | 7/365 | 0.001524 | 7 |
|  | GO:0044282 | small molecule catabolic process | 13/365 | 0.001775 | 13 |
|  | GO:0009185 | ribonucleoside diphosphate metabolic process | 6/365 | 0.001897 | 6 |
|  | GO:0009611 | response to wounding | 9/365 | 0.001898 | 9 |
|  | GO:0043434 | response to peptide hormone | 9/365 | 0.001898 | 9 |
|  | GO:0060397 | growth hormone receptor signaling pathway via JAK-STAT | 3/365 | 0.002264 | 3 |
|  | GO:0009065 | glutamine family amino acid catabolic process | 4/365 | 0.002428 | 4 |
|  | GO:0032870 | cellular response to hormone stimulus | 11/365 | 0.002428 | 11 |
|  | GO:0006979 | response to oxidative stress | 8/365 | 0.002807 | 8 |
|  | GO:0071375 | cellular response to peptide hormone stimulus | 8/365 | 0.002807 | 8 |
|  | GO:1901699 | cellular response to nitrogen compound | 10/365 | 0.002932 | 10 |
|  | GO:0046189 | phenol-containing compound biosynthetic process | 4/365 | 0.003459 | 4 |
|  | GO:1901701 | cellular response to oxygen-containing compound | 13/365 | 0.003463 | 13 |
|  | GO:0032102 | negative regulation of response to external stimulus | 7/365 | 0.004357 | 7 |
|  | GO:0072523 | purine-containing compound catabolic process | 7/365 | 0.004357 | 7 |
|  | GO:0050878 | regulation of body fluid levels | 8/365 | 0.004357 | 8 |
|  | GO:0006809 | nitric oxide biosynthetic process | 3/365 | 0.004357 | 3 |
|  | GO:0031639 | plasminogen activation | 3/365 | 0.004357 | 3 |
|  | GO:0046209 | nitric oxide metabolic process | 3/365 | 0.004357 | 3 |
|  | GO:0006144 | purine nucleobase metabolic process | 4/365 | 0.004424 | 4 |
|  | GO:0006801 | superoxide metabolic process | 5/365 | 0.004508 | 5 |
|  | GO:0007167 | enzyme-linked receptor protein signaling pathway | 20/365 | 0.00488 | 20 |
|  | GO:0002224 | toll-like receptor signaling pathway | 5/365 | 0.005472 | 5 |
|  | GO:0006525 | arginine metabolic process | 4/365 | 0.005885 | 4 |
|  | GO:0045944 | positive regulation of transcription by RNA polymerase II | 14/365 | 0.006302 | 14 |
|  | GO:0006936 | muscle contraction | 8/365 | 0.006567 | 8 |
|  | GO:0006631 | fatty acid metabolic process | 12/365 | 0.006654 | 12 |
|  | GO:0008652 | amino acid biosynthetic process | 7/365 | 0.006654 | 7 |
|  | GO:0035150 | regulation of tube size | 6/365 | 0.006654 | 6 |
|  | GO:0035296 | regulation of tube diameter | 6/365 | 0.006654 | 6 |
|  | GO:0097746 | blood vessel diameter maintenance | 6/365 | 0.006654 | 6 |
|  | GO:0003085 | negative regulation of systemic arterial blood pressure | 3/365 | 0.006654 | 3 |
|  | GO:0007613 | memory | 3/365 | 0.006654 | 3 |
|  | GO:0030195 | negative regulation of blood coagulation | 3/365 | 0.006654 | 3 |
|  | GO:0045776 | negative regulation of blood pressure | 3/365 | 0.006654 | 3 |
|  | GO:1900047 | negative regulation of hemostasis | 3/365 | 0.006654 | 3 |
|  | GO:0031638 | zymogen activation | 4/365 | 0.006654 | 4 |
|  | GO:0051402 | neuron apoptotic process | 4/365 | 0.006654 | 4 |
|  | GO:0003012 | muscle system process | 8/365 | 0.006718 | 8 |
|  | GO:0046434 | organophosphate catabolic process | 9/365 | 0.007506 | 9 |
|  | GO:0055086 | nucleobase-containing small molecule metabolic process | 18/365 | 0.008167 | 18 |
|  | GO:0170041 | non-proteinogenic amino acid metabolic process | 6/365 | 0.009042 | 6 |
|  | GO:0009135 | purine nucleoside diphosphate metabolic process | 5/365 | 0.009042 | 5 |
|  | GO:0009179 | purine ribonucleoside diphosphate metabolic process | 5/365 | 0.009042 | 5 |
|  | GO:0046031 | ADP metabolic process | 5/365 | 0.009042 | 5 |
|  | GO:0003018 | vascular process in circulatory system | 6/365 | 0.009923 | 6 |
|  | GO:0007611 | learning or memory | 3/365 | 0.009923 | 3 |
|  | GO:2001057 | reactive nitrogen species metabolic process | 3/365 | 0.009923 | 3 |
|  | GO:0006915 | apoptotic process | 20/365 | 0.010412 | 20 |
|  | GO:0072330 | monocarboxylic acid biosynthetic process | 7/365 | 0.010412 | 7 |
|  | GO:0072593 | reactive oxygen species metabolic process | 6/365 | 0.011101 | 6 |
|  | GO:0001963 | synaptic transmission, dopaminergic | 2/365 | 0.011101 | 2 |
|  | GO:0006581 | acetylcholine catabolic process | 2/365 | 0.011101 | 2 |
|  | GO:0009188 | ribonucleoside diphosphate biosynthetic process | 2/365 | 0.011101 | 2 |
|  | GO:0015874 | norepinephrine transport | 2/365 | 0.011101 | 2 |
|  | GO:0019371 | cyclooxygenase pathway | 2/365 | 0.011101 | 2 |
|  | GO:0048668 | collateral sprouting | 2/365 | 0.011101 | 2 |
|  | GO:0048670 | regulation of collateral sprouting | 2/365 | 0.011101 | 2 |
|  | GO:0048672 | positive regulation of collateral sprouting | 2/365 | 0.011101 | 2 |
|  | GO:0051583 | dopamine uptake involved in synaptic transmission | 2/365 | 0.011101 | 2 |
|  | GO:0051934 | catecholamine uptake involved in synaptic transmission | 2/365 | 0.011101 | 2 |
|  | GO:0090493 | catecholamine uptake | 2/365 | 0.011101 | 2 |
|  | GO:0090494 | dopamine uptake | 2/365 | 0.011101 | 2 |
|  | GO:0012501 | programmed cell death | 20/365 | 0.011356 | 20 |
|  | GO:0008219 | cell death | 20/365 | 0.011633 | 20 |
|  | GO:0006584 | catecholamine metabolic process | 3/365 | 0.012508 | 3 |
|  | GO:0006636 | unsaturated fatty acid biosynthetic process | 3/365 | 0.012508 | 3 |
|  | GO:0009712 | catechol-containing compound metabolic process | 3/365 | 0.012508 | 3 |
|  | GO:0050819 | negative regulation of coagulation | 3/365 | 0.012508 | 3 |
|  | GO:0097164 | ammonium ion metabolic process | 3/365 | 0.012508 | 3 |
|  | GO:0070887 | cellular response to chemical stimulus | 20/365 | 0.012993 | 20 |
|  | GO:0006939 | smooth muscle contraction | 4/365 | 0.013081 | 4 |
|  | GO:0008637 | apoptotic mitochondrial changes | 4/365 | 0.013081 | 4 |
|  | GO:0002221 | pattern recognition receptor signaling pathway | 5/365 | 0.013172 | 5 |
|  | GO:0006633 | fatty acid biosynthetic process | 6/365 | 0.013708 | 6 |
|  | GO:0071356 | cellular response to tumor necrosis factor | 6/365 | 0.013708 | 6 |
|  | GO:0170034 | L-amino acid biosynthetic process | 6/365 | 0.013708 | 6 |
|  | GO:0170038 | proteinogenic amino acid biosynthetic process | 6/365 | 0.013708 | 6 |
|  | GO:0007169 | cell surface receptor protein tyrosine kinase signaling pathway | 14/365 | 0.016502 | 14 |
|  | GO:0016052 | carbohydrate catabolic process | 6/365 | 0.016502 | 6 |
|  | GO:0043523 | regulation of neuron apoptotic process | 3/365 | 0.016502 | 3 |
|  | GO:0043524 | negative regulation of neuron apoptotic process | 3/365 | 0.016502 | 3 |
|  | GO:0050890 | cognition | 3/365 | 0.016502 | 3 |
|  | GO:0016042 | lipid catabolic process | 10/365 | 0.017737 | 10 |
|  | GO:0003073 | regulation of systemic arterial blood pressure | 4/365 | 0.017737 | 4 |
|  | GO:1901607 | alpha-amino acid biosynthetic process | 6/365 | 0.017737 | 6 |
|  | GO:0071345 | cellular response to cytokine stimulus | 14/365 | 0.017737 | 14 |
|  | GO:0007179 | transforming growth factor beta receptor signaling pathway | 5/365 | 0.017737 | 5 |
|  | GO:0009134 | nucleoside diphosphate catabolic process | 5/365 | 0.017737 | 5 |
|  | GO:0071559 | response to transforming growth factor beta | 5/365 | 0.017737 | 5 |
|  | GO:0071560 | cellular response to transforming growth factor beta stimulus | 5/365 | 0.017737 | 5 |
|  | GO:0044248 | cellular catabolic process | 19/365 | 0.019986 | 19 |
|  | GO:0001666 | response to hypoxia | 4/365 | 0.019986 | 4 |
|  | GO:0030574 | collagen catabolic process | 4/365 | 0.019986 | 4 |
|  | GO:0033209 | tumor necrosis factor-mediated signaling pathway | 4/365 | 0.019986 | 4 |
|  | GO:0036293 | response to decreased oxygen levels | 4/365 | 0.019986 | 4 |
|  | GO:0048015 | phosphatidylinositol-mediated signaling | 4/365 | 0.019986 | 4 |
|  | GO:0034612 | response to tumor necrosis factor | 6/365 | 0.02016 | 6 |
|  | GO:0006536 | glutamate metabolic process | 3/365 | 0.020517 | 3 |
|  | GO:0044255 | cellular lipid metabolic process | 23/365 | 0.02124 | 23 |
|  | GO:0007189 | adenylate cyclase-activating G protein-coupled receptor signaling pathway | 8/365 | 0.022577 | 8 |
|  | GO:0015844 | monoamine transport | 4/365 | 0.022577 | 4 |
|  | GO:0018958 | phenol-containing compound metabolic process | 4/365 | 0.022577 | 4 |
|  | GO:0001993 | regulation of systemic arterial blood pressure by norepinephrine-epinephrine | 2/365 | 0.022577 | 2 |
|  | GO:0002025 | norepinephrine-epinephrine-mediated vasodilation involved in regulation of systemic arterial blood pressure | 2/365 | 0.022577 | 2 |
|  | GO:0006527 | arginine catabolic process | 2/365 | 0.022577 | 2 |
|  | GO:0019695 | choline metabolic process | 2/365 | 0.022577 | 2 |
|  | GO:0042987 | amyloid precursor protein catabolic process | 2/365 | 0.022577 | 2 |
|  | GO:0045777 | positive regulation of blood pressure | 2/365 | 0.022577 | 2 |
|  | GO:0046100 | hypoxanthine metabolic process | 2/365 | 0.022577 | 2 |
|  | GO:0009154 | purine ribonucleotide catabolic process | 5/365 | 0.022626 | 5 |
|  | GO:0009261 | ribonucleotide catabolic process | 5/365 | 0.022626 | 5 |
|  | GO:0043066 | negative regulation of apoptotic process | 10/365 | 0.025512 | 10 |
|  | GO:0051239 | regulation of multicellular organismal process | 22/365 | 0.025818 | 22 |
|  | GO:0044242 | cellular lipid catabolic process | 8/365 | 0.025818 | 8 |
|  | GO:1901698 | response to nitrogen compound | 12/365 | 0.025931 | 12 |
|  | GO:0043069 | negative regulation of programmed cell death | 10/365 | 0.026204 | 10 |
|  | GO:0044057 | regulation of system process | 7/365 | 0.027148 | 7 |
|  | GO:0072359 | circulatory system development | 10/365 | 0.027254 | 10 |
|  | GO:0032963 | collagen metabolic process | 4/365 | 0.028767 | 4 |
|  | GO:0034097 | response to cytokine | 14/365 | 0.029827 | 14 |
|  | GO:1901652 | response to peptide | 14/365 | 0.029827 | 14 |
|  | GO:0019221 | cytokine-mediated signaling pathway | 13/365 | 0.030445 | 13 |
|  | GO:0034655 | nucleobase-containing compound catabolic process | 12/365 | 0.030445 | 12 |
|  | GO:0003044 | regulation of systemic arterial blood pressure mediated by a chemical signal | 3/365 | 0.030445 | 3 |
|  | GO:0009070 | serine family amino acid biosynthetic process | 3/365 | 0.030445 | 3 |
|  | GO:0071880 | adenylate cyclase-activating adrenergic receptor signaling pathway | 4/365 | 0.032216 | 4 |
|  | GO:0006195 | purine nucleotide catabolic process | 5/365 | 0.032611 | 5 |
|  | GO:0006457 | protein folding | 10/365 | 0.032993 | 10 |
|  | GO:0060047 | heart contraction | 5/365 | 0.035056 | 5 |
|  | GO:0009259 | ribonucleotide metabolic process | 9/365 | 0.035056 | 9 |
|  | GO:0006096 | glycolytic process | 4/365 | 0.035056 | 4 |
|  | GO:0009137 | purine nucleoside diphosphate catabolic process | 4/365 | 0.035056 | 4 |
|  | GO:0009181 | purine ribonucleoside diphosphate catabolic process | 4/365 | 0.035056 | 4 |
|  | GO:0009191 | ribonucleoside diphosphate catabolic process | 4/365 | 0.035056 | 4 |
|  | GO:0046032 | ADP catabolic process | 4/365 | 0.035056 | 4 |
|  | GO:0051092 | positive regulation of NF-kappaB transcription factor activity | 4/365 | 0.035056 | 4 |
|  | GO:0070482 | response to oxygen levels | 4/365 | 0.035056 | 4 |
|  | GO:0072521 | purine-containing compound metabolic process | 13/365 | 0.035056 | 13 |
|  | GO:0008291 | acetylcholine metabolic process | 2/365 | 0.035117 | 2 |
|  | GO:0009133 | nucleoside diphosphate biosynthetic process | 2/365 | 0.035117 | 2 |
|  | GO:0009713 | catechol-containing compound biosynthetic process | 2/365 | 0.035117 | 2 |
|  | GO:0014821 | phasic smooth muscle contraction | 2/365 | 0.035117 | 2 |
|  | GO:0042423 | catecholamine biosynthetic process | 2/365 | 0.035117 | 2 |
|  | GO:0043096 | purine nucleobase salvage | 2/365 | 0.035117 | 2 |
|  | GO:0048483 | autonomic nervous system development | 2/365 | 0.035117 | 2 |
|  | GO:0048484 | enteric nervous system development | 2/365 | 0.035117 | 2 |
|  | GO:0072577 | endothelial cell apoptotic process | 2/365 | 0.035117 | 2 |
|  | GO:1900619 | acetate ester metabolic process | 2/365 | 0.035117 | 2 |
|  | GO:2000351 | regulation of endothelial cell apoptotic process | 2/365 | 0.035117 | 2 |
|  | GO:0003015 | heart process | 5/365 | 0.035117 | 5 |
|  | GO:0170035 | L-amino acid catabolic process | 5/365 | 0.035117 | 5 |
|  | GO:0170040 | proteinogenic amino acid catabolic process | 5/365 | 0.035117 | 5 |
|  | GO:0044093 | positive regulation of molecular function | 16/365 | 0.035205 | 16 |
|  | GO:0042310 | vasoconstriction | 4/365 | 0.036729 | 4 |
|  | GO:0071875 | adrenergic receptor signaling pathway | 4/365 | 0.036729 | 4 |
|  | GO:0007507 | heart development | 6/365 | 0.041167 | 6 |
|  | GO:0006576 | biogenic amine metabolic process | 4/365 | 0.041197 | 4 |
|  | GO:0019364 | pyridine nucleotide catabolic process | 4/365 | 0.041197 | 4 |
|  | GO:0042026 | protein refolding | 4/365 | 0.041197 | 4 |
|  | GO:0002758 | innate immune response-activating signaling pathway | 5/365 | 0.041197 | 5 |
|  | GO:1901292 | nucleoside phosphate catabolic process | 6/365 | 0.043378 | 6 |
|  | GO:0031347 | regulation of defense response | 8/365 | 0.043484 | 8 |
|  | GO:0019693 | ribose phosphate metabolic process | 9/365 | 0.045587 | 9 |
|  | GO:0043603 | amide metabolic process | 11/365 | 0.045587 | 11 |
|  | GO:0072526 | pyridine-containing compound catabolic process | 4/365 | 0.045587 | 4 |
|  | GO:0098657 | import into cell | 14/365 | 0.04679 | 14 |
|  | GO:0000302 | response to reactive oxygen species | 3/365 | 0.047064 | 3 |
|  | GO:0009309 | amine biosynthetic process | 3/365 | 0.047064 | 3 |
|  | GO:0042401 | biogenic amine biosynthetic process | 3/365 | 0.047064 | 3 |
|  | GO:0046112 | nucleobase biosynthetic process | 3/365 | 0.047064 | 3 |
|  | GO:0097191 | extrinsic apoptotic signaling pathway | 5/365 | 0.047211 | 5 |
|  | GO:0000303 | response to superoxide | 2/365 | 0.048343 | 2 |
|  | GO:0000305 | response to oxygen radical | 2/365 | 0.048343 | 2 |
|  | GO:0001973 | G protein-coupled adenosine receptor signaling pathway | 2/365 | 0.048343 | 2 |
|  | GO:0019430 | removal of superoxide radicals | 2/365 | 0.048343 | 2 |
|  | GO:0035588 | G protein-coupled purinergic receptor signaling pathway | 2/365 | 0.048343 | 2 |
|  | GO:0035590 | purinergic nucleotide receptor signaling pathway | 2/365 | 0.048343 | 2 |
|  | GO:0038180 | nerve growth factor signaling pathway | 2/365 | 0.048343 | 2 |
|  | GO:0042730 | fibrinolysis | 2/365 | 0.048343 | 2 |
|  | GO:0046113 | nucleobase catabolic process | 2/365 | 0.048343 | 2 |
|  | GO:0050435 | amyloid-beta metabolic process | 2/365 | 0.048343 | 2 |
|  | GO:0071450 | cellular response to oxygen radical | 2/365 | 0.048343 | 2 |
|  | GO:0071451 | cellular response to superoxide | 2/365 | 0.048343 | 2 |
|  | GO:0097242 | amyloid-beta clearance | 2/365 | 0.048343 | 2 |
|  | GO:0016054 | organic acid catabolic process | 8/365 | 0.048343 | 8 |
|  | GO:0046395 | carboxylic acid catabolic process | 8/365 | 0.048343 | 8 |
|  | GO:0045935 | positive regulation of nucleobase-containing compound metabolic process | 17/365 | 0.048664 | 17 |
| GO (CC) | GO:0045121 | membrane raft | 7/329 | 0.000376 | 7 |
|  | GO:0098857 | membrane microdomain | 7/329 | 0.000376 | 7 |
|  | GO:0036477 | somatodendritic compartment | 14/329 | 0.000507 | 14 |
|  | GO:1902911 | protein kinase complex | 10/329 | 0.000556 | 10 |
|  | GO:1902554 | serine/threonine protein kinase complex | 9/329 | 0.001546 | 9 |
|  | GO:0005764 | lysosome | 13/329 | 0.002084 | 13 |
|  | GO:0000323 | lytic vacuole | 13/329 | 0.002084 | 13 |
|  | GO:0098590 | plasma membrane region | 18/329 | 0.002946 | 18 |
|  | GO:0043005 | neuron projection | 22/329 | 0.003339 | 22 |
|  | GO:0043025 | neuronal cell body | 7/329 | 0.006048 | 7 |
|  | GO:0044297 | cell body | 7/329 | 0.006048 | 7 |
|  | GO:0061695 | transferase complex, transferring phosphorus-containing groups | 14/329 | 0.006235 | 14 |
|  | GO:0005773 | vacuole | 14/329 | 0.006235 | 14 |
|  | GO:0035253 | ciliary rootlet | 2/329 | 0.009973 | 2 |
|  | GO:0030016 | myofibril | 7/329 | 0.016109 | 7 |
|  | GO:0043292 | contractile muscle fiber | 7/329 | 0.016157 | 7 |
|  | GO:0030425 | dendrite | 9/329 | 0.016157 | 9 |
|  | GO:0097447 | dendritic tree | 9/329 | 0.016157 | 9 |
|  | GO:0008385 | IkappaB kinase complex | 2/329 | 0.020634 | 2 |
|  | GO:0043198 | dendritic shaft | 2/329 | 0.020634 | 2 |
|  | GO:0030017 | sarcomere | 6/329 | 0.028904 | 6 |
|  | GO:0048471 | perinuclear region of cytoplasm | 5/329 | 0.029802 | 5 |
|  | GO:0045177 | apical part of cell | 6/329 | 0.039676 | 6 |
|  | GO:0043235 | receptor complex | 11/329 | 0.046739 | 11 |
| GO (MF) | GO:0004175 | endopeptidase activity | 27/365 | 0.001423 | 27 |
|  | GO:0019955 | cytokine binding | 8/365 | 0.001936 | 8 |
|  | GO:0050661 | NADP binding | 6/365 | 0.00697 | 6 |
|  | GO:0016705 | oxidoreductase activity, acting on paired donors, with incorporation or reduction of molecular oxygen | 13/365 | 0.024987 | 13 |
|  | GO:0008504 | monoamine transmembrane transporter activity | 3/365 | 0.024987 | 3 |
|  | GO:0044183 | protein folding chaperone | 6/365 | 0.024987 | 6 |
|  | GO:0016209 | antioxidant activity | 7/365 | 0.024987 | 7 |
|  | GO:0004674 | protein serine/threonine kinase activity | 17/365 | 0.024987 | 17 |
|  | GO:0003990 | acetylcholinesterase activity | 2/365 | 0.024987 | 2 |
|  | GO:0004104 | cholinesterase activity | 2/365 | 0.024987 | 2 |
|  | GO:0004666 | prostaglandin-endoperoxide synthase activity | 2/365 | 0.024987 | 2 |
|  | GO:0004962 | endothelin receptor activity | 2/365 | 0.024987 | 2 |
|  | GO:0005330 | dopamine:sodium symporter activity | 2/365 | 0.024987 | 2 |
|  | GO:0005334 | norepinephrine:sodium symporter activity | 2/365 | 0.024987 | 2 |
|  | GO:0008384 | IkappaB kinase activity | 2/365 | 0.024987 | 2 |
|  | GO:0030284 | nuclear estrogen receptor activity | 2/365 | 0.024987 | 2 |
|  | GO:0004697 | diacylglycerol-dependent serine/threonine kinase activity | 3/365 | 0.02596 | 3 |
|  | GO:0004954 | prostanoid receptor activity | 3/365 | 0.02596 | 3 |
|  | GO:0020037 | heme binding | 10/365 | 0.02596 | 10 |
|  | GO:0140662 | ATP-dependent protein folding chaperone | 5/365 | 0.026281 | 5 |
|  | GO:0004879 | nuclear receptor activity | 6/365 | 0.026281 | 6 |
|  | GO:0098531 | ligand-activated transcription factor activity | 6/365 | 0.026281 | 6 |
|  | GO:0046906 | tetrapyrrole binding | 10/365 | 0.029032 | 10 |
|  | GO:0005201 | extracellular matrix structural constituent | 5/365 | 0.030495 | 5 |
|  | GO:0004197 | cysteine-type endopeptidase activity | 7/365 | 0.030495 | 7 |
|  | GO:0052689 | carboxylic ester hydrolase activity | 10/365 | 0.035793 | 10 |
|  | GO:0004517 | nitric-oxide synthase activity | 2/365 | 0.035793 | 2 |
|  | GO:0004784 | superoxide dismutase activity | 2/365 | 0.035793 | 2 |
|  | GO:0004939 | beta-adrenergic receptor activity | 2/365 | 0.035793 | 2 |
|  | GO:0005114 | type II transforming growth factor beta receptor binding | 2/365 | 0.035793 | 2 |
|  | GO:0016721 | oxidoreductase activity, acting on superoxide radicals as acceptor | 2/365 | 0.035793 | 2 |
|  | GO:0034714 | type III transforming growth factor beta receptor binding | 2/365 | 0.035793 | 2 |
|  | GO:0045294 | alpha-catenin binding | 2/365 | 0.035793 | 2 |
|  | GO:0008083 | growth factor activity | 8/365 | 0.036365 | 8 |
|  | GO:0004497 | monooxygenase activity | 9/365 | 0.036426 | 9 |
|  | GO:0010181 | FMN binding | 3/365 | 0.036426 | 3 |
|  | GO:0004252 | serine-type endopeptidase activity | 11/365 | 0.042952 | 11 |
|  | GO:0004953 | icosanoid receptor activity | 3/365 | 0.044074 | 3 |
|  | GO:0015378 | sodium:chloride symporter activity | 3/365 | 0.044074 | 3 |
|  | GO:0050660 | flavin adenine dinucleotide binding | 7/365 | 0.0495 | 7 |
|  | GO:0015373 | monoatomic anion:sodium symporter activity | 3/365 | 0.0495 | 3 |
|  | GO:0004896 | cytokine receptor activity | 7/365 | 0.0495 | 7 |
|  | GO:0004690 | cyclic nucleotide-dependent protein kinase activity | 2/365 | 0.0495 | 2 |
|  | GO:0005163 | nerve growth factor receptor binding | 2/365 | 0.0495 | 2 |
|  | GO:0005165 | neurotrophin receptor binding | 2/365 | 0.0495 | 2 |
|  | GO:0097153 | cysteine-type endopeptidase activity involved in apoptotic process | 2/365 | 0.0495 | 2 |
|  | GO:0097718 | disordered domain specific binding | 2/365 | 0.0495 | 2 |
| KEGG | bta04933 | AGE-RAGE signaling pathway in diabetic complications | 39/340 | 3.34E-28 | 39 |
|  | bta05417 | Lipid and atherosclerosis | 52/340 | 1.13E-24 | 52 |
|  | bta05205 | Proteoglycans in cancer | 48/340 | 1.40E-24 | 48 |
|  | bta04066 | HIF-1 signaling pathway | 35/340 | 5.59E-22 | 35 |
|  | bta05418 | Fluid shear stress and atherosclerosis | 34/340 | 8.85E-17 | 34 |
|  | bta05142 | Chagas disease | 30/340 | 5.81E-16 | 30 |
|  | bta05161 | Hepatitis B | 36/340 | 8.12E-16 | 36 |
|  | bta05163 | Human cytomegalovirus infection | 40/340 | 2.12E-14 | 40 |
|  | bta05210 | Colorectal cancer | 25/340 | 2.12E-14 | 25 |
|  | bta05212 | Pancreatic cancer | 23/340 | 2.92E-14 | 23 |
|  | bta04151 | PI3K-Akt signaling pathway | 49/340 | 1.66E-13 | 49 |
|  | bta04510 | Focal adhesion | 34/340 | 7.13E-13 | 34 |
|  | bta05146 | Amoebiasis | 26/340 | 1.14E-12 | 26 |
|  | bta04926 | Relaxin signaling pathway | 27/340 | 1.78E-12 | 27 |
|  | bta05225 | Hepatocellular carcinoma | 31/340 | 1.78E-12 | 31 |
|  | bta04611 | Platelet activation | 26/340 | 2.13E-12 | 26 |
|  | bta04071 | Sphingolipid signaling pathway | 26/340 | 3.01E-12 | 26 |
|  | bta04210 | Apoptosis | 28/340 | 4.58E-12 | 28 |
|  | bta04010 | MAPK signaling pathway | 40/340 | 4.58E-12 | 40 |
|  | bta05215 | Prostate cancer | 23/340 | 5.64E-12 | 23 |
|  | bta01521 | EGFR tyrosine kinase inhibitor resistance | 20/340 | 7.34E-11 | 20 |
|  | bta04919 | Thyroid hormone signaling pathway | 24/340 | 7.37E-11 | 24 |
|  | bta05167 | Kaposi sarcoma-associated herpesvirus infection | 32/340 | 1.16E-10 | 32 |
|  | bta04370 | VEGF signaling pathway | 17/340 | 1.44E-10 | 17 |
|  | bta05166 | Human T-cell leukemia virus 1 infection | 33/340 | 1.66E-10 | 33 |
|  | bta05162 | Measles | 27/340 | 1.70E-10 | 27 |
|  | bta05220 | Chronic myeloid leukemia | 19/340 | 2.58E-10 | 19 |
|  | bta05415 | Diabetic cardiomyopathy | 32/340 | 3.99E-10 | 32 |
|  | bta04068 | FoxO signaling pathway | 24/340 | 5.35E-10 | 24 |
|  | bta05223 | Non-small cell lung cancer | 18/340 | 6.47E-10 | 18 |
|  | bta01522 | Endocrine resistance | 20/340 | 9.00E-10 | 20 |
|  | bta05145 | Toxoplasmosis | 22/340 | 1.02E-09 | 22 |
|  | bta04670 | Leukocyte transendothelial migration | 22/340 | 1.18E-09 | 22 |
|  | bta05135 | Yersinia infection | 25/340 | 1.83E-09 | 25 |
|  | bta05169 | Epstein-Barr virus infection | 31/340 | 2.07E-09 | 31 |
|  | bta04915 | Estrogen signaling pathway | 23/340 | 4.90E-09 | 23 |
|  | bta05207 | Chemical carcinogenesis - receptor activation | 29/340 | 5.69E-09 | 29 |
|  | bta05165 | Human papillomavirus infection | 38/340 | 6.66E-09 | 38 |
|  | bta05144 | Malaria | 15/340 | 8.02E-09 | 15 |
|  | bta04923 | Regulation of lipolysis in adipocytes | 15/340 | 1.02E-08 | 15 |
|  | bta04726 | Serotonergic synapse | 21/340 | 1.18E-08 | 21 |
|  | bta05143 | African trypanosomiasis | 13/340 | 1.20E-08 | 13 |
|  | bta05140 | Leishmaniasis | 17/340 | 1.21E-08 | 17 |
|  | bta05230 | Central carbon metabolism in cancer | 16/340 | 1.41E-08 | 16 |
|  | bta04659 | Th17 cell differentiation | 20/340 | 1.85E-08 | 20 |
|  | bta05170 | Human immunodeficiency virus 1 infection | 30/340 | 1.85E-08 | 30 |
|  | bta04960 | Aldosterone-regulated sodium reabsorption | 12/340 | 1.85E-08 | 12 |
|  | bta04152 | AMPK signaling pathway | 21/340 | 1.85E-08 | 21 |
|  | bta04520 | Adherens junction | 18/340 | 2.14E-08 | 18 |
|  | bta05226 | Gastric cancer | 23/340 | 2.79E-08 | 23 |
|  | bta05132 | Salmonella infection | 31/340 | 2.81E-08 | 31 |
|  | bta05235 | PD-L1 expression and PD-1 checkpoint pathway in cancer | 18/340 | 2.89E-08 | 18 |
|  | bta05160 | Hepatitis C | 25/340 | 3.24E-08 | 25 |
|  | bta04921 | Oxytocin signaling pathway | 23/340 | 3.34E-08 | 23 |
|  | bta05164 | Influenza A | 26/340 | 4.03E-08 | 26 |
|  | bta04022 | cGMP-PKG signaling pathway | 24/340 | 4.57E-08 | 24 |
|  | bta04668 | TNF signaling pathway | 21/340 | 4.88E-08 | 21 |
|  | bta05222 | Small cell lung cancer | 18/340 | 5.15E-08 | 18 |
|  | bta04015 | Rap1 signaling pathway | 27/340 | 5.63E-08 | 27 |
|  | bta05221 | Acute myeloid leukemia | 15/340 | 6.96E-08 | 15 |
|  | bta05206 | MicroRNAs in cancer | 32/340 | 8.33E-08 | 32 |
|  | bta04024 | cAMP signaling pathway | 29/340 | 9.10E-08 | 29 |
|  | bta04213 | Longevity regulating pathway - multiple species | 14/340 | 9.72E-08 | 14 |
|  | bta05171 | Coronavirus disease - COVID-19 | 33/340 | 1.19E-07 | 33 |
|  | bta04371 | Apelin signaling pathway | 21/340 | 1.40E-07 | 21 |
|  | bta04730 | Long-term depression | 14/340 | 1.44E-07 | 14 |
|  | bta05211 | Renal cell carcinoma | 15/340 | 1.71E-07 | 15 |
|  | bta04917 | Prolactin signaling pathway | 16/340 | 1.77E-07 | 16 |
|  | bta04935 | Growth hormone synthesis, secretion and action | 19/340 | 1.77E-07 | 19 |
|  | bta04217 | Necroptosis | 24/340 | 2.14E-07 | 24 |
|  | bta04014 | Ras signaling pathway | 28/340 | 2.14E-07 | 28 |
|  | bta04931 | Insulin resistance | 18/340 | 2.30E-07 | 18 |
|  | bta05231 | Choline metabolism in cancer | 17/340 | 3.01E-07 | 17 |
|  | bta05224 | Breast cancer | 21/340 | 3.13E-07 | 21 |
|  | bta04722 | Neurotrophin signaling pathway | 19/340 | 3.13E-07 | 19 |
|  | bta05133 | Pertussis | 15/340 | 3.13E-07 | 15 |
|  | bta05214 | Glioma | 15/340 | 3.13E-07 | 15 |
|  | bta04211 | Longevity regulating pathway | 16/340 | 3.60E-07 | 16 |
|  | bta04064 | NF-kappa B signaling pathway | 18/340 | 3.71E-07 | 18 |
|  | bta04928 | Parathyroid hormone synthesis, secretion and action | 18/340 | 4.20E-07 | 18 |
|  | bta04540 | Gap junction | 16/340 | 4.77E-07 | 16 |
|  | bta04020 | Calcium signaling pathway | 28/340 | 7.67E-07 | 28 |
|  | bta04062 | Chemokine signaling pathway | 23/340 | 1.02E-06 | 23 |
|  | bta04666 | Fc gamma R-mediated phagocytosis | 16/340 | 1.14E-06 | 16 |
|  | bta04932 | Non-alcoholic fatty liver disease | 22/340 | 1.15E-06 | 22 |
|  | bta04918 | Thyroid hormone synthesis | 14/340 | 1.33E-06 | 14 |
|  | bta04971 | Gastric acid secretion | 14/340 | 1.33E-06 | 14 |
|  | bta05152 | Tuberculosis | 24/340 | 1.39E-06 | 24 |
|  | bta04380 | Osteoclast differentiation | 20/340 | 1.39E-06 | 20 |
|  | bta04725 | Cholinergic synapse | 17/340 | 1.97E-06 | 17 |
|  | bta05031 | Amphetamine addiction | 13/340 | 2.53E-06 | 13 |
|  | bta04936 | Alcoholic liver disease | 20/340 | 2.53E-06 | 20 |
|  | bta04610 | Complement and coagulation cascades | 15/340 | 2.85E-06 | 15 |
|  | bta04657 | IL-17 signaling pathway | 15/340 | 3.74E-06 | 15 |
|  | bta04218 | Cellular senescence | 20/340 | 4.46E-06 | 20 |
|  | bta04728 | Dopaminergic synapse | 18/340 | 4.56E-06 | 18 |
|  | bta04924 | Renin secretion | 13/340 | 4.69E-06 | 13 |
|  | bta04620 | Toll-like receptor signaling pathway | 17/340 | 4.77E-06 | 17 |
|  | bta05168 | Herpes simplex virus 1 infection | 23/340 | 5.05E-06 | 23 |
|  | bta05218 | Melanoma | 13/340 | 5.34E-06 | 13 |
|  | bta04012 | ErbB signaling pathway | 14/340 | 5.47E-06 | 14 |
|  | bta04081 | Hormone signaling | 24/340 | 5.87E-06 | 24 |
|  | bta04929 | GnRH secretion | 12/340 | 7.58E-06 | 12 |
|  | bta04660 | T cell receptor signaling pathway | 17/340 | 7.86E-06 | 17 |
|  | bta04270 | Vascular smooth muscle contraction | 18/340 | 7.86E-06 | 18 |
|  | bta05020 | Prion disease | 28/340 | 9.06E-06 | 28 |
|  | bta05321 | Inflammatory bowel disease | 12/340 | 1.40E-05 | 12 |
|  | bta05134 | Legionellosis | 11/340 | 1.45E-05 | 11 |
|  | bta04914 | Progesterone-mediated oocyte maturation | 14/340 | 1.50E-05 | 14 |
|  | bta05030 | Cocaine addiction | 10/340 | 1.59E-05 | 10 |
|  | bta04150 | mTOR signaling pathway | 19/340 | 1.66E-05 | 19 |
|  | bta05010 | Alzheimer disease | 34/340 | 1.81E-05 | 34 |
|  | bta04664 | Fc epsilon RI signaling pathway | 12/340 | 1.81E-05 | 12 |
|  | bta04350 | TGF-beta signaling pathway | 15/340 | 1.81E-05 | 15 |
|  | bta04925 | Aldosterone synthesis and secretion | 14/340 | 1.84E-05 | 14 |
|  | bta05213 | Endometrial cancer | 11/340 | 1.89E-05 | 11 |
|  | bta04621 | NOD-like receptor signaling pathway | 21/340 | 1.89E-05 | 21 |
|  | bta04750 | Inflammatory mediator regulation of TRP channels | 15/340 | 1.96E-05 | 15 |
|  | bta04911 | Insulin secretion | 13/340 | 2.23E-05 | 13 |
|  | bta04810 | Regulation of actin cytoskeleton | 23/340 | 2.25E-05 | 23 |
|  | bta04910 | Insulin signaling pathway | 17/340 | 2.57E-05 | 17 |
|  | bta04140 | Autophagy - animal | 19/340 | 3.02E-05 | 19 |
|  | bta04913 | Ovarian steroidogenesis | 11/340 | 3.41E-05 | 11 |
|  | bta05100 | Bacterial invasion of epithelial cells | 12/340 | 3.41E-05 | 12 |
|  | bta04916 | Melanogenesis | 14/340 | 3.85E-05 | 14 |
|  | bta04972 | Pancreatic secretion | 14/340 | 3.85E-05 | 14 |
|  | bta05219 | Bladder cancer | 9/340 | 3.94E-05 | 9 |
|  | bta04613 | Neutrophil extracellular trap formation | 23/340 | 3.94E-05 | 23 |
|  | bta05323 | Rheumatoid arthritis | 14/340 | 4.21E-05 | 14 |
|  | bta04625 | C-type lectin receptor signaling pathway | 14/340 | 5.21E-05 | 14 |
|  | bta04912 | GnRH signaling pathway | 13/340 | 5.50E-05 | 13 |
|  | bta04662 | B cell receptor signaling pathway | 13/340 | 6.14E-05 | 13 |
|  | bta01524 | Platinum drug resistance | 12/340 | 7.02E-05 | 12 |
|  | bta05414 | Dilated cardiomyopathy | 14/340 | 7.72E-05 | 14 |
|  | bta04261 | Adrenergic signaling in cardiomyocytes | 17/340 | 0.000103 | 17 |
|  | bta05203 | Viral carcinogenesis | 22/340 | 0.000113 | 22 |
|  | bta04713 | Circadian entrainment | 13/340 | 0.000128 | 13 |
|  | bta05208 | Chemical carcinogenesis - reactive oxygen species | 23/340 | 0.000137 | 23 |
|  | bta04115 | p53 signaling pathway | 12/340 | 0.000138 | 12 |
|  | bta04970 | Salivary secretion | 13/340 | 0.000139 | 13 |
|  | bta04961 | Endocrine and other factor-regulated calcium reabsorption | 9/340 | 0.000149 | 9 |
|  | bta00220 | Arginine biosynthesis | 6/340 | 0.000149 | 6 |
|  | bta05410 | Hypertrophic cardiomyopathy | 13/340 | 0.000151 | 13 |
|  | bta04110 | Cell cycle | 17/340 | 0.000155 | 17 |
|  | bta05216 | Thyroid cancer | 8/340 | 0.000211 | 8 |
|  | bta04148 | Efferocytosis | 17/340 | 0.000223 | 17 |
|  | bta04072 | Phospholipase D signaling pathway | 16/340 | 0.000241 | 16 |
|  | bta04658 | Th1 and Th2 cell differentiation | 12/340 | 0.000337 | 12 |
|  | bta04973 | Carbohydrate digestion and absorption | 8/340 | 0.000341 | 8 |
|  | bta05012 | Parkinson disease | 24/340 | 0.00041 | 24 |
|  | bta01212 | Fatty acid metabolism | 9/340 | 0.000448 | 9 |
|  | bta04930 | Type II diabetes mellitus | 8/340 | 0.000459 | 8 |
|  | bta01230 | Biosynthesis of amino acids | 10/340 | 0.000554 | 10 |
|  | bta04922 | Glucagon signaling pathway | 12/340 | 0.000574 | 12 |
|  | bta04650 | Natural killer cell mediated cytotoxicity | 15/340 | 0.001142 | 15 |
|  | bta01523 | Antifolate resistance | 8/340 | 0.001192 | 8 |
|  | bta04310 | Wnt signaling pathway | 16/340 | 0.001262 | 16 |
|  | bta05416 | Viral myocarditis | 10/340 | 0.001371 | 10 |
|  | bta05202 | Transcriptional misregulation in cancer | 17/340 | 0.001428 | 17 |
|  | bta03320 | PPAR signaling pathway | 10/340 | 0.001489 | 10 |
|  | bta04724 | Glutamatergic synapse | 12/340 | 0.001513 | 12 |
|  | bta00052 | Galactose metabolism | 6/340 | 0.001572 | 6 |
|  | bta04612 | Antigen processing and presentation | 10/340 | 0.001606 | 10 |
|  | bta01200 | Carbon metabolism | 12/340 | 0.001606 | 12 |
|  | bta04920 | Adipocytokine signaling pathway | 9/340 | 0.002047 | 9 |
|  | bta04976 | Bile secretion | 11/340 | 0.003174 | 11 |
|  | bta04630 | JAK-STAT signaling pathway | 17/340 | 0.003707 | 17 |
|  | bta04360 | Axon guidance | 15/340 | 0.003713 | 15 |
|  | bta00010 | Glycolysis / Gluconeogenesis | 8/340 | 0.003794 | 8 |
|  | bta00330 | Arginine and proline metabolism | 7/340 | 0.003794 | 7 |
|  | bta00350 | Tyrosine metabolism | 6/340 | 0.003794 | 6 |
|  | bta04927 | Cortisol synthesis and secretion | 8/340 | 0.004127 | 8 |
|  | bta04720 | Long-term potentiation | 8/340 | 0.005968 | 8 |
|  | bta04820 | Cytoskeleton in muscle cells | 17/340 | 0.006811 | 17 |
|  | bta04390 | Hippo signaling pathway | 13/340 | 0.00743 | 13 |
|  | bta04512 | ECM-receptor interaction | 9/340 | 0.007662 | 9 |
|  | bta04142 | Lysosome | 12/340 | 0.007832 | 12 |
|  | bta04530 | Tight junction | 14/340 | 0.00869 | 14 |
|  | bta04727 | GABAergic synapse | 9/340 | 0.008735 | 9 |
|  | bta05032 | Morphine addiction | 9/340 | 0.009336 | 9 |
|  | bta04550 | Signaling pathways regulating pluripotency of stem cells | 12/340 | 0.009539 | 12 |
|  | bta00380 | Tryptophan metabolism | 6/340 | 0.009539 | 6 |
|  | bta04216 | Ferroptosis | 6/340 | 0.012962 | 6 |
|  | bta04070 | Phosphatidylinositol signaling system | 9/340 | 0.013757 | 9 |
|  | bta00480 | Glutathione metabolism | 7/340 | 0.013775 | 7 |
|  | bta04723 | Retrograde endocannabinoid signaling | 12/340 | 0.01489 | 12 |
|  | bta00250 | Alanine, aspartate and glutamate metabolism | 5/340 | 0.01602 | 5 |
|  | bta04215 | Apoptosis - multiple species | 5/340 | 0.01602 | 5 |
|  | bta04146 | Peroxisome | 8/340 | 0.016469 | 8 |
|  | bta04934 | Cushing syndrome | 12/340 | 0.017696 | 12 |
|  | bta00270 | Cysteine and methionine metabolism | 6/340 | 0.019694 | 6 |
|  | bta04940 | Type I diabetes mellitus | 6/340 | 0.019694 | 6 |
|  | bta05340 | Primary immunodeficiency | 5/340 | 0.023918 | 5 |
|  | bta04114 | Oocyte meiosis | 10/340 | 0.025729 | 10 |
|  | bta05017 | Spinocerebellar ataxia | 11/340 | 0.030492 | 11 |
|  | bta04061 | Viral protein interaction with cytokine and cytokine receptor | 8/340 | 0.031744 | 8 |
|  | bta04080 | Neuroactive ligand-receptor interaction | 22/340 | 0.038416 | 22 |
|  | bta00061 | Fatty acid biosynthesis | 3/340 | 0.039338 | 3 |
|  | bta00910 | Nitrogen metabolism | 3/340 | 0.039338 | 3 |
|  | bta00630 | Glyoxylate and dicarboxylate metabolism | 4/340 | 0.045571 | 4 |
|  | bta04979 | Cholesterol metabolism | 5/340 | 0.046512 | 5 |

BP, Biological Process; CC, Cellular Component; MF, Molecular Function.
