# Supplementary material for: Exploring the toxicological mechanisms of reduced fertility in dairy cows due to nonesterified fatty acids on the basis of network toxicology, transcriptomics and molecular docking
Source: Research Square preprint supplement (doi:10.21203/rs.3.rs-7524568/v1), 2025-10-08
Supplement: Supplementary file 4 [file 6951881e6fc6cb62e13263e3.docx]

Table S3 The information of the 403 potential target genes of NEFA and CRF.

| 403 potential target genes | UniProt ID | Protein names | Length |
| --- | --- | --- | --- |
| PPARG | O18971 | Peroxisome proliferator-activated receptor gamma (PPAR-gamma) (Nuclear receptor subfamily 1 group C member 3) | 505 |
| TERT | Q27ID4 | Telomerase reverse transcriptase (EC 2.7.7.49) (Telomerase catalytic subunit) | 1125 |
| FABP3 | P10790 | Fatty acid-binding protein, heart (Fatty acid-binding protein 3) (Heart-type fatty acid-binding protein) (H-FABP) (Mammary-derived growth inhibitor) (MDGI) | 133 |
| SCD | Q9TT94 | Stearoyl-CoA desaturase (EC 1.14.19.1) (Acyl-CoA desaturase) (Delta(9)-desaturase) (Delta-9 desaturase) (Fatty acid desaturase) | 359 |
| PTGS1 | O62664 | Prostaglandin G/H synthase 1 (EC 1.14.99.1) (Cyclooxygenase-1) (COX-1) (Prostaglandin H2 synthase 1) (PGH synthase 1) (PGHS-1) (PHS 1) (Prostaglandin-endoperoxide synthase 1) | 600 |
| CDC25A | A7MBD1 | M-phase inducer phosphatase 1 (EC 3.1.3.48) (Dual specificity phosphatase Cdc25A) | 525 |
| HMGCR | A7Z064 | 3-hydroxy-3-methylglutaryl-coenzyme A reductase (HMG-CoA reductase) (EC 1.1.1.34) | 888 |
| CYP19A1 | P46194 | Aromatase (EC 1.14.14.14) (CYPXIX) (Cytochrome P-450AROM) (Cytochrome P450 19A1) (Estrogen synthase) | 503 |
| PTGS2 | O62698 | Prostaglandin G/H synthase 2 (EC 1.14.99.1) (Cyclooxygenase-2) (COX-2) (PHS II) (Prostaglandin H2 synthase 2) (PGH synthase 2) (PGHS-2) (Prostaglandin-endoperoxide synthase 2) | 604 |
| PTPRF | A7MBJ4 | Receptor-type tyrosine-protein phosphatase F (EC 3.1.3.48) | 1898 |
| ESR2 | Q9XSB5 | Estrogen receptor beta (ER-beta) (Nuclear receptor subfamily 3 group A member 2) | 527 |
| CYP17A1 | P05185 | Steroid 17-alpha-hydroxylase/17,20 lyase (EC 1.14.14.19) (17-alpha-hydroxyprogesterone aldolase) (EC 1.14.14.32) (CYPXVII) (Cytochrome P450 17A1) (Cytochrome P450-C17) (Cytochrome P450c17) (Steroid 17-alpha-monooxygenase) | 509 |
| SLC6A3 | P27922 | Sodium-dependent dopamine transporter (DA transporter) (DAT) (Solute carrier family 6 member 3) | 693 |
| BCHE | P32749 | Cholinesterase (EC 3.1.1.8) (Acylcholine acylhydrolase) (Butyrylcholine esterase) (Choline esterase II) (Pseudocholinesterase) | 602 |
| ADORA3 | Q0VC81 | Adenosine receptor A3 | 317 |
| ESR1 | P49884 | Estrogen receptor (ER) (ER-alpha) (Estradiol receptor) (Nuclear receptor subfamily 3 group A member 1) | 596 |
| CHRM2 | P41985 | Muscarinic acetylcholine receptor M2 | 465 |
| ACHE | P23795 | Acetylcholinesterase (AChE) (EC 3.1.1.7) | 613 |
| SLC6A2 | P51143 | Sodium-dependent noradrenaline transporter (Norepinephrine transporter) (NET) (Solute carrier family 6 member 2) | 615 |
| SLC6A4 | Q9XT49 | Sodium-dependent serotonin transporter (SERT) (5HT transporter) (5HTT) (Solute carrier family 6 member 4) | 630 |
| NR1H4 | Q3SZL0 | Bile acid receptor (Farnesoid X-activated receptor) (Farnesol receptor HRR-1) (Nuclear receptor subfamily 1 group H member 4) | 482 |
| PSEN2 | Q9XT96 | Presenilin-2 (PS-2) (EC 3.4.23.-) [Cleaved into: Presenilin-2 NTF subunit; Presenilin-2 CTF subunit] | 449 |
| NOS2 | Q27995 | Nitric oxide synthase, inducible (EC 1.14.13.39) (Inducible NO synthase) (Inducible NOS) (iNOS) (NOS type II) (NOSII) (Peptidyl-cysteine S-nitrosylase NOS2) | 1156 |
| PSEN1 | Q9XT97 | Presenilin-1 (PS-1) (EC 3.4.23.-) [Cleaved into: Presenilin-1 NTF subunit; Presenilin-1 CTF subunit; Presenilin-1 CTF12 (PS1-CTF12)] | 478 |
| SLC16A1 | Q3MHW6 | Monocarboxylate transporter 1 (MCT 1) (Solute carrier family 16 member 1) | 501 |
| VDR | Q28037 | Vitamin D3 receptor (VDR) (1,25-dihydroxyvitamin D3 receptor) (Nuclear receptor subfamily 1 group I member 1) | 426 |
| PLG | P06868 | Plasminogen (EC 3.4.21.7) [Cleaved into: Plasmin heavy chain A; Activation peptide; Plasmin heavy chain A, short form; Plasmin light chain B] | 812 |
| GLRA1 | P57695 | Glycine receptor subunit alpha-1 (Glycine receptor 48 kDa subunit) (Glycine receptor strychnine-binding subunit) | 457 |
| PTGFR | P37289 | Prostaglandin F2-alpha receptor (PGF receptor) (PGF2-alpha receptor) (Prostanoid FP receptor) | 362 |
| CA2 | P00921 | Carbonic anhydrase 2 (EC 4.2.1.1) (Carbonate dehydratase II) (Carbonic anhydrase II) (CA-II) (Cyanamide hydratase CA2) (EC 4.2.1.69) | 260 |
| GABRB2 | P0C2W5 | Gamma-aminobutyric acid receptor subunit beta-2 (GABA(A) receptor subunit beta-2) (GABAAR subunit beta-2) | 472 |
| GABRG2 | P22300 | Gamma-aminobutyric acid receptor subunit gamma-2 (GABA(A) receptor subunit gamma-2) (GABAAR subunit gamma-2) | 475 |
| IGF1R | Q05688 | Insulin-like growth factor 1 receptor (EC 2.7.10.1) (Insulin-like growth factor I receptor) (IGF-I receptor) (CD antigen CD221) [Cleaved into: Insulin-like growth factor 1 receptor alpha chain; Insulin-like growth factor 1 receptor beta chain] | 640 |
| RAF1 | A7E3S4 | RAF proto-oncogene serine/threonine-protein kinase (EC 2.7.11.1) (Proto-oncogene c-RAF) (cRaf) (Raf-1) | 648 |
| STAT3 | P61635 | Signal transducer and activator of transcription 3 | 770 |
| IKBKB | Q95KV0 | Inhibitor of nuclear factor kappa-B kinase subunit beta (I-kappa-B-kinase beta) (IKK-B) (IKK-beta) (IkBKB) (EC 2.7.11.10) (I-kappa-B kinase 2) (IKK2) (Nuclear factor NF-kappa-B inhibitor kinase beta) (NFKBIKB) (Serine/threonine protein kinase IKBKB) (EC 2.7.11.1) | 756 |
| TP53 | P67939 | Cellular tumor antigen p53 (Tumor suppressor p53) | 386 |
| AKT1 | Q01314 | RAC-alpha serine/threonine-protein kinase (EC 2.7.11.1) (Protein kinase B) (PKB) (Protein kinase B alpha) (PKB alpha) (RAC-PK-alpha) | 480 |
| CFTR | P35071 | Cystic fibrosis transmembrane conductance regulator (CFTR) (ATP-binding cassette sub-family C member 7) (Channel conductance-controlling ATPase) (EC 5.6.1.6) (cAMP-dependent chloride channel) | 1481 |
| MMP2 | Q9GLE5 | 72 kDa type IV collagenase (EC 3.4.24.24) (72 kDa gelatinase) (Matrix metalloproteinase-2) (MMP-2) [Cleaved into: PEX] | 661 |
| SLC2A1 | P27674 | Solute carrier family 2, facilitated glucose transporter member 1 (Glucose transporter type 1, erythrocyte/brain) (GLUT-1) | 492 |
| MMP9 | P52176 | Matrix metalloproteinase-9 (MMP-9) (EC 3.4.24.35) (92 kDa gelatinase) (92 kDa type IV collagenase) (Gelatinase B) (GELB) | 712 |
| SOD1 | P00442 | Superoxide dismutase [Cu-Zn] (EC 1.15.1.1) | 152 |
| KIT | P43481 | Mast/stem cell growth factor receptor Kit (SCFR) (EC 2.7.10.1) (Proto-oncogene c-Kit) (Tyrosine-protein kinase Kit) (CD antigen CD117) | 977 |
| DNMT1 | Q24K09 | DNA (cytosine-5)-methyltransferase 1 (Dnmt1) (EC 2.1.1.37) | 1611 |
| TNF | Q06599 | Tumor necrosis factor (Cachectin) (TNF-alpha) (Tumor necrosis factor ligand superfamily member 2) (TNF-a) [Cleaved into: Tumor necrosis factor, membrane form (N-terminal fragment) (NTF); Intracellular domain 1 (ICD1); Intracellular domain 2 (ICD2); C-domain 1; C-domain 2; Tumor necrosis factor, soluble form] | 234 |
| PIK3CA | P32871 | Phosphatidylinositol 4,5-bisphosphate 3-kinase catalytic subunit alpha isoform (PI3-kinase subunit alpha) (PI3K-alpha) (PI3Kalpha) (PtdIns-3-kinase subunit alpha) (EC 2.7.1.137) (EC 2.7.1.153) (Phosphatidylinositol 4,5-bisphosphate 3-kinase 110 kDa catalytic subunit alpha) (PtdIns-3-kinase subunit p110-alpha) (p110alpha) (Phosphoinositide-3-kinase catalytic alpha polypeptide) (Serine/threonine protein kinase PIK3CA) (EC 2.7.11.1) | 1068 |
| TGFB1 | P18341 | Transforming growth factor beta-1 proprotein [Cleaved into: Latency-associated peptide (LAP); Transforming growth factor beta-1 (TGF-beta-1)] | 390 |
| MAPK1 | P46196 | Mitogen-activated protein kinase 1 (MAP kinase 1) (MAPK 1) (EC 2.7.11.24) (ERT1) (Extracellular signal-regulated kinase 2) (ERK-2) (Mitogen-activated protein kinase 2) (MAP kinase 2) (MAPK 2) | 360 |
| HMOX1 | Q5E9F2 | Heme oxygenase 1 (HO-1) (EC 1.14.14.18) [Cleaved into: Heme oxygenase 1 soluble form] | 289 |
| MYC | Q2HJ27 | Myc proto-oncogene protein (Proto-oncogene c-Myc) (Transcription factor p64) | 439 |
| TLR2 | Q95LA9 | Toll-like receptor 2 (CD antigen CD282) | 784 |
| SMAD4 | Q1HE26 | Mothers against decapentaplegic homolog 4 (MAD homolog 4) (Mothers against DPP homolog 4) (SMAD family member 4) (SMAD 4) (Smad4) | 553 |
| IDH1 | Q9XSG3 | Isocitrate dehydrogenase [NADP] cytoplasmic (IDH) (IDH1) (EC 1.1.1.42) (Cytosolic NADP-isocitrate dehydrogenase) (IDPc) (NADP(+)-specific ICDH) (Oxalosuccinate decarboxylase) | 414 |
| SNCA | Q3T0G8 | Alpha-synuclein | 140 |
| MYLK | Q28824 | Myosin light chain kinase, smooth muscle (MLCK) (smMLCK) (EC 2.7.11.18) (Telokin) [Cleaved into: Myosin light chain kinase, smooth muscle, deglutamylated form] | 1176 |
| LDLR | P01131 | Low-density lipoprotein receptor (LDL receptor) | 845 |
| IL6 | P26892 | Interleukin-6 (IL-6) | 208 |
| CAT | P00432 | Catalase (EC 1.11.1.6) | 527 |
| CASR | P35384 | Extracellular calcium-sensing receptor (CaSR) (Parathyroid cell calcium-sensing receptor) (BoPCaR1) (PCaR1) | 1085 |
| GLUD1 | P00366 | Glutamate dehydrogenase 1, mitochondrial (GDH 1) (EC 1.4.1.3) | 558 |
| TF | Q29443 | Serotransferrin (Transferrin) (Beta-1 metal-binding globulin) (Siderophilin) | 704 |
| NFE2L2 | Q5NUA6 | Nuclear factor erythroid 2-related factor 2 (NF-E2-related factor 2) (NFE2-related factor 2) (Nuclear factor, erythroid derived 2, like 2) | 607 |
| BCL2 | O02718 | Apoptosis regulator Bcl-2 | 229 |
| FAS | P51867 | Tumor necrosis factor receptor superfamily member 6 (Apo-1 antigen) (Apoptosis-mediating surface antigen FAS) (FASLG receptor) (CD antigen CD95) | 323 |
| PRKCA | P04409 | Protein kinase C alpha type (PKC-A) (PKC-alpha) (EC 2.7.11.13) | 672 |
| GJA1 | P18246 | Gap junction alpha-1 protein (Connexin-43) (Cx43) (Vascular smooth muscle connexin-43) | 383 |
| BAX | O02703 | Apoptosis regulator BAX | 192 |
| TLR4 | Q9GL65 | Toll-like receptor 4 (CD antigen CD284) | 841 |
| FOS | O77628 | Protein c-Fos (Cellular oncogene fos) (Transcription factor AP-1 subunit c-Fos) | 380 |
| PARP1 | P18493 | Poly [ADP-ribose] polymerase 1 (PARP-1) (EC 2.4.2.30) (ADP-ribosyltransferase diphtheria toxin-like 1) (ARTD1) (DNA ADP-ribosyltransferase PARP1) (EC 2.4.2.-) (NAD(+) ADP-ribosyltransferase 1) (ADPRT 1) (Poly[ADP-ribose] synthase 1) (Protein poly-ADP-ribosyltransferase PARP1) (EC 2.4.2.-) [Cleaved into: Poly [ADP-ribose] polymerase 1, processed C-terminus (Poly [ADP-ribose] polymerase 1, 89-kDa form); Poly [ADP-ribose] polymerase 1, processed N-terminus (Poly [ADP-ribose] polymerase 1, 24-kDa form)] | 1016 |
| HSP90AA1 | Q76LV2 | Heat shock protein HSP 90-alpha (EC 3.6.4.10) | 733 |
| VIM | P48616 | Vimentin | 466 |
| CTSB | P07688 | Cathepsin B (EC 3.4.22.1) (BCSB) [Cleaved into: Cathepsin B light chain; Cathepsin B heavy chain] | 335 |
| GAPDH | P10096 | Glyceraldehyde-3-phosphate dehydrogenase (GAPDH) (EC 1.2.1.12) (Peptidyl-cysteine S-nitrosylase GAPDH) (EC 2.6.99.-) | 333 |
| PLAU | Q05589 | Urokinase-type plasminogen activator (U-plasminogen activator) (uPA) (EC 3.4.21.73) [Cleaved into: Urokinase-type plasminogen activator long chain A; Urokinase-type plasminogen activator short chain A; Urokinase-type plasminogen activator chain B] | 433 |
| NGF | P13600 | Beta-nerve growth factor (Beta-NGF) | 241 |
| CDK2 | Q5E9Y0 | Cyclin-dependent kinase 2 (EC 2.7.11.22) (Cell division protein kinase 2) | 298 |
| LDHA | P19858 | L-lactate dehydrogenase A chain (LDH-A) (EC 1.1.1.27) (LDH muscle subunit) (LDH-M) | 332 |
| PLK1 | Q2TA25 | Serine/threonine-protein kinase PLK1 (EC 2.7.11.21) (Polo-like kinase 1) (PLK-1) | 602 |
| PRKCG | P05128 | Protein kinase C gamma type (PKC-gamma) (EC 2.7.11.13) | 682 |
| FOXO1 | E1BPQ1 | Forkhead box protein O1 (Forkhead box protein O1A) (Forkhead in rhabdomyosarcoma) | 624 |
| DDC | P27718 | Aromatic-L-amino-acid decarboxylase (AADC) (EC 4.1.1.28) (DOPA decarboxylase) (DDC) | 487 |
| LPL | P11151 | Lipoprotein lipase (LPL) (EC 3.1.1.34) (Phospholipase A1) (EC 3.1.1.32) | 478 |
| CD36 | P26201 | Platelet glycoprotein 4 (Glycoprotein IIIb) (GPIIIB) (PAS IV) (PAS-4) (Platelet glycoprotein IV) (GPIV) (CD antigen CD36) | 472 |
| APOA1 | P15497 | Apolipoprotein A-I (Apo-AI) (ApoA-I) (Apolipoprotein A1) [Cleaved into: Proapolipoprotein A-I (ProapoA-I); Truncated apolipoprotein A-I] | 265 |
| APP | Q28053 | Amyloid-beta precursor protein (ABPP) (APP) (Alzheimer disease amyloid A4 protein homolog) (Amyloid precursor protein) (Amyloid-beta (A4) precursor protein) (Amyloid-beta A4 protein) [Cleaved into: Soluble APP-beta (S-APP-beta); CTF-alpha; Amyloid-beta protein 42 (Abeta42) (Beta-APP42); Amyloid-beta protein 40 (Abeta40) (Beta-APP40); Gamma-secretase C-terminal fragment 59 (Gamma-CTF(59)); Gamma-secretase C-terminal fragment 57 (Gamma-CTF(57))] | 59 |
| BRCA1 | Q864U1 | Breast cancer type 1 susceptibility protein homolog (EC 2.3.2.27) (RING-type E3 ubiquitin transferase BRCA1) | 1849 |
| F2 | P00735 | Prothrombin (EC 3.4.21.5) (Coagulation factor II) [Cleaved into: Activation peptide fragment 1; Activation peptide fragment 2; Thrombin light chain; Thrombin heavy chain] | 625 |
| ICAM1 | Q95132 | Intercellular adhesion molecule 1 (ICAM-1) (CD antigen CD54) | 535 |
| EIF2AK3 | A5D791 | Eukaryotic translation initiation factor 2-alpha kinase 3 (EC 2.7.11.1) (PRKR-like endoplasmic reticulum kinase) (Protein tyrosine kinase EIF2AK3) (EC 2.7.10.2) | 1115 |
| SERPINE1 | P13909 | Plasminogen activator inhibitor 1 (PAI) (PAI-1) (Endothelial plasminogen activator inhibitor) (Serpin E1) | 402 |
| ACTB | P60712 | Actin, cytoplasmic 1 (EC 3.6.4.-) (Beta-actin) [Cleaved into: Actin, cytoplasmic 1, N-terminally processed] | 375 |
| FN1 | P07589 | Fibronectin (FN) [Cleaved into: Anastellin] | 2478 |
| IL2RA | P12342 | Interleukin-2 receptor subunit alpha (IL-2 receptor subunit alpha) (IL-2-RA) (IL-2R subunit alpha) (IL2-RA) (TAC antigen) (p55) (CD antigen CD25) | 275 |
| RPS6KB1 | Q6TJY3 | Ribosomal protein S6 kinase beta-1 (S6K-beta-1) (S6K1) (EC 2.7.11.1) (70 kDa ribosomal protein S6 kinase 1) (P70S6K1) (p70-S6K 1) | 527 |
| PCNA | Q3ZBW4 | Proliferating cell nuclear antigen (PCNA) | 261 |
| SLC2A2 | P58351 | Solute carrier family 2, facilitated glucose transporter member 2 (Glucose transporter type 2, liver) (GLUT-2) | 510 |
| PLA2G7 | Q28017 | Platelet-activating factor acetylhydrolase (PAF acetylhydrolase) (EC 3.1.1.47) (1-alkyl-2-acetylglycerophosphocholine esterase) (2-acetyl-1-alkylglycerophosphocholine esterase) (LDL-associated phospholipase A2) (LDL-PLA(2)) (PAF 2-acylhydrolase) | 444 |
| CHUK | Q95KV1 | Inhibitor of nuclear factor kappa-B kinase subunit alpha (I-kappa-B kinase alpha) (IKK-A) (IKK-alpha) (IkBKA) (EC 2.7.11.10) (I-kappa-B kinase 1) (IKK1) (Nuclear factor NF-kappa-B inhibitor kinase alpha) (NFKBIKA) | 740 |
| CDC42 | Q2KJ93 | Cell division control protein 42 homolog (EC 3.6.5.2) | 191 |
| PPP2CA | P67774 | Serine/threonine-protein phosphatase 2A catalytic subunit alpha isoform (PP2A-alpha) (EC 3.1.3.16) | 309 |
| RAC2 | Q9TU25 | Ras-related C3 botulinum toxin substrate 2 (EC 3.6.5.2) (p21-Rac2) | 192 |
| CPT2 | Q2KJB7 | Carnitine O-palmitoyltransferase 2, mitochondrial (EC 2.3.1.21) (Carnitine palmitoyltransferase II) (CPT II) | 658 |
| GBA1 | Q2KHZ8 | Lysosomal acid glucosylceramidase (EC 3.2.1.45) (Acid beta-glucosidase) (Beta-glucocerebrosidase) (Cholesterol glucosyltransferase) (SGTase) (EC 2.4.1.-) (Cholesteryl-beta-glucosidase) (EC 3.2.1.-) (D-glucosyl-N-acylsphingosine glucohydrolase) (Lysosomal cholesterol glycosyltransferase) (Lysosomal galactosylceramidase) (EC 3.2.1.46) (Lysosomal glycosylceramidase) | 536 |
| APOE | Q03247 | Apolipoprotein E (Apo-E) | 316 |
| ASAH1 | Q17QB3 | Acid ceramidase (AC) (ACDase) (Acid CDase) (EC 3.5.1.23) (Acylsphingosine deacylase) (N-acylethanolamine hydrolase ASAH1) (EC 3.5.1.-) (N-acylsphingosine amidohydrolase) [Cleaved into: Acid ceramidase subunit alpha; Acid ceramidase subunit beta] | 395 |
| ASS1 | P14568 | Argininosuccinate synthase (EC 6.3.4.5) (Citrulline--aspartate ligase) | 412 |
| ACACA | Q9TTS3 | Acetyl-CoA carboxylase 1 (ACC1) (EC 6.4.1.2) (ACC-alpha) | 2346 |
| SPARC | P13213 | SPARC (Basement-membrane protein 40) (BM-40) (Osteonectin) (ON) (Secreted protein acidic and rich in cysteine) | 303 |
| PLA2G4A | A4IFJ5 | Cytosolic phospholipase A2 (cPLA2) (Phospholipase A2 group IVA) [Includes: Phospholipase A2 (EC 3.1.1.4) (Phosphatidylcholine 2-acylhydrolase); Lysophospholipase (EC 3.1.1.5)] | 749 |
| ABCG2 | Q4GZT4 | Broad substrate specificity ATP-binding cassette transporter ABCG2 (EC 7.6.2.2) (ATP-binding cassette sub-family G member 2) (Urate exporter) (CD antigen CD338) | 655 |
| CASP3 | Q08DY9 | Caspase-3 (CASP-3) (EC 3.4.22.56) [Cleaved into: Caspase-3 subunit p17; Caspase-3 subunit p12] | 275 |
| NOS3 | P29473 | Nitric oxide synthase 3 (EC 1.14.13.39) (Constitutive NOS) (cNOS) (EC-NOS) (NOS type III) (NOSIII) (Nitric oxide synthase, endothelial) (Endothelial NOS) (eNOS) | 1205 |
| JUN | O77627 | Transcription factor Jun (Activator protein 1) (AP1) (Proto-oncogene c-Jun) (Transcription factor AP-1 subunit Jun) (V-jun avian sarcoma virus 17 oncogene homolog) | 335 |
| MAPT | P29172 | Microtubule-associated protein tau (Neurofibrillary tangle protein) (Paired helical filament-tau) (PHF-tau) | 448 |
| BDNF | Q95106 | Neurotrophic factor BDNF precursor form (proBDNF) (Brain-derived neurotrophic factor) [Cleaved into: Neurotrophic factor BDNF] | 250 |
| CCL2 | P28291 | C-C motif chemokine 2 (Acidic seminal fluid protein) (Monocyte chemotactic protein 1A) (MCP-1) (MCP-1A) (Small-inducible cytokine A2) | 99 |
| MAOA | P21398 | Amine oxidase [flavin-containing] A (EC 1.4.3.21) (EC 1.4.3.4) (Monoamine oxidase type A) (MAO-A) | 527 |
| STAT5B | Q9TUM3 | Signal transducer and activator of transcription 5B | 787 |
| MMP1 | P28053 | Interstitial collagenase (EC 3.4.24.7) (Fibroblast collagenase) (Matrix metalloproteinase-1) (MMP-1) | 469 |
| PHGDH | Q5EAD2 | D-3-phosphoglycerate dehydrogenase (3-PGDH) (EC 1.1.1.95) (2-oxoglutarate reductase) (EC 1.1.1.399) (Malate dehydrogenase) (EC 1.1.1.37) | 533 |
| PLAT | Q28198 | Tissue-type plasminogen activator (t-PA) (t-plasminogen activator) (tPA) (EC 3.4.21.68) [Cleaved into: Tissue-type plasminogen activator chain A; Tissue-type plasminogen activator chain B] | 566 |
| C3 | Q2UVX4 | Complement C3 [Cleaved into: Complement C3 beta chain; Complement C3 alpha chain; C3a anaphylatoxin; C3-beta-c (C3bc); Acylation stimulating protein (ASP) (C3adesArg); Complement C3b (Complement C3b-alpha' chain); Complement C3c alpha' chain fragment 1; Complement C3dg fragment; Complement C3g fragment; Complement C3d fragment; Complement C3f fragment; Complement C3c alpha' chain fragment 2] | 1661 |
| CREB1 | P27925 | Cyclic AMP-responsive element-binding protein 1 (CREB-1) (cAMP-responsive element-binding protein 1) (Cyclic AMP-responsive DNA-binding protein) | 325 |
| CYP11A1 | P00189 | Cholesterol side-chain cleavage enzyme, mitochondrial (EC 1.14.15.6) (CYPXIA1) (Cholesterol desmolase) (Cytochrome P450 11A1) (Cytochrome P450(scc)) | 520 |
| SERPINA1 | P34955 | Alpha-1-antiproteinase (Alpha-1-antitrypsin) (Alpha-1-proteinase inhibitor) (Serpin A1) | 416 |
| SERPINC1 | P41361 | Antithrombin-III (ATIII) (Serpin C1) | 465 |
| P4HB | P05307 | Protein disulfide-isomerase (PDI) (EC 5.3.4.1) (Cellular thyroid hormone-binding protein) (Prolyl 4-hydroxylase subunit beta) (p55) | 510 |
| HSPA8 | P19120 | Heat shock cognate 71 kDa protein (EC 3.6.4.10) (Heat shock 70 kDa protein 8) | 650 |
| ACE2 | Q58DD0 | Angiotensin-converting enzyme 2 (EC 3.4.17.23) (ACE-related carboxypeptidase) (EC 3.4.17.-) [Cleaved into: Processed angiotensin-converting enzyme 2] | 804 |
| VCP | Q3ZBT1 | Transitional endoplasmic reticulum ATPase (TER ATPase) (EC 3.6.4.6) (15S Mg(2+)-ATPase p97 subunit) (Valosin-containing protein) (VCP) | 806 |
| HMGB1 | P10103 | High mobility group protein B1 (High mobility group protein 1) (HMG-1) | 215 |
| PLCG1 | P08487 | 1-phosphatidylinositol 4,5-bisphosphate phosphodiesterase gamma-1 (EC 3.1.4.11) (PLC-148) (Phosphoinositide phospholipase C-gamma-1) (Phospholipase C-II) (PLC-II) (Phospholipase C-gamma-1) (PLC-gamma-1) | 1291 |
| RHOA | P61585 | Transforming protein RhoA (EC 3.6.5.2) (Gb) (p21) | 193 |
| PPIB | P80311 | Peptidyl-prolyl cis-trans isomerase B (PPIase B) (EC 5.2.1.8) (Cyclophilin B) (Rotamase B) (S-cyclophilin) (SCYLP) | 216 |
| F10 | P00743 | Coagulation factor X (EC 3.4.21.6) (Stuart factor) [Cleaved into: Factor X light chain; Factor X heavy chain; Activated factor Xa heavy chain] | 492 |
| NLRP3 | A6QLE5 | NACHT, LRR and PYD domains-containing protein 3 (EC 3.6.4.-) | 1031 |
| B2M | P01888 | Beta-2-microglobulin (Lactollin) | 118 |
| ANPEP | P79098 | Aminopeptidase N (AP-N) (bAPN) (EC 3.4.11.2) (Alanyl aminopeptidase) (Aminopeptidase M) (AP-M) (Microsomal aminopeptidase) (CD antigen CD13) | 965 |
| PRDX1 | Q5E947 | Peroxiredoxin-1 (EC 1.11.1.24) (Thioredoxin-dependent peroxiredoxin 1) | 199 |
| SNAP25 | Q17QQ3 | Synaptosomal-associated protein 25 (SNAP-25) (Synaptosomal-associated 25 kDa protein) | 206 |
| RAC1 | P62998 | Ras-related C3 botulinum toxin substrate 1 (EC 3.6.5.2) (p21-Rac1) | 192 |
| PRKCB | P05126 | Protein kinase C beta type (PKC-B) (PKC-beta) (EC 2.7.11.13) | 671 |
| MYB | P46200 | Transcriptional activator Myb (Proto-oncogene c-Myb) | 640 |
| SGK1 | A7MB74 | Serine/threonine-protein kinase Sgk1 (EC 2.7.11.1) (Serum/glucocorticoid-regulated kinase 1) | 431 |
| STAT5A | Q95115 | Signal transducer and activator of transcription 5A (Mammary gland factor) | 794 |
| TRPC6 | Q9MYW0 | Short transient receptor potential channel 6 (TrpC6) | 931 |
| LEPR | Q3SYT0 | Leptin receptor gene-related protein (Endospanin-1) (OB-R gene-related protein) (OB-RGRP) | 131 |
| ATP1A1 | Q08DA1 | Sodium/potassium-transporting ATPase subunit alpha-1 (Na(+)/K(+) ATPase alpha-1 subunit) (EC 7.2.2.13) (Sodium pump subunit alpha-1) | 1021 |
| ACTN1 | Q3B7N2 | Alpha-actinin-1 (Alpha-actinin cytoskeletal isoform) (F-actin cross-linking protein) (Non-muscle alpha-actinin-1) | 892 |
| MEF2C | Q2KIA0 | Myocyte-specific enhancer factor 2C | 441 |
| YWHAE | P62261 | 14-3-3 protein epsilon (14-3-3E) | 255 |
| ALB | P02769 | Albumin (BSA) (allergen Bos d 6) | 607 |
| FASN | Q71SP7 | Fatty acid synthase (EC 2.3.1.85) [Includes: [Acyl-carrier-protein] S-acetyltransferase (EC 2.3.1.38); [Acyl-carrier-protein] S-malonyltransferase (EC 2.3.1.39); 3-oxoacyl-[acyl-carrier-protein] synthase (EC 2.3.1.41); 3-oxoacyl-[acyl-carrier-protein] reductase (EC 1.1.1.100); 3-hydroxyacyl-[acyl-carrier-protein] dehydratase (EC 4.2.1.59); Enoyl-[acyl-carrier-protein] reductase (EC 1.3.1.39); Acyl-[acyl-carrier-protein] hydrolase (EC 3.1.2.14)] | 2513 |
| CTNNB1 | Q0VCX4 | Catenin beta-1 (Beta-catenin) | 781 |
| TGFBR1 | O46680 | TGF-beta receptor type-1 (TGFR-1) (EC 2.7.11.30) (TGF-beta type I receptor) (Transforming growth factor-beta receptor type I) (TGF-beta receptor type I) (TbetaR-I) | 499 |
| MET | Q769I5 | Hepatocyte growth factor receptor (HGF receptor) (EC 2.7.10.1) (HGF/SF receptor) (Proto-oncogene c-Met) (Scatter factor receptor) (SF receptor) (Tyrosine-protein kinase Met) | 1384 |
| CTSD | P80209 | Cathepsin D (EC 3.4.23.5) | 390 |
| HGF | Q76BS1 | Hepatocyte growth factor (Hepatopoietin-A) (Scatter factor) (SF) [Cleaved into: Hepatocyte growth factor alpha chain; Hepatocyte growth factor beta chain] | 730 |
| CCND1 | Q2KI22 | G1/S-specific cyclin-D1 | 295 |
| PRKACA | P00517 | cAMP-dependent protein kinase catalytic subunit alpha (PKA C-alpha) (EC 2.7.11.11) | 351 |
| HSPB1 | Q3T149 | Heat shock protein beta-1 (HspB1) (Heat shock 27 kDa protein) (HSP 27) | 201 |
| CXCR4 | P25930 | C-X-C chemokine receptor type 4 (CXC-R4) (CXCR-4) (Fusin) (LCR1) (Leukocyte-derived seven transmembrane domain receptor) (LESTR) (Stromal cell-derived factor 1 receptor) (SDF-1 receptor) (CD antigen CD184) | 353 |
| RAD51 | Q2KJ94 | DNA repair protein RAD51 homolog 1 | 339 |
| SMAD2 | Q1W668 | Mothers against decapentaplegic homolog 2 (MAD homolog 2) (Mothers against DPP homolog 2) (SMAD family member 2) (SMAD 2) (Smad2) | 467 |
| PIK3R1 | P23727 | Phosphatidylinositol 3-kinase regulatory subunit alpha (PI3-kinase regulatory subunit alpha) (PI3K regulatory subunit alpha) (PtdIns-3-kinase regulatory subunit alpha) (Phosphatidylinositol 3-kinase 85 kDa regulatory subunit alpha) (PI3-kinase subunit p85-alpha) (PtdIns-3-kinase regulatory subunit p85-alpha) | 724 |
| UCHL1 | P23356 | Ubiquitin carboxyl-terminal hydrolase isozyme L1 (UCH-L1) (EC 3.4.19.12) (Neuron cytoplasmic protein 9.5) (PGP 9.5) (PGP9.5) (Ubiquitin thioesterase L1) | 252 |
| NT5E | Q05927 | 5'-nucleotidase (5'-NT) (EC 3.1.3.35) (EC 3.1.3.5) (EC 3.1.3.89) (EC 3.1.3.91) (EC 3.1.3.99) (5'-deoxynucleotidase) (Ecto-5'-nucleotidase) (IMP-specific 5'-nucleotidase) (Thymidylate 5'-phosphatase) (CD antigen CD73) | 574 |
| GAA | Q9MYM4 | Lysosomal alpha-glucosidase (EC 3.2.1.20) (Acid maltase) | 937 |
| TGFB2 | P21214 | Transforming growth factor beta-2 proprotein (Milk growth factor) (MGF) [Cleaved into: Latency-associated peptide (LAP); Transforming growth factor beta-2 (TGF-beta-2)] | 414 |
| ADA | P56658 | Adenosine deaminase (EC 3.5.4.4) (Adenosine aminohydrolase) | 363 |
| DPYD | Q28007 | Dihydropyrimidine dehydrogenase [NADP(+)] (DHPDHase) (DPD) (EC 1.3.1.2) (Dihydrothymine dehydrogenase) (Dihydrouracil dehydrogenase) | 1025 |
| DBH | P15101 | Dopamine beta-hydroxylase (EC 1.14.17.1) (Dopamine beta-monooxygenase) [Cleaved into: Soluble dopamine beta-hydroxylase] | 610 |
| PRKAR1A | P00514 | cAMP-dependent protein kinase type I-alpha regulatory subunit [Cleaved into: cAMP-dependent protein kinase type I-alpha regulatory subunit, N-terminally processed] | 380 |
| SMARCA4 | A7Z019 | SWI/SNF-related matrix-associated actin-dependent regulator of chromatin subfamily A member 4 (SMARCA4) (EC 3.6.4.-) (BRG1-associated factor 190A) (BAF190A) (Protein brahma homolog 1) (SNF2-beta) (Transcription activator BRG1) | 1606 |
| TLR3 | Q5TJ59 | Toll-like receptor 3 (CD antigen CD283) | 904 |
| MMP14 | Q9GLE4 | Matrix metalloproteinase-14 (MMP-14) (EC 3.4.24.80) (Membrane-type matrix metalloproteinase 1) (MT-MMP 1) (MTMMP1) (Membrane-type-1 matrix metalloproteinase) (MT1-MMP) (MT1MMP) | 582 |
| TH | P17289 | Tyrosine 3-monooxygenase (EC 1.14.16.2) (Tyrosine 3-hydroxylase) (TH) | 491 |
| ACAT1 | Q29RZ0 | Acetyl-CoA acetyltransferase, mitochondrial (EC 2.3.1.9) (Acetoacetyl-CoA thiolase) | 422 |
| ALPL | P09487 | Alkaline phosphatase, tissue-nonspecific isozyme (AP-TNAP) (TNAP) (TNSALP) (EC 3.1.3.1) (Alkaline phosphatase liver/bone/kidney isozyme) (Phosphoamidase) (Phosphocreatine phosphatase) (EC 3.9.1.1) | 524 |
| IFNG | P07353 | Interferon gamma (BoIFNG) (IFN-gamma) | 166 |
| GNAS | O18979 | Neuroendocrine secretory protein 55 (NESP55) [Cleaved into: LSAL tetrapeptide; GAIPIRRH peptide] | 241 |
| GNAS | P04896 | Guanine nucleotide-binding protein G(s) subunit alpha isoforms short (EC 3.6.5.-) (Adenylate cyclase-stimulating G alpha protein) | 394 |
| CD40 | Q28203 | Tumor necrosis factor receptor superfamily member 5 (B-cell surface antigen CD40) (CD40L receptor) (CD antigen CD40) | 280 |
| NPM1 | Q3T160 | Nucleophosmin (NPM) | 294 |
| TBXA2R | Q95125 | Thromboxane A2 receptor (TXA2-R) (Prostanoid TP receptor) | 343 |
| SLC9A1 | Q28036 | Sodium/hydrogen exchanger 1 (Na(+)/H(+) exchanger 1) (NHE-1) (Solute carrier family 9 member 1) | 818 |
| PRKG1 | P00516 | cGMP-dependent protein kinase 1 (cGK 1) (cGK1) (EC 2.7.11.12) (cGMP-dependent protein kinase I) (cGKI) | 671 |
| HK1 | P27595 | Hexokinase-1 (EC 2.7.1.1) (Brain form hexokinase) (Hexokinase type I) (HK I) | 918 |
| CXCR2 | Q28003 | C-X-C chemokine receptor type 2 (CXC-R2) (CXCR-2) (High affinity interleukin-8 receptor B) (IL-8R B) (CD antigen CD182) | 360 |
| TUBB3 | Q2T9S0 | Tubulin beta-3 chain | 450 |
| EDNRB | P28088 | Endothelin receptor type B (ET-B) (ET-BR) (Endothelin receptor non-selective type) | 441 |
| FTH1 | O46414 | Ferritin heavy chain (Ferritin H subunit) (EC 1.16.3.1) [Cleaved into: Ferritin heavy chain, N-terminally processed] | 181 |
| DLD | F1N206 | Dihydrolipoyl dehydrogenase, mitochondrial (EC 1.8.1.4) (Dihydrolipoamide dehydrogenase) | 509 |
| GAD1 | Q0VCA1 | Glutamate decarboxylase 1 (EC 4.1.1.15) | 594 |
| COL1A1 | P02453 | Collagen alpha-1(I) chain (Alpha-1 type I collagen) | 1463 |
| ARG1 | Q2KJ64 | Arginase-1 (EC 3.5.3.1) (Liver-type arginase) (Type I arginase) | 322 |
| GLB1 | Q58D55 | Beta-galactosidase (EC 3.2.1.23) (Acid beta-galactosidase) (Lactase) | 653 |
| CTSK | Q5E968 | Cathepsin K (EC 3.4.22.38) | 329 |
| GSTP1 | P28801 | Glutathione S-transferase P (EC 2.5.1.18) (GST class-pi) | 210 |
| COL2A1 | P02459 | Collagen alpha-1(II) chain (Alpha-1 type II collagen) | 1487 |
| PGK1 | Q3T0P6 | Phosphoglycerate kinase 1 (EC 2.7.11.1) (EC 2.7.2.3) | 417 |
| CD40LG | P51749 | CD40 ligand (CD40-L) (Tumor necrosis factor ligand superfamily member 5) (CD antigen CD154) [Cleaved into: CD40 ligand, membrane form; CD40 ligand, soluble form (sCD40L)] | 261 |
| PNP | P55859 | Purine nucleoside phosphorylase (PNP) (EC 2.4.2.1) (Inosine phosphorylase) (Inosine-guanosine phosphorylase) | 289 |
| TNFRSF1A | O19131 | Tumor necrosis factor receptor superfamily member 1A (Tumor necrosis factor receptor 1) (TNF-R1) (Tumor necrosis factor receptor type I) (TNF-RI) (TNFR-I) (p55) (p60) (CD antigen CD120a) | 471 |
| ADRB2 | Q28044 | Beta-2 adrenergic receptor (Beta-2 adrenoreceptor) (Beta-2 adrenoceptor) | 418 |
| IL1RN | O77482 | Interleukin-1 receptor antagonist protein (IL-1RN) (IL-1ra) (IRAP) (IL1 inhibitor) | 174 |
| ITGB1 | P53712 | Integrin beta-1 (Fibronectin receptor subunit beta) (VLA-4 subunit beta) (CD antigen CD29) | 798 |
| DPP4 | P81425 | Dipeptidyl peptidase 4 (EC 3.4.14.5) (Activation molecule 3) (ACT3) (Adenosine deaminase complexing protein) (ADCP-I) (Dipeptidyl peptidase IV) (DPP IV) (T-cell activation antigen CD26) (WC10) (CD antigen CD26) [Cleaved into: Dipeptidyl peptidase 4 membrane form (Dipeptidyl peptidase IV membrane form); Dipeptidyl peptidase 4 soluble form (Dipeptidyl peptidase IV soluble form)] | 765 |
| DRD2 | P20288 | D(2) dopamine receptor (Dopamine D2 receptor) | 444 |
| LYN | O97790 | TBC1 domain family member 1 (Lyncein) | 1165 |
| MYD88 | Q599T9 | Myeloid differentiation primary response protein MyD88 | 296 |
| MGMT | P29177 | Methylated-DNA--protein-cysteine methyltransferase (EC 2.1.1.63) (6-O-methylguanine-DNA methyltransferase) (MGMT) (O-6-methylguanine-DNA-alkyltransferase) | 9 |
| EIF4E | Q9N0T5 | Eukaryotic translation initiation factor 4E (eIF-4E) (eIF4E) (mRNA cap-binding protein) | 217 |
| ITPR1 | Q9TU34 | Inositol 1,4,5-trisphosphate-gated calcium channel ITPR1 (IP3 receptor isoform 1) (IP3R 1) (InsP3R1) (Inositol 1,4,5-trisphosphate receptor type 1) (Type 1 inositol 1,4,5-trisphosphate receptor) (Type 1 InsP3 receptor) | 2709 |
| EDNRA | P21450 | Endothelin-1 receptor (Endothelin receptor type A) (ET-A) (ET-AR) | 427 |
| FGA | P02672 | Fibrinogen alpha chain [Cleaved into: Fibrinopeptide A; Fibrinogen alpha chain] | 615 |
| PCSK1 | Q9GLR1 | Neuroendocrine convertase 1 (NEC 1) (EC 3.4.21.93) (Prohormone convertase 1) (Proprotein convertase 1) (PC1) | 753 |
| ADRB1 | Q9TT96 | Beta-1 adrenergic receptor (Beta-1 adrenoreceptor) (Beta-1 adrenoceptor) | 467 |
| HSP90AB1 | Q76LV1 | Heat shock protein HSP 90-beta | 724 |
| STIM1 | Q58CP9 | Stromal interaction molecule 1 | 683 |
| SCNN1A | P55270 | Epithelial sodium channel subunit alpha (Alpha-ENaC) (Epithelial Na(+) channel subunit alpha) (Alpha-NaCH) (Amiloride-sensitive sodium channel subunit alpha) (Nonvoltage-gated sodium channel 1 subunit alpha) (SCNEA) | 650 |
| ENTPD1 | O18956 | Ectonucleoside triphosphate diphosphohydrolase 1 (EC 3.6.1.5) (ATP diphosphohydrolase) (ATP-DPH) (ATPDase) (Ecto-ATP diphosphohydrolase 1) (Ecto-ATPDase 1) (Ecto-ATPase 1) (Ecto-apyrase) (Lymphoid cell activation antigen) (Nucleoside triphosphate diphosphohydrolase 1) (NTPDase1) (CD antigen CD39) | 513 |
| CSNK1D | P35508 | Casein kinase I isoform delta (CKI-delta) (CKId) (EC 2.7.11.1) (Tau-protein kinase CSNK1D) (EC 2.7.11.26) | 415 |
| RAB7A | Q3T0F5 | Ras-related protein Rab-7a (EC 3.6.5.2) | 207 |
| PI4KA | O02811 | Phosphatidylinositol 4-kinase alpha (PI4-kinase alpha) (PI4K-alpha) (PtdIns-4-kinase alpha) (EC 2.7.1.67) | 2102 |
| INS | P01317 | Insulin [Cleaved into: Insulin B chain; Insulin A chain] | 105 |
| SMPD1 | Q0VD19 | Sphingomyelin phosphodiesterase (EC 3.1.4.12) (EC 3.1.4.3) (Acid sphingomyelinase) (aSMase) [Cleaved into: Sphingomyelin phosphodiesterase, processed form] | 625 |
| GFAP | Q28115 | Glial fibrillary acidic protein (GFAP) | 428 |
| LIPE | P16386 | Hormone-sensitive lipase (HSL) (EC 3.1.1.79) (Monoacylglycerol lipase LIPE) (EC 3.1.1.23) (Retinyl ester hydrolase) (REH) | 756 |
| TTR | O46375 | Transthyretin (Prealbumin) | 147 |
| IGF1 | P07455 | Insulin-like growth factor 1 (Insulin-like growth factor I) (IGF-I) (Somatomedin) | 154 |
| OAT | Q3ZCF5 | Ornithine aminotransferase, mitochondrial (EC 2.6.1.13) (Ornithine--oxo-acid aminotransferase) | 439 |
| DHFR | P00376 | Dihydrofolate reductase (EC 1.5.1.3) | 187 |
| HPRT1 | Q3SZ18 | Hypoxanthine-guanine phosphoribosyltransferase (HGPRT) (HGPRTase) (EC 2.4.2.8) | 218 |
| TYR | Q8MIU0 | Tyrosinase (EC 1.14.18.1) (Monophenol monooxygenase) | 530 |
| PSAP | P26779 | Prosaposin (Proactivator polypeptide) [Cleaved into: Saposin-A (Protein A); Saposin-B (Cerebroside sulfate activator) (CSAct) (Dispersin) (Sphingolipid activator protein 1) (SAP-1) (Sulfatide/GM1 activator); Saposin-C (A1 activator) (Co-beta-glucosidase) (Glucosylceramidase activator) (Sphingolipid activator protein 2) (SAP-2); Saposin-D (Component C) (Protein C)] | 525 |
| FURIN | Q28193 | Furin (EC 3.4.21.75) (Dibasic-processing enzyme) (Paired basic amino acid residue-cleaving enzyme) (PACE) (Trans Golgi network protease furin) | 797 |
| GLUL | P15103 | Glutamine synthetase (GS) (EC 6.3.1.2) (Glutamate--ammonia ligase) (Palmitoyltransferase GLUL) (EC 2.3.1.225) | 373 |
| SLC25A4 | P02722 | ADP/ATP translocase 1 (ADP,ATP carrier protein 1) (ADP,ATP carrier protein, heart isoform T1) (Adenine nucleotide translocator 1) (ANT 1) (Solute carrier family 25 member 4) | 298 |
| POR | Q3SYT8 | NADPH--cytochrome P450 reductase (CPR) (P450R) (EC 1.6.2.4) | 678 |
| CYCS | P62894 | Cytochrome c | 105 |
| CAV1 | P79132 | Caveolin-1 | 178 |
| SDHB | Q3T189 | Succinate dehydrogenase [ubiquinone] iron-sulfur subunit, mitochondrial (EC 1.3.5.1) (Iron-sulfur subunit of complex II) (IP) (Malate dehydrogenase [quinone] iron-sulfur subunit) (EC 1.1.5.-) | 280 |
| HIF1A | Q9XTA5 | Hypoxia-inducible factor 1-alpha (HIF-1-alpha) (HIF1-alpha) | 823 |
| CD44 | Q29423 | CD44 antigen (Extracellular matrix receptor III) (ECMR-III) (GP90 lymphocyte homing/adhesion receptor) (HUTCH-I) (Hermes antigen) (Hyaluronate receptor) (Phagocytic glycoprotein 1) (PGP-1) (Phagocytic glycoprotein I) (PGP-I) (CD antigen CD44) | 366 |
| DNM1L | Q2KIA5 | Dynamin-1-like protein (EC 3.6.5.5) | 749 |
| COL3A1 | P04258 | Collagen alpha-1(III) chain | 1049 |
| VWF | P80012 | von Willebrand factor (vWF) | 937 |
| MUC1 | Q8WML4 | Mucin-1 (MUC-1) (CD antigen CD227) [Cleaved into: Mucin-1 subunit alpha (MUC1-NT) (MUC1-alpha); Mucin-1 subunit beta (MUC1-beta) (MUC1-CT)] | 580 |
| KNG1 | P01044 | Kininogen-1 (Kininogen I) (Thiol proteinase inhibitor) [Cleaved into: Kininogen-1 heavy chain; Bradykinin (Kallidin I); Lysyl-bradykinin (Kallidin II); Kininogen-1 light chain] | 621 |
| HSPD1 | P31081 | 60 kDa heat shock protein, mitochondrial (EC 5.6.1.7) (60 kDa chaperonin) (Chaperonin 60) (CPN60) (Heat shock protein 60) (HSP-60) (Hsp60) (Mitochondrial matrix protein P1) | 573 |
| COL1A2 | P02465 | Collagen alpha-2(I) chain (Alpha-2 type I collagen) | 1364 |
| ODC1 | P27117 | Ornithine decarboxylase (ODC) (EC 4.1.1.17) | 461 |
| VEGFA | P15691 | Vascular endothelial growth factor A (VEGF-A) (Vascular permeability factor) (VPF) | 190 |
| SOD2 | P41976 | Superoxide dismutase [Mn], mitochondrial (EC 1.15.1.1) | 222 |
| ABCC1 | Q8HXQ5 | Multidrug resistance-associated protein 1 (EC 7.6.2.2) (ATP-binding cassette sub-family C member 1) (Glutathione-S-conjugate-translocating ATPase ABCC1) (EC 7.6.2.3) (Leukotriene C(4) transporter) (LTC4 transporter) | 1530 |
| IGF2 | P07456 | Insulin-like growth factor 2 (Erythrotropin) (Insulin-like growth factor II) (IGF-II) [Cleaved into: Preptin] | 179 |
| EDN1 | P17322 | Endothelin-1 (ET-1) (Preproendothelin-1) (PPET1) [Cleaved into: Big endothelin-1] | 202 |
| HSPA5 | Q0VCX2 | Endoplasmic reticulum chaperone BiP (EC 3.6.4.10) (78 kDa glucose-regulated protein) (GRP-78) (Binding-immunoglobulin protein) (BiP) (Heat shock protein 70 family protein 5) (HSP70 family protein 5) (Heat shock protein family A member 5) (Immunoglobulin heavy chain-binding protein) | 655 |
| PFKM | Q0IIG5 | ATP-dependent 6-phosphofructokinase, muscle type (ATP-PFK) (PFK-M) (EC 2.7.1.11) (6-phosphofructokinase type A) (Phosphofructo-1-kinase isozyme A) (PFK-A) (Phosphohexokinase) | 779 |
| CYBB | O46522 | NADPH oxidase 2 (EC 1.6.3.-) (CGD91-phox) (Cytochrome b(558) subunit beta) (Cytochrome b558 subunit beta) (Cytochrome b-245 heavy chain) (Heme-binding membrane glycoprotein gp91phox) (Neutrophil cytochrome b 91 kDa polypeptide) (gp91-1) (gp91-phox) (p22 phagocyte B-cytochrome) | 570 |
| NCAM1 | P31836 | Neural cell adhesion molecule 1 (N-CAM-1) (NCAM-1) | 853 |
| TSHR | Q27987 | Thyrotropin receptor (Thyroid-stimulating hormone receptor) (TSH-R) | 763 |
| FUCA1 | Q2KIM0 | Tissue alpha-L-fucosidase (EC 3.2.1.51) (Alpha-L-fucosidase I) (Alpha-L-fucoside fucohydrolase 1) (Alpha-L-fucosidase 1) | 468 |
| ERCC2 | A6QLJ0 | General transcription and DNA repair factor IIH helicase subunit XPD (TFIIH subunit XPD) (EC 5.6.2.3) (CXPD) (DNA 5'-3' helicase XPD) (DNA excision repair protein ERCC-2) (DNA repair protein complementing XP-D cells) (Xeroderma pigmentosum group D-complementing protein) | 760 |
| DES | O62654 | Desmin | 470 |
| CAPN3 | P51186 | Calpain-3 (EC 3.4.22.54) (Calcium-activated neutral proteinase 3) (CANP 3) (Calpain L3) (Calpain p94) (Muscle-specific calcium-activated neutral protease 3) (New calpain 1) (nCL-1) | 822 |
| KCNMA1 | Q28204 | Calcium-activated potassium channel subunit alpha-1 (BK channel) (BKCA alpha) (Calcium-activated potassium channel, subfamily M subunit alpha-1) (K(VCA)alpha) (KCa1.1) (Maxi K channel) (MaxiK) (Slo-alpha) (Slo1) (Slowpoke homolog) (Slo homolog) (bSlo) | 1166 |
| PLCB1 | P10894 | 1-phosphatidylinositol 4,5-bisphosphate phosphodiesterase beta-1 (EC 3.1.4.11) (PLC-154) (Phosphoinositide phospholipase C-beta-1) (Phospholipase C-beta-1) (PLC-beta-1) | 1216 |
| MIF | P80177 | Macrophage migration inhibitory factor (MIF) (EC 5.3.2.1) (L-dopachrome isomerase) (L-dopachrome tautomerase) (EC 5.3.3.12) (Phenylpyruvate tautomerase) (p12A) | 115 |
| TNNT2 | P13789 | Troponin T, cardiac muscle (TnTc) (Cardiac muscle troponin T) (cTnT) | 285 |
| NCF2 | O77775 | Neutrophil cytosol factor 2 (NCF-2) (67 kDa neutrophil oxidase factor) (Neutrophil NADPH oxidase factor 2) (p67-phox) | 527 |
| NR2F2 | Q9TTR7 | COUP transcription factor 2 (COUP-TF2) (COUP transcription factor II) (COUP-TF II) (Nuclear receptor subfamily 2 group F member 2) | 414 |
| CD8A | P31783 | T-cell surface glycoprotein CD8 alpha chain (CD antigen CD8a) | 242 |
| ERCC3 | Q1RMT1 | General transcription and DNA repair factor IIH helicase/translocase subunit XPB (TFIIH subunit XPB) (EC 5.6.2.4) (DNA 3'-5' helicase/translocase XPB) (DNA excision repair protein ERCC-3) | 782 |
| KCNJ5 | F1MYR9 | G protein-activated inward rectifier potassium channel 4 (GIRK-4) (Cardiac inward rectifier) (Heart KATP channel) (Inward rectifier K(+) channel Kir3.4) (KATP-1) (Potassium channel, inwardly rectifying subfamily J member 5) | 419 |
| JUP | Q8SPJ1 | Junction plakoglobin (Desmoplakin III) (Desmoplakin-3) | 745 |
| CSNK2B | P67868 | Casein kinase II subunit beta (CK II beta) (Phosvitin) | 215 |
| TPM1 | Q5KR49 | Tropomyosin alpha-1 chain (Alpha-tropomyosin) (Tropomyosin-1) | 284 |
| CASP6 | Q3T0P5 | Caspase-6 (CASP-6) (EC 3.4.22.59) [Cleaved into: Caspase-6 subunit p18; Caspase-6 subunit p11] | 293 |
| TNNI3 | P08057 | Troponin I, cardiac muscle (Cardiac troponin I) | 212 |
| MYL2 | Q3SZE5 | Myosin regulatory light chain 2, ventricular/cardiac muscle isoform (MLC-2) (MLC-2v) (Myosin light chain 2, slow skeletal/ventricular muscle isoform) (MLC-2s/v) | 166 |
| KCNJ2 | O19182 | Inward rectifier potassium channel 2 (BIK) (Inward rectifier K(+) channel Kir2.1) (IRK-1) (Potassium channel, inwardly rectifying subfamily J member 2) | 427 |
| HTR2A | Q75Z89 | 5-hydroxytryptamine receptor 2A (5-HT-2) (5-HT-2A) (Serotonin receptor 2A) | 470 |
| IL2RG | Q95118 | Cytokine receptor common subunit gamma (Interleukin-2 receptor subunit gamma) (IL-2 receptor subunit gamma) (IL-2R subunit gamma) (IL-2RG) (gammaC) (p64) (CD antigen CD132) | 379 |
| ROCK1 | Q8MIT6 | Rho-associated protein kinase 1 (EC 2.7.11.1) (Rho-associated, coiled-coil-containing protein kinase 1) (Rho-associated, coiled-coil-containing protein kinase I) (ROCK-I) (p160 ROCK-1) (p160ROCK) | 441 |
| ENO1 | Q9XSJ4 | Alpha-enolase (EC 4.2.1.11) (2-phospho-D-glycerate hydro-lyase) (Enolase 1) (HAP47) (Non-neural enolase) (NNE) (Phosphopyruvate hydratase) | 434 |
| HDAC1 | Q32PJ8 | Histone deacetylase 1 (HD1) (EC 3.5.1.98) (Protein deacetylase HDAC1) (EC 3.5.1.-) (Protein deacylase HDAC1) (EC 3.5.1.-) | 482 |
| NOC2L | Q3SYU1 | Nucleolar complex protein 2 homolog (Protein NOC2 homolog) (NOC2-like protein) (Novel INHAT repressor) | 746 |
| PERM1 | A5D7L8 | PGC-1 and ERR-induced regulator in muscle protein 1 (PPARGC1 and ESRR-induced regulator in muscle 1) (Peroxisome proliferator-activated receptor gamma coactivator 1 and estrogen-related receptor-induced regulator in muscle 1) | 901 |
| ISG15 | O02741 | Ubiquitin-like protein ISG15 (Interferon-stimulated gene product 17) (Ubiquitin cross-reactive protein) (BoUCRP) | 154 |
| INTS11 | Q2YDM2 | Integrator complex subunit 11 (Int11) (EC 3.1.27.-) (Cleavage and polyadenylation-specific factor 3-like protein) (CPSF3-like protein) | 599 |
| CPTP | Q0VCQ0 | Ceramide-1-phosphate transfer protein (Glycolipid transfer protein domain-containing protein 1) (CPTP) | 214 |
| MXRA8 | Q148M6 | Matrix remodeling-associated protein 8 (Limitrin) | 463 |
| VWA1 | A6QLN9 | von Willebrand factor A domain-containing protein 1 | 413 |
| SSU72 | Q17QI2 | RNA polymerase II subunit A C-terminal domain phosphatase SSU72 (CTD phosphatase SSU72) (EC 3.1.3.16) | 194 |
| GNB1 | P62871 | Guanine nucleotide-binding protein G(I)/G(S)/G(T) subunit beta-1 (Transducin beta chain 1) | 340 |
| FAAP20 | A5PKK9 | Fanconi anemia core complex-associated protein 20 (FANCA-associated protein of 20 kDa) (Fanconi anemia-associated protein of 20 kDa) | 192 |
| RER1 | A5PJ65 | Protein RER1 | 196 |
| DFFB | Q58CZ0 | DNA fragmentation factor subunit beta (EC 3.-.-.-) | 341 |
| KCNAB2 | Q27955 | Voltage-gated potassium channel subunit beta-2 (EC 1.1.1.-) (K(+) channel subunit beta-2) (Kv-beta-2) | 367 |
| NOL9 | E1BPN0 | Polynucleotide 5'-hydroxyl-kinase NOL9 (EC 2.7.1.78) (Nucleolar protein 9) | 694 |
| PARK7 | Q5E946 | Parkinson disease protein 7 homolog (Maillard deglycase) (Parkinsonism-associated deglycase) (Protein DJ-1) (DJ-1) (Protein/nucleic acid deglycase DJ-1) (EC 3.1.2.-, EC 3.5.1.-, EC 3.5.1.124) | 189 |
| NMNAT1 | Q0VD50 | Nicotinamide/nicotinic acid mononucleotide adenylyltransferase 1 (NMN/NaMN adenylyltransferase 1) (EC 2.7.7.1) (EC 2.7.7.18) (Nicotinamide mononucleotide adenylyltransferase 1) (NMN adenylyltransferase 1) (Nicotinate-nucleotide adenylyltransferase 1) (NaMN adenylyltransferase 1) | 281 |
| CENPS | Q2TBR7 | Centromere protein S (CENP-S) (Apoptosis-inducing TAF9-like domain-containing protein 1 homolog) (FANCM-interacting histone fold protein 1) | 138 |
| ANGPTL7 | Q5EA66 | Angiopoietin-related protein 7 (Angiopoietin-like protein 7) | 344 |
| MTHFR | Q5I598 | Methylenetetrahydrofolate reductase (NADPH) (EC 1.5.1.53) | 655 |
| NPPA | P07501 | Natriuretic peptides A (Atrial natriuretic factor prohormone) (preproANF) (proANF) (Atrial natriuretic peptide prohormone) (preproANP) (proANP) (Atriopeptigen) (Cardiodilatin) (CDD) (preproCDD-ANF) [Cleaved into: Long-acting natriuretic peptide (LANP) (Long-acting natriuretic hormone) (LANH) (Pro atrial natriuretic factor 1-30) (proANF 1-30) (Pro atrial natriuretic peptide 1-30) (proANP 1-30); Vessel dilator (VSDL) (Pro atrial natriuretic factor 31-67) (proANF 31-67) (Pro atrial natriuretic peptide 31-67) (proANP 31-67); Kaliuretic peptide (KP) (Pro atrial natriuretic factor 79-98) (proANF 79-98) (Pro atrial natriuretic peptide 79-98) (proANP 79-98); Urodilatin (URO) (CDD 95-126) (CDD-ANP (95-126)) (Pro atrial natriuretic peptide 95-126) (proANP 95-126); Auriculin-C (Atrial natriuretic factor 1-33) (ANF 1-33); Auriculin-D (Atrial natriuretic factor 3-33) (ANF 3-33); Atrial natriuretic peptide (ANP) (Alpha-atrial natriuretic peptide) (Alpha-hANP) (Atrial natriuretic factor) (ANF) (CDD-ANF) (CDD-ANP (99-126)) (Cardionatrin) (Pro atrial natriuretic factor 99-126) (proANF 99-126); Auriculin-B (Atrial natriuretic factor 8-33) (ANF 8-33); Auriculin-A; Atriopeptin-1 (Atriopeptin I); Atriopeptin-2 (Atriopeptin II); Atriopeptin-3 (Atriopeptin III)] | 152 |
| PLOD1 | O77588 | Procollagen-lysine,2-oxoglutarate 5-dioxygenase 1 (EC 1.14.11.4) (Lysyl hydroxylase 1) (LH1) | 726 |
| DHRS3 | O77769 | Short-chain dehydrogenase/reductase 3 (EC 1.1.1.300) (Retinal short-chain dehydrogenase/reductase 1) (retSDR1) | 302 |
| EFHD2 | A5D7A0 | EF-hand domain-containing protein D2 (Swiprosin-1) | 242 |
| CTRC | Q7M3E1 | Chymotrypsin-C (EC 3.4.21.2) (bPTLP) | 268 |
| CELA2A | Q29461 | Chymotrypsin-like elastase family member 2A (EC 3.4.21.71) (Elastase II) (Elastase-2) (Elastase-2A) | 269 |
| FBLIM1 | Q1JQB5 | Filamin-binding LIM protein 1 (FBLP-1) | 378 |
| MFAP2 | P27424 | Microfibrillar-associated protein 2 (MFAP-2) (Microfibril-associated glycoprotein 1) (MAGP) (MAGP-1) (Tropoelastin-binding protein) | 183 |
| ALDH4A1 | A7YWE4 | Delta-1-pyrroline-5-carboxylate dehydrogenase, mitochondrial (P5C dehydrogenase) (EC 1.2.1.88) (Aldehyde dehydrogenase family 4 member A1) (L-glutamate gamma-semialdehyde dehydrogenase) | 563 |
| PLA2G2A | Q56JZ2 | Phospholipase A2, membrane associated (EC 3.1.1.4) (GIIC sPLA2) (Group IIA phospholipase A2) (Phosphatidylcholine 2-acylhydrolase 2A) | 144 |
| DDOST | A6QPY0 | Dolichyl-diphosphooligosaccharide--protein glycosyltransferase 48 kDa subunit (DDOST 48 kDa subunit) (Oligosaccharyl transferase 48 kDa subunit) | 439 |
| ECE1 | P42891 | Endothelin-converting enzyme 1 (ECE-1) (EC 3.4.24.71) | 754 |
| C1QA | Q5E9E3 | Complement C1q subcomponent subunit A | 244 |
| C1QB | Q2KIV9 | Complement C1q subcomponent subunit B | 247 |
| RPL11 | Q3T087 | Large ribosomal subunit protein uL5 (60S ribosomal protein L11) | 178 |
| GALE | Q3T105 | UDP-glucose 4-epimerase (EC 5.1.3.2) (Galactowaldenase) (UDP-N-acetylglucosamine 4-epimerase) (UDP-GlcNAc 4-epimerase) (EC 5.1.3.7) (UDP-galactosamine 4-epimerase) (UDP-GalNAc 4-epimerase) (UDP-galactose 4-epimerase) | 348 |
| HMGCL | Q29448 | Hydroxymethylglutaryl-CoA lyase, mitochondrial (HL) (HMG-CoA lyase) (EC 4.1.3.4) (3-hydroxy-3-methylglutarate-CoA lyase) | 325 |
| PNRC2 | Q0VCW6 | Proline-rich nuclear receptor coactivator 2 | 139 |
| STPG1 | A6QQ60 | O(6)-methylguanine-induced apoptosis 2 (MAPO2) (Sperm-tail PG-rich repeat-containing protein 1) | 335 |
| CLIC4 | Q9XSA7 | Chloride intracellular channel protein 4 (Glutaredoxin-like oxidoreductase CLIC4) (EC 1.8.-.-) (Intracellular chloride ion channel protein p64H1) | 253 |
| AUNIP | A4IFU8 | Aurora kinase A- and ninein-interacting protein | 357 |
| SH3BGRL3 | Q3ZCL8 | SH3 domain-binding glutamic acid-rich-like protein 3 | 93 |
| SFN | Q0VC36 | 14-3-3 protein sigma (Stratifin) | 248 |
| NUDC | Q17QG2 | Nuclear migration protein nudC (Nuclear distribution protein C homolog) | 332 |
| TENT5B | Q29RH2 | Terminal nucleotidyltransferase 5B (EC 2.7.7.19) (Non-canonical poly(A) polymerase FAM46B) | 430 |
| WASF2 | A2VDK6 | Actin-binding protein WASF2 (Wiskott-Aldrich syndrome protein family member 2) (WASP family protein member 2) | 493 |
| PTAFR | Q9TTY5 | Platelet-activating factor receptor (PAF-R) (PAFr) | 342 |
| TRNAU1AP | Q1RMJ7 | tRNA selenocysteine 1-associated protein 1 (tRNA selenocysteine-associated protein 1) | 287 |
| GMEB1 | Q2HJ87 | Glucocorticoid modulatory element-binding protein 1 (GMEB-1) | 563 |
| YTHDF2 | Q0VCZ3 | YTH domain-containing family protein 2 | 580 |
| EPB41 | Q9N179 | Protein 4.1 (P4.1) (4.1R) (Band 4.1) (Erythrocyte membrane protein band 4.1) | 617 |
| MECR | Q7YS70 | Enoyl-[acyl-carrier-protein] reductase, mitochondrial (EC 1.3.1.104) (2-enoyl thioester reductase) (Nuclear receptor-binding factor 1) (BtNrbf-1) (NRBF-1) | 373 |
| LAPTM5 | Q2KJA5 | Lysosomal-associated transmembrane protein 5 (Lysosomal-associated multitransmembrane protein 5) | 264 |
| YARS1 | Q29465 | Tyrosine--tRNA ligase, cytoplasmic (EC 6.1.1.1) (Tyrosyl-tRNA synthetase) (TyrRS) [Cleaved into: Tyrosine--tRNA ligase, cytoplasmic, N-terminally processed] | 528 |
| AK2 | P08166 | Adenylate kinase 2, mitochondrial (AK 2) (EC 2.7.4.3) (ATP-AMP transphosphorylase 2) (ATP:AMP phosphotransferase) (Adenylate monophosphate kinase) [Cleaved into: Adenylate kinase 2, mitochondrial, N-terminally processed] | 241 |
| HMGB4 | Q32L34 | High mobility group protein B4 | 194 |
| GJB3 | Q58D78 | Gap junction beta-3 protein (Connexin-31) (Cx31) | 270 |
| GJA4 | A4IFL1 | Gap junction alpha-4 protein (Connexin-37) (Cx37) | 333 |
| NCDN | Q2KJ97 | Neurochondrin | 729 |
| TEKT2 | Q2T9Q6 | Tektin-2 | 430 |
| ADPRS | Q3SYV9 | ADP-ribosylhydrolase ARH3 (ADP-ribose glycohydrolase ARH3) (ADP-ribosylhydrolase 3) (O-acetyl-ADP-ribose deacetylase ARH3) (EC 3.5.1.-) (Poly(ADP-ribose) glycohydrolase ARH3) (EC 3.2.1.143) ([Protein ADP-ribosylarginine] hydrolase-like protein 2) ([Protein ADP-ribosylserine] hydrolase) (EC 3.2.2.-) | 365 |
| ZC3H12A | A6QQJ8 | Ribonuclease ZC3H12A (EC 3.1.-.-) (Zinc finger CCCH domain-containing protein 12A) | 583 |
| YRDC | Q0VC80 | Threonylcarbamoyl-AMP synthase (EC 2.7.7.87) | 276 |
| HEYL | Q2NL18 | Hairy/enhancer-of-split related with YRPW motif-like protein | 328 |
| HPCAL4 | P29104 | Hippocalcin-like protein 4 (Neurocalcin-beta) | 191 |
| PPT1 | P45478 | Palmitoyl-protein thioesterase 1 (PPT-1) (EC 3.1.2.2) (EC 3.1.2.22) (Palmitoyl-protein hydrolase 1) | 306 |
| COL9A2 | C0HLN2 | Collagen alpha-2(IX) chain (Collagen type IX alpha 2 chain) | 688 |
| ZFP69 | A7MBI1 | Zinc finger protein 69 homolog (Zinc finger protein 642) | 524 |
| EXO5 | A2VDX7 | Exonuclease V (Exo V) (EC 3.1.-.-) (Defects in morphology protein 1 homolog) | 370 |
| YBX1 | P67808 | Y-box-binding protein 1 (YB-1) (DNA-binding protein B) (DBPB) (Enhancer factor I subunit A) (EFI-A) (Y-box transcription factor) | 324 |
| SVBP | Q32LJ0 | Small vasohibin-binding protein (Coiled coil domain-containing protein 23) | 66 |
| DPH2 | Q08DM2 | 2-(3-amino-3-carboxypropyl) histidine synthase subunit 2 (Diphthamide biosynthesis protein 2) (Diphtheria toxin resistance protein 2) (S-adenosyl-L-methionine:L-histidine 3-amino-3-carboxypropyltransferase 2) | 489 |
| RNF220 | Q08DV5 | E3 ubiquitin-protein ligase RNF220 (EC 2.3.2.27) (RING finger protein 220) (RING-type E3 ubiquitin transferase RNF220) | 566 |
| TMEM53 | Q2TBP5 | Transmembrane protein 53 | 294 |
| EIF2B3 | A5PJI7 | Translation initiation factor eIF2B subunit gamma (eIF2B GDP-GTP exchange factor subunit gamma) | 452 |
| TOE1 | Q17QN2 | Target of EGR1 protein 1 | 524 |
| MMACHC | Q5E9C8 | Cyanocobalamin reductase / alkylcobalamin dealkylase (Alkylcobalamin:glutathione S-alkyltransferase) (EC 2.5.1.151) (CblC) (Cyanocobalamin reductase (cyanide-eliminating)) (EC 1.16.1.6) (Methylmalonic aciduria and homocystinuria type C protein) (MMACHC) | 280 |
| NASP | Q2T9P4 | Nuclear autoantigenic sperm protein (NASP) | 777 |
| POMGNT1 | Q5EAB6 | Protein O-linked-mannose beta-1,2-N-acetylglucosaminyltransferase 1 (POMGnT1) (EC 2.4.1.-) | 660 |
| UQCRH | P00126 | Cytochrome b-c1 complex subunit 6, mitochondrial (Complex III subunit 6) (Complex III subunit VIII) (Cytochrome c1 non-heme 11 kDa protein) (Mitochondrial hinge protein) (Ubiquinol-cytochrome c reductase complex 11 kDa protein) | 91 |
| NSUN4 | Q0V8R7 | 5-cytosine rRNA methyltransferase NSUN4 (EC 2.1.1.-) (5-cytosine tRNA methyltransferase NSUN4) (EC 2.1.1.-) (NOL1/NOP2/Sun domain family member 4) | 384 |
| CMPK1 | Q2KIW9 | UMP-CMP kinase (EC 2.7.4.14) (Deoxycytidylate kinase) (CK) (dCMP kinase) (Nucleoside-diphosphate kinase) (EC 2.7.4.6) (Uridine monophosphate/cytidine monophosphate kinase) (UMP/CMP kinase) (UMP/CMPK) | 196 |
| SPATA6 | Q2KJG1 | Spermatogenesis-associated protein 6 | 487 |
| TXNDC12 | Q5E936 | Thioredoxin domain-containing protein 12 (EC 1.8.4.2) | 172 |
| ORC1 | Q58DC8 | Origin recognition complex subunit 1 | 863 |
| GPX7 | A6QLY2 | Glutathione peroxidase 7 (GPx-7) (GSHPx-7) (EC 1.11.1.9) | 186 |
| SCP2 | P07857 | Sterol carrier protein 2 (SCP-2) (Acetyl-CoA C-myristoyltransferase) (EC 2.3.1.155) (Non-specific lipid-transfer protein) (NSL-TP) (Propanoyl-CoA C-acyltransferase) (EC 2.3.1.176) (SCP-2/3-oxoacyl-CoA thiolase) (SCP-2/thiolase) (EC 2.3.1.16) (SCP-chi) (SCPX) (Sterol carrier protein X) (SCP-X) | 543 |
| OMA1 | Q3SZN3 | Metalloendopeptidase OMA1, mitochondrial (EC 3.4.24.-) (Overlapping with the m-AAA protease 1 homolog) | 523 |
| USP1 | Q29RP1 | Ubiquitin carboxyl-terminal hydrolase 1 (EC 3.4.19.12) (Deubiquitinating enzyme 1) (Ubiquitin thioesterase 1) (Ubiquitin-specific-processing protease 1) [Cleaved into: Ubiquitin carboxyl-terminal hydrolase 1, N-terminal fragment] | 783 |
| PGM1 | Q08DP0 | Phosphoglucomutase-1 (PGM 1) (EC 5.4.2.2) (Glucose phosphomutase 1) | 562 |
| DNAJC6 | Q27974 | Auxilin (EC 3.1.3.-) (DnaJ homolog subfamily C member 6) | 910 |
| LEPROT | Q3SYT0 | Leptin receptor gene-related protein (Endospanin-1) (OB-R gene-related protein) (OB-RGRP) | 131 |
| IL12RB2 | Q9BEG2 | Interleukin-12 receptor subunit beta-2 (IL-12 receptor subunit beta-2) (IL-12R subunit beta-2) (IL-12R-beta-2) (IL-12RB2) | 861 |
| GADD45A | Q3ZBN6 | Growth arrest and DNA damage-inducible protein GADD45 alpha | 165 |
| RPE65 | Q28175 | Retinoid isomerohydrolase (EC 3.1.1.64) (All-trans-retinyl-palmitate hydrolase) (Lutein isomerase) (Meso-zeaxanthin isomerase) (EC 5.3.3.22) (Retinal pigment epithelium-specific 65 kDa protein) (Retinol isomerase) | 533 |
| LRRC7 | F1MCA7 | Leucine-rich repeat-containing protein 7 (Densin-180) (Densin) | 1536 |
| CTH | Q58DW2 | Cystathionine gamma-lyase (EC 4.4.1.1) (Cysteine-protein sulfhydrase) (Gamma-cystathionase) | 405 |
| PTGER3 | P34979 | Prostaglandin E2 receptor EP3 subtype (PGE receptor EP3 subtype) (PGE2 receptor EP3 subtype) (Prostanoid EP3 receptor) | 417 |
| ACADM | Q3SZB4 | Medium-chain specific acyl-CoA dehydrogenase, mitochondrial (MCAD) (EC 1.3.8.7) | 421 |
| ASB17 | Q32KY8 | Ankyrin repeat and SOCS box protein 17 (ASB-17) | 295 |
| PIGK | Q3MHZ7 | GPI-anchor transamidase (EC 2.6.1.-) (GPI-anchor transamidase component PIGK) (Phosphatidylinositol-glycan biosynthesis class K protein) (PIG-K) | 395 |
| USP33 | A6QNM7 | Ubiquitin carboxyl-terminal hydrolase 33 (EC 3.4.19.12) (Deubiquitinating enzyme 33) (Ubiquitin thioesterase 33) (Ubiquitin-specific-processing protease 33) | 912 |
| DNAJB4 | Q2KIT4 | DnaJ homolog subfamily B member 4 | 337 |
| UOX | Q3MHG7 | Uricase (EC 1.7.3.3) (Urate oxidase) | 304 |
| DDAH1 | P56965 | N(G), N(G)-dimethylarginine dimethylaminohydrolase 1 (DDAH-1) (Dimethylarginine dimethylaminohydrolase 1) (EC 3.5.3.18) (DDAHI) (Dimethylargininase-1) | 285 |
| SH3GLB1 | Q32LM0 | Endophilin-B1 (SH3 domain-containing GRB2-like protein B1) | 365 |
| SELENOF | A8YXY3 | Selenoprotein F | 162 |
| LMO4 | Q3SWZ8 | LIM domain transcription factor LMO4 (LIM domain only protein 4) (LMO-4) | 165 |
| KYAT3 | Q0P5G4 | Kynurenine--oxoglutarate transaminase 3 (EC 2.6.1.7) (Cysteine-S-conjugate beta-lyase 2) (EC 4.4.1.13) (Kynurenine aminotransferase 3) (Kynurenine aminotransferase III) (KATIII) (Kynurenine--glyoxylate transaminase) (EC 2.6.1.63) (Kynurenine--oxoglutarate transaminase III) | 455 |
| RPL5 | Q58DW5 | Large ribosomal subunit protein uL18 (60S ribosomal protein L5) | 297 |
| DNTTIP2 | Q0P5H2 | Deoxynucleotidyltransferase terminal-interacting protein 2 | 766 |
| GCLM | Q2T9Y6 | Glutamate--cysteine ligase regulatory subunit (GCS light chain) (Gamma-ECS regulatory subunit) (Gamma-glutamylcysteine synthetase regulatory subunit) (Glutamate--cysteine ligase modifier subunit) | 274 |
| ABCA4 | F1MWM0 | Retinal-specific phospholipid-transporting ATPase ABCA4 (EC 7.6.2.1) (ATP-binding cassette sub-family A member 4) (RIM ABC transporter) (RIM protein) (RmP) (Retinal-specific ATP-binding cassette transporter) | 2281 |
| ARHGAP29 | A7YY57 | Rho GTPase-activating protein 29 (Rho-type GTPase-activating protein 29) | 1269 |
| F3 | P30931 | Tissue factor (TF) (Coagulation factor III) (CD antigen CD142) | 292 |
