# Supplementary material for: Exploring the toxicological mechanisms of reduced fertility in dairy cows due to nonesterified fatty acids on the basis of network toxicology, transcriptomics and molecular docking
Source: Research Square preprint supplement (doi:10.21203/rs.3.rs-7524568/v1), 2025-10-08
Supplement: Supplementary file 5 [file bb7a2b552b7b43de74cb16d9.docx]

Table S2 The information of the 816 target genes of CRF.

| CRF target genes | UniProt ID | Protein names | Length |
| --- | --- | --- | --- |
| IGF1R | Q05688 | Insulin-like growth factor 1 receptor (EC 2.7.10.1) (Insulin-like growth factor I receptor) (IGF-I receptor) (CD antigen CD221) [Cleaved into: Insulin-like growth factor 1 receptor alpha chain; Insulin-like growth factor 1 receptor beta chain] | 640 |
| ESR1 | P49884 | Estrogen receptor (ER) (ER-alpha) (Estradiol receptor) (Nuclear receptor subfamily 3 group A member 1) | 596 |
| CTNNB1 | Q0VCX4 | Catenin beta-1 (Beta-catenin) | 781 |
| STAT3 | P61635 | Signal transducer and activator of transcription 3 | 770 |
| MET | Q769I5 | Hepatocyte growth factor receptor (HGF receptor) (EC 2.7.10.1) (HGF/SF receptor) (Proto-oncogene c-Met) (Scatter factor receptor) (SF receptor) (Tyrosine-protein kinase Met) | 1384 |
| CDK4 | Q32KY4 | Cyclin-dependent kinase 4 (EC 2.7.11.22) (Cell division protein kinase 4) | 303 |
| RAF1 | A7E3S4 | RAF proto-oncogene serine/threonine-protein kinase (EC 2.7.11.1) (Proto-oncogene c-RAF) (cRaf) (Raf-1) | 648 |
| TGFBR1 | O46680 | TGF-beta receptor type-1 (TGFR-1) (EC 2.7.11.30) (TGF-beta type I receptor) (Transforming growth factor-beta receptor type I) (TGF-beta receptor type I) (TbetaR-I) | 499 |
| IKBKB | Q95KV0 | Inhibitor of nuclear factor kappa-B kinase subunit beta (I-kappa-B-kinase beta) (IKK-B) (IKK-beta) (IkBKB) (EC 2.7.11.10) (I-kappa-B kinase 2) (IKK2) (Nuclear factor NF-kappa-B inhibitor kinase beta) (NFKBIKB) (Serine/threonine protein kinase IKBKB) (EC 2.7.11.1) | 756 |
| ADAM10 | Q10741 | Disintegrin and metalloproteinase domain-containing protein 10 (ADAM 10) (EC 3.4.24.81) (Kuzbanian protein homolog) (Mammalian disintegrin-metalloprotease) (Myelin-associated metalloproteinase) (CD antigen CD156c) | 748 |
| TP53 | P67939 | Cellular tumor antigen p53 (Tumor suppressor p53) | 386 |
| SLC2A1 | P27674 | Solute carrier family 2, facilitated glucose transporter member 1 (Glucose transporter type 1, erythrocyte/brain) (GLUT-1) | 492 |
| AKT1 | Q01314 | RAC-alpha serine/threonine-protein kinase (EC 2.7.11.1) (Protein kinase B) (PKB) (Protein kinase B alpha) (PKB alpha) (RAC-PK-alpha) | 480 |
| CFTR | P35071 | Cystic fibrosis transmembrane conductance regulator (CFTR) (ATP-binding cassette sub-family C member 7) (Channel conductance-controlling ATPase) (EC 5.6.1.6) (cAMP-dependent chloride channel) | 1481 |
| KIT | P43481 | Mast/stem cell growth factor receptor Kit (SCFR) (EC 2.7.10.1) (Proto-oncogene c-Kit) (Tyrosine-protein kinase Kit) (CD antigen CD117) | 977 |
| SOD1 | P00442 | Superoxide dismutase [Cu-Zn] (EC 1.15.1.1) | 152 |
| MMP9 | P52176 | Matrix metalloproteinase-9 (MMP-9) (EC 3.4.24.35) (92 kDa gelatinase) (92 kDa type IV collagenase) (Gelatinase B) (GELB) | 712 |
| MMP2 | Q9GLE5 | 72 kDa type IV collagenase (EC 3.4.24.24) (72 kDa gelatinase) (Matrix metalloproteinase-2) (MMP-2) [Cleaved into: PEX] | 661 |
| DNMT1 | Q24K09 | DNA (cytosine-5)-methyltransferase 1 (Dnmt1) (EC 2.1.1.37) | 1611 |
| PSEN1 | Q9XT97 | Presenilin-1 (PS-1) (EC 3.4.23.-) [Cleaved into: Presenilin-1 NTF subunit; Presenilin-1 CTF subunit; Presenilin-1 CTF12 (PS1-CTF12)] | 478 |
| CDK5 | Q02399 | Cyclin-dependent kinase 5 (EC 2.7.11.1) (Cell division protein kinase 5) (Cyclin-dependent-like kinase 5) (Proline-directed protein kinase 33 kDa subunit) (PDPK) (Serine/threonine-protein kinase PSSALRE) (Tau protein kinase II catalytic subunit) (TPKII catalytic subunit) | 292 |
| TNF | Q06599 | Tumor necrosis factor (Cachectin) (TNF-alpha) (Tumor necrosis factor ligand superfamily member 2) (TNF-a) [Cleaved into: Tumor necrosis factor, membrane form (N-terminal fragment) (NTF); Intracellular domain 1 (ICD1); Intracellular domain 2 (ICD2); C-domain 1; C-domain 2; Tumor necrosis factor, soluble form] | 234 |
| PIK3CA | P32871 | Phosphatidylinositol 4,5-bisphosphate 3-kinase catalytic subunit alpha isoform (PI3-kinase subunit alpha) (PI3K-alpha) (PI3Kalpha) (PtdIns-3-kinase subunit alpha) (EC 2.7.1.137) (EC 2.7.1.153) (Phosphatidylinositol 4,5-bisphosphate 3-kinase 110 kDa catalytic subunit alpha) (PtdIns-3-kinase subunit p110-alpha) (p110alpha) (Phosphoinositide-3-kinase catalytic alpha polypeptide) (Serine/threonine protein kinase PIK3CA) (EC 2.7.11.1) | 1068 |
| TGFB1 | P18341 | Transforming growth factor beta-1 proprotein [Cleaved into: Latency-associated peptide (LAP); Transforming growth factor beta-1 (TGF-beta-1)] | 390 |
| CCND1 | Q2KI22 | G1/S-specific cyclin-D1 | 295 |
| PPARG | O18971 | Peroxisome proliferator-activated receptor gamma (PPAR-gamma) (Nuclear receptor subfamily 1 group C member 3) | 505 |
| SMAD4 | Q1HE26 | Mothers against decapentaplegic homolog 4 (MAD homolog 4) (Mothers against DPP homolog 4) (SMAD family member 4) (SMAD 4) (Smad4) | 553 |
| PIK3R1 | P23727 | Phosphatidylinositol 3-kinase regulatory subunit alpha (PI3-kinase regulatory subunit alpha) (PI3K regulatory subunit alpha) (PtdIns-3-kinase regulatory subunit alpha) (Phosphatidylinositol 3-kinase 85 kDa regulatory subunit alpha) (PI3-kinase subunit p85-alpha) (PtdIns-3-kinase regulatory subunit p85-alpha) | 724 |
| MYC | Q2HJ27 | Myc proto-oncogene protein (Proto-oncogene c-Myc) (Transcription factor p64) | 439 |
| MAPK1 | P46196 | Mitogen-activated protein kinase 1 (MAP kinase 1) (MAPK 1) (EC 2.7.11.24) (ERT1) (Extracellular signal-regulated kinase 2) (ERK-2) (Mitogen-activated protein kinase 2) (MAP kinase 2) (MAPK 2) | 360 |
| CXCR4 | P25930 | C-X-C chemokine receptor type 4 (CXC-R4) (CXCR-4) (Fusin) (LCR1) (Leukocyte-derived seven transmembrane domain receptor) (LESTR) (Stromal cell-derived factor 1 receptor) (SDF-1 receptor) (CD antigen CD184) | 353 |
| RAD51 | Q2KJ94 | DNA repair protein RAD51 homolog 1 | 339 |
| IDH1 | Q9XSG3 | Isocitrate dehydrogenase [NADP] cytoplasmic (IDH) (IDH1) (EC 1.1.1.42) (Cytosolic NADP-isocitrate dehydrogenase) (IDPc) (NADP(+)-specific ICDH) (Oxalosuccinate decarboxylase) | 414 |
| SNCA | Q3T0G8 | Alpha-synuclein | 140 |
| HMOX1 | Q5E9F2 | Heme oxygenase 1 (HO-1) (EC 1.14.14.18) [Cleaved into: Heme oxygenase 1 soluble form] | 289 |
| AGTR1 | P25104 | Type-1 angiotensin II receptor (Angiotensin II type-1 receptor) (AT1 receptor) | 359 |
| CTSD | P80209 | Cathepsin D (EC 3.4.23.5) | 390 |
| TLR2 | Q95LA9 | Toll-like receptor 2 (CD antigen CD282) | 784 |
| PROC | P00745 | Vitamin K-dependent protein C (EC 3.4.21.69) (Anticoagulant protein C) (Autoprothrombin IIA) (Blood coagulation factor XIV) [Cleaved into: Vitamin K-dependent protein C light chain; Vitamin K-dependent protein C heavy chain; Activation peptide] | 456 |
| HSPB1 | Q3T149 | Heat shock protein beta-1 (HspB1) (Heat shock 27 kDa protein) (HSP 27) | 201 |
| IDH2 | Q04467 | Isocitrate dehydrogenase [NADP], mitochondrial (IDH) (EC 1.1.1.42) (ICD-M) (IDP) (NADP(+)-specific ICDH) (Oxalosuccinate decarboxylase) | 452 |
| PRKACA | P00517 | cAMP-dependent protein kinase catalytic subunit alpha (PKA C-alpha) (EC 2.7.11.11) | 351 |
| SMAD2 | Q1W668 | Mothers against decapentaplegic homolog 2 (MAD homolog 2) (Mothers against DPP homolog 2) (SMAD family member 2) (SMAD 2) (Smad2) | 467 |
| HGF | Q76BS1 | Hepatocyte growth factor (Hepatopoietin-A) (Scatter factor) (SF) [Cleaved into: Hepatocyte growth factor alpha chain; Hepatocyte growth factor beta chain] | 730 |
| AURKA | Q2TA06 | Aurora kinase A (EC 2.7.11.1) (Aurora 2) (Aurora/IPL1-related kinase 1) (ARK-1) (Aurora-related kinase 1) (Ipl1- and aurora-related kinase 1) (Serine/threonine-protein kinase 15) (Serine/threonine-protein kinase 6) (Serine/threonine-protein kinase Ayk1) (Serine/threonine-protein kinase aurora-A) | 402 |
| UCHL1 | P23356 | Ubiquitin carboxyl-terminal hydrolase isozyme L1 (UCH-L1) (EC 3.4.19.12) (Neuron cytoplasmic protein 9.5) (PGP 9.5) (PGP9.5) (Ubiquitin thioesterase L1) | 252 |
| MYLK | Q28824 | Myosin light chain kinase, smooth muscle (MLCK) (smMLCK) (EC 2.7.11.18) (Telokin) [Cleaved into: Myosin light chain kinase, smooth muscle, deglutamylated form] | 1176 |
| NT5E | Q05927 | 5'-nucleotidase (5'-NT) (EC 3.1.3.35) (EC 3.1.3.5) (EC 3.1.3.89) (EC 3.1.3.91) (EC 3.1.3.99) (5'-deoxynucleotidase) (Ecto-5'-nucleotidase) (IMP-specific 5'-nucleotidase) (Thymidylate 5'-phosphatase) (CD antigen CD73) | 574 |
| AURKB | Q7YRC6 | Aurora kinase B (EC 2.7.11.1) (Aurora 1) (Aurora- and IPL1-like midbody-associated protein 1) (AIM-1) (Aurora/IPL1-related kinase 2) (ARK-2) (Aurora-related kinase 2) (STK-1) (Serine/threonine-protein kinase 12) (Serine/threonine-protein kinase 5) (Serine/threonine-protein kinase aurora-B) | 344 |
| TERT | Q27ID4 | Telomerase reverse transcriptase (EC 2.7.7.49) (Telomerase catalytic subunit) | 1125 |
| IL6 | P26892 | Interleukin-6 (IL-6) | 208 |
| ACE | P12820 | Angiotensin-converting enzyme (ACE) (EC 3.4.15.1) (Dipeptidyl carboxypeptidase I) (Kininase II) (CD antigen CD143) [Cleaved into: Angiotensin-converting enzyme, soluble form] | 1306 |
| COMT | A7MBI7 | Catechol O-methyltransferase (EC 2.1.1.6) | 272 |
| BCL2 | O02718 | Apoptosis regulator Bcl-2 | 229 |
| FAS | P51867 | Tumor necrosis factor receptor superfamily member 6 (Apo-1 antigen) (Apoptosis-mediating surface antigen FAS) (FASLG receptor) (CD antigen CD95) | 323 |
| LDLR | P01131 | Low-density lipoprotein receptor (LDL receptor) | 845 |
| TLR4 | Q9GL65 | Toll-like receptor 4 (CD antigen CD284) | 841 |
| SMARCA4 | A7Z019 | SWI/SNF-related matrix-associated actin-dependent regulator of chromatin subfamily A member 4 (SMARCA4) (EC 3.6.4.-) (BRG1-associated factor 190A) (BAF190A) (Protein brahma homolog 1) (SNF2-beta) (Transcription activator BRG1) | 1606 |
| CAT | P00432 | Catalase (EC 1.11.1.6) | 527 |
| PRKAR1A | P00514 | cAMP-dependent protein kinase type I-alpha regulatory subunit [Cleaved into: cAMP-dependent protein kinase type I-alpha regulatory subunit, N-terminally processed] | 380 |
| FOS | O77628 | Protein c-Fos (Cellular oncogene fos) (Transcription factor AP-1 subunit c-Fos) | 380 |
| TF | Q29443 | Serotransferrin (Transferrin) (Beta-1 metal-binding globulin) (Siderophilin) | 704 |
| GJA1 | P18246 | Gap junction alpha-1 protein (Connexin-43) (Cx43) (Vascular smooth muscle connexin-43) | 383 |
| TGFB2 | P21214 | Transforming growth factor beta-2 proprotein (Milk growth factor) (MGF) [Cleaved into: Latency-associated peptide (LAP); Transforming growth factor beta-2 (TGF-beta-2)] | 414 |
| ADA | P56658 | Adenosine deaminase (EC 3.5.4.4) (Adenosine aminohydrolase) | 363 |
| BAX | O02703 | Apoptosis regulator BAX | 192 |
| GAPDH | P10096 | Glyceraldehyde-3-phosphate dehydrogenase (GAPDH) (EC 1.2.1.12) (Peptidyl-cysteine S-nitrosylase GAPDH) (EC 2.6.99.-) | 333 |
| VIM | P48616 | Vimentin | 466 |
| PLAU | Q05589 | Urokinase-type plasminogen activator (U-plasminogen activator) (uPA) (EC 3.4.21.73) [Cleaved into: Urokinase-type plasminogen activator long chain A; Urokinase-type plasminogen activator short chain A; Urokinase-type plasminogen activator chain B] | 433 |
| GAA | Q9MYM4 | Lysosomal alpha-glucosidase (EC 3.2.1.20) (Acid maltase) | 937 |
| NGF | P13600 | Beta-nerve growth factor (Beta-NGF) | 241 |
| NFE2L2 | Q5NUA6 | Nuclear factor erythroid 2-related factor 2 (NF-E2-related factor 2) (NFE2-related factor 2) (Nuclear factor, erythroid derived 2, like 2) | 607 |
| PARP1 | P18493 | Poly [ADP-ribose] polymerase 1 (PARP-1) (EC 2.4.2.30) (ADP-ribosyltransferase diphtheria toxin-like 1) (ARTD1) (DNA ADP-ribosyltransferase PARP1) (EC 2.4.2.-) (NAD(+) ADP-ribosyltransferase 1) (ADPRT 1) (Poly[ADP-ribose] synthase 1) (Protein poly-ADP-ribosyltransferase PARP1) (EC 2.4.2.-) [Cleaved into: Poly [ADP-ribose] polymerase 1, processed C-terminus (Poly [ADP-ribose] polymerase 1, 89-kDa form); Poly [ADP-ribose] polymerase 1, processed N-terminus (Poly [ADP-ribose] polymerase 1, 24-kDa form)] | 1016 |
| DBH | P15101 | Dopamine beta-hydroxylase (EC 1.14.17.1) (Dopamine beta-monooxygenase) [Cleaved into: Soluble dopamine beta-hydroxylase] | 610 |
| FOXO1 | E1BPQ1 | Forkhead box protein O1 (Forkhead box protein O1A) (Forkhead in rhabdomyosarcoma) | 624 |
| CDK2 | Q5E9Y0 | Cyclin-dependent kinase 2 (EC 2.7.11.22) (Cell division protein kinase 2) | 298 |
| DPYD | Q28007 | Dihydropyrimidine dehydrogenase [NADP(+)] (DHPDHase) (DPD) (EC 1.3.1.2) (Dihydrothymine dehydrogenase) (Dihydrouracil dehydrogenase) | 1025 |
| HSP90AA1 | Q76LV2 | Heat shock protein HSP 90-alpha (EC 3.6.4.10) | 733 |
| MMP14 | Q9GLE4 | Matrix metalloproteinase-14 (MMP-14) (EC 3.4.24.80) (Membrane-type matrix metalloproteinase 1) (MT-MMP 1) (MTMMP1) (Membrane-type-1 matrix metalloproteinase) (MT1-MMP) (MT1MMP) | 582 |
| CASR | P35384 | Extracellular calcium-sensing receptor (CaSR) (Parathyroid cell calcium-sensing receptor) (BoPCaR1) (PCaR1) | 1085 |
| CALR | P52193 | Calreticulin (CRP55) (Calregulin) (HACBP) | 417 |
| ALDH2 | P20000 | Aldehyde dehydrogenase, mitochondrial (EC 1.2.1.3) (ALDH class 2) (ALDH-E2) (ALDHI) | 520 |
| CDH2 | P19534 | Cadherin-2 (Neural cadherin) (N-cadherin) (CD antigen CD325) | 906 |
| CTSB | P07688 | Cathepsin B (EC 3.4.22.1) (BCSB) [Cleaved into: Cathepsin B light chain; Cathepsin B heavy chain] | 335 |
| TEK | Q06807 | Angiopoietin-1 receptor (EC 2.7.10.1) (Endothelial tyrosine kinase) (Tyrosine kinase with Ig and EGF homology domains-2) (Tyrosine-protein kinase receptor TIE-2) (CD antigen CD202b) | 1125 |
| GLUD1 | P00366 | Glutamate dehydrogenase 1, mitochondrial (GDH 1) (EC 1.4.1.3) | 558 |
| PLK1 | Q2TA25 | Serine/threonine-protein kinase PLK1 (EC 2.7.11.21) (Polo-like kinase 1) (PLK-1) | 602 |
| PRKCA | P04409 | Protein kinase C alpha type (PKC-A) (PKC-alpha) (EC 2.7.11.13) | 672 |
| ACVR1 | Q28041 | Activin receptor type-1 (EC 2.7.11.30) (Activin receptor type I) (ACTR-I) (Serine/threonine-protein kinase receptor R1) (SKR1) | 509 |
| LDHA | P19858 | L-lactate dehydrogenase A chain (LDH-A) (EC 1.1.1.27) (LDH muscle subunit) (LDH-M) | 332 |
| CA2 | P00921 | Carbonic anhydrase 2 (EC 4.2.1.1) (Carbonate dehydratase II) (Carbonic anhydrase II) (CA-II) (Cyanamide hydratase CA2) (EC 4.2.1.69) | 260 |
| TLR3 | Q5TJ59 | Toll-like receptor 3 (CD antigen CD283) | 904 |
| PAK1 | Q08E52 | Serine/threonine-protein kinase PAK 1 (EC 2.7.11.1) (Alpha-PAK) (p21-activated kinase 1) (PAK-1) (p65-PAK) | 544 |
| PRKCG | P05128 | Protein kinase C gamma type (PKC-gamma) (EC 2.7.11.13) | 682 |
| PPP3CA | P48452 | Protein phosphatase 3 catalytic subunit alpha (EC 3.1.3.16) (CAM-PRP catalytic subunit) (Calcineurin A alpha) (Calmodulin-dependent calcineurin A subunit alpha isoform) (CNA alpha) (Serine/threonine-protein phosphatase 2B catalytic subunit alpha isoform) | 521 |
| BRCA1 | Q864U1 | Breast cancer type 1 susceptibility protein homolog (EC 2.3.2.27) (RING-type E3 ubiquitin transferase BRCA1) | 1849 |
| SERPINE1 | P13909 | Plasminogen activator inhibitor 1 (PAI) (PAI-1) (Endothelial plasminogen activator inhibitor) (Serpin E1) | 402 |
| GNAS | O18979 | Neuroendocrine secretory protein 55 (NESP55) [Cleaved into: LSAL tetrapeptide; GAIPIRRH peptide] | 241 |
| GNAS | P04896 | Guanine nucleotide-binding protein G(s) subunit alpha isoforms short (EC 3.6.5.-) (Adenylate cyclase-stimulating G alpha protein) | 394 |
| IFNG | P07353 | Interferon gamma (BoIFNG) (IFN-gamma) | 166 |
| F2 | P00735 | Prothrombin (EC 3.4.21.5) (Coagulation factor II) [Cleaved into: Activation peptide fragment 1; Activation peptide fragment 2; Thrombin light chain; Thrombin heavy chain] | 625 |
| APOA1 | P15497 | Apolipoprotein A-I (Apo-AI) (ApoA-I) (Apolipoprotein A1) [Cleaved into: Proapolipoprotein A-I (ProapoA-I); Truncated apolipoprotein A-I] | 265 |
| APP | Q28053 | Amyloid-beta precursor protein (ABPP) (APP) (Alzheimer disease amyloid A4 protein homolog) (Amyloid precursor protein) (Amyloid-beta (A4) precursor protein) (Amyloid-beta A4 protein) [Cleaved into: Soluble APP-beta (S-APP-beta); CTF-alpha; Amyloid-beta protein 42 (Abeta42) (Beta-APP42); Amyloid-beta protein 40 (Abeta40) (Beta-APP40); Gamma-secretase C-terminal fragment 59 (Gamma-CTF(59)); Gamma-secretase C-terminal fragment 57 (Gamma-CTF(57))] | 59 |
| NPM1 | Q3T160 | Nucleophosmin (NPM) | 294 |
| ACTB | P60712 | Actin, cytoplasmic 1 (EC 3.6.4.-) (Beta-actin) [Cleaved into: Actin, cytoplasmic 1, N-terminally processed] | 375 |
| PCNA | Q3ZBW4 | Proliferating cell nuclear antigen (PCNA) | 261 |
| DNM2 | A6H7I5 | Dynamin-2 (EC 3.6.5.5) | 866 |
| LPL | P11151 | Lipoprotein lipase (LPL) (EC 3.1.1.34) (Phospholipase A1) (EC 3.1.1.32) | 478 |
| GATA3 | Q08DV0 | Trans-acting T-cell-specific transcription factor GATA-3 (GATA-binding factor 3) | 443 |
| IL2RA | P12342 | Interleukin-2 receptor subunit alpha (IL-2 receptor subunit alpha) (IL-2-RA) (IL-2R subunit alpha) (IL2-RA) (TAC antigen) (p55) (CD antigen CD25) | 275 |
| ICAM1 | Q95132 | Intercellular adhesion molecule 1 (ICAM-1) (CD antigen CD54) | 535 |
| TH | P17289 | Tyrosine 3-monooxygenase (EC 1.14.16.2) (Tyrosine 3-hydroxylase) (TH) | 491 |
| CD36 | P26201 | Platelet glycoprotein 4 (Glycoprotein IIIb) (GPIIIB) (PAS IV) (PAS-4) (Platelet glycoprotein IV) (GPIV) (CD antigen CD36) | 472 |
| SLC6A3 | P27922 | Sodium-dependent dopamine transporter (DA transporter) (DAT) (Solute carrier family 6 member 3) | 693 |
| TUBB3 | Q2T9S0 | Tubulin beta-3 chain | 450 |
| CDC42 | Q2KJ93 | Cell division control protein 42 homolog (EC 3.6.5.2) | 191 |
| CD40 | Q28203 | Tumor necrosis factor receptor superfamily member 5 (B-cell surface antigen CD40) (CD40L receptor) (CD antigen CD40) | 280 |
| ALPL | P09487 | Alkaline phosphatase, tissue-nonspecific isozyme (AP-TNAP) (TNAP) (TNSALP) (EC 3.1.3.1) (Alkaline phosphatase liver/bone/kidney isozyme) (Phosphoamidase) (Phosphocreatine phosphatase) (EC 3.9.1.1) | 524 |
| FN1 | P07589 | Fibronectin (FN) [Cleaved into: Anastellin] | 2478 |
| HDAC1 | Q32PJ8 | Histone deacetylase 1 (HD1) (EC 3.5.1.98) (Protein deacetylase HDAC1) (EC 3.5.1.-) (Protein deacylase HDAC1) (EC 3.5.1.-) | 482 |
| ITGB2 | P32592 | Integrin beta-2 (Cell surface adhesion glycoproteins LFA-1/CR3/p150,95 subunit beta) (Complement receptor C3 subunit beta) (CD antigen CD18) | 769 |
| EDNRB | P28088 | Endothelin receptor type B (ET-B) (ET-BR) (Endothelin receptor non-selective type) | 441 |
| HK1 | P27595 | Hexokinase-1 (EC 2.7.1.1) (Brain form hexokinase) (Hexokinase type I) (HK I) | 918 |
| DDC | P27718 | Aromatic-L-amino-acid decarboxylase (AADC) (EC 4.1.1.28) (DOPA decarboxylase) (DDC) | 487 |
| CHUK | Q95KV1 | Inhibitor of nuclear factor kappa-B kinase subunit alpha (I-kappa-B kinase alpha) (IKK-A) (IKK-alpha) (IkBKA) (EC 2.7.11.10) (I-kappa-B kinase 1) (IKK1) (Nuclear factor NF-kappa-B inhibitor kinase alpha) (NFKBIKA) | 740 |
| PRKG1 | P00516 | cGMP-dependent protein kinase 1 (cGK 1) (cGK1) (EC 2.7.11.12) (cGMP-dependent protein kinase I) (cGKI) | 671 |
| EIF2AK3 | A5D791 | Eukaryotic translation initiation factor 2-alpha kinase 3 (EC 2.7.11.1) (PRKR-like endoplasmic reticulum kinase) (Protein tyrosine kinase EIF2AK3) (EC 2.7.10.2) | 1115 |
| FTH1 | O46414 | Ferritin heavy chain (Ferritin H subunit) (EC 1.16.3.1) [Cleaved into: Ferritin heavy chain, N-terminally processed] | 181 |
| PLA2G7 | Q28017 | Platelet-activating factor acetylhydrolase (PAF acetylhydrolase) (EC 3.1.1.47) (1-alkyl-2-acetylglycerophosphocholine esterase) (2-acetyl-1-alkylglycerophosphocholine esterase) (LDL-associated phospholipase A2) (LDL-PLA(2)) (PAF 2-acylhydrolase) | 444 |
| RAC2 | Q9TU25 | Ras-related C3 botulinum toxin substrate 2 (EC 3.6.5.2) (p21-Rac2) | 192 |
| RPS6KB1 | Q6TJY3 | Ribosomal protein S6 kinase beta-1 (S6K-beta-1) (S6K1) (EC 2.7.11.1) (70 kDa ribosomal protein S6 kinase 1) (P70S6K1) (p70-S6K 1) | 527 |
| SLC9A1 | Q28036 | Sodium/hydrogen exchanger 1 (Na(+)/H(+) exchanger 1) (NHE-1) (Solute carrier family 9 member 1) | 818 |
| PSEN2 | Q9XT96 | Presenilin-2 (PS-2) (EC 3.4.23.-) [Cleaved into: Presenilin-2 NTF subunit; Presenilin-2 CTF subunit] | 449 |
| SLC2A2 | P58351 | Solute carrier family 2, facilitated glucose transporter member 2 (Glucose transporter type 2, liver) (GLUT-2) | 510 |
| CSNK2A1 | P68399 | Casein kinase II subunit alpha (CK II alpha) (EC 2.7.11.1) | 391 |
| ACAT1 | Q29RZ0 | Acetyl-CoA acetyltransferase, mitochondrial (EC 2.3.1.9) (Acetoacetyl-CoA thiolase) | 422 |
| RHEB | Q56JV3 | GTP-binding protein Rheb (EC 3.6.5.-) (Ras homolog enriched in brain) | 184 |
| CXCR2 | Q28003 | C-X-C chemokine receptor type 2 (CXC-R2) (CXCR-2) (High affinity interleukin-8 receptor B) (IL-8R B) (CD antigen CD182) | 360 |
| TBXA2R | Q95125 | Thromboxane A2 receptor (TXA2-R) (Prostanoid TP receptor) | 343 |
| DNM1 | Q08DF4 | Dynamin-1 (EC 3.6.5.5) (Dynamin) | 856 |
| PPP2CA | P67774 | Serine/threonine-protein phosphatase 2A catalytic subunit alpha isoform (PP2A-alpha) (EC 3.1.3.16) | 309 |
| NR5A1 | Q04752 | Steroidogenic factor 1 (SF-1) (STF-1) (Adrenal 4-binding protein) (Fushi tarazu factor homolog 1) (Nuclear receptor subfamily 5 group A member 1) (Steroid hormone receptor Ad4BP) | 461 |
| CYP17A1 | P05185 | Steroid 17-alpha-hydroxylase/17,20 lyase (EC 1.14.14.19) (17-alpha-hydroxyprogesterone aldolase) (EC 1.14.14.32) (CYPXVII) (Cytochrome P450 17A1) (Cytochrome P450-C17) (Cytochrome P450c17) (Steroid 17-alpha-monooxygenase) | 509 |
| CYP11A1 | P00189 | Cholesterol side-chain cleavage enzyme, mitochondrial (EC 1.14.15.6) (CYPXIA1) (Cholesterol desmolase) (Cytochrome P450 11A1) (Cytochrome P450(scc)) | 520 |
| CDH1 | Q6R8F2 | Cadherin-1 (Epithelial cadherin) (E-cadherin) (CD antigen CD324) [Cleaved into: E-Cad/CTF1; E-Cad/CTF2; E-Cad/CTF3] | 882 |
| APOE | Q03247 | Apolipoprotein E (Apo-E) | 316 |
| BDNF | Q95106 | Neurotrophic factor BDNF precursor form (proBDNF) (Brain-derived neurotrophic factor) [Cleaved into: Neurotrophic factor BDNF] | 250 |
| LEPR | Q3SYT0 | Leptin receptor gene-related protein (Endospanin-1) (OB-R gene-related protein) (OB-RGRP) | 131 |
| NOS3 | P29473 | Nitric oxide synthase 3 (EC 1.14.13.39) (Constitutive NOS) (cNOS) (EC-NOS) (NOS type III) (NOSIII) (Nitric oxide synthase, endothelial) (Endothelial NOS) (eNOS) | 1205 |
| BMP4 | Q2KJH1 | Bone morphogenetic protein 4 (BMP-4) | 409 |
| PTGS2 | O62698 | Prostaglandin G/H synthase 2 (EC 1.14.99.1) (Cyclooxygenase-2) (COX-2) (PHS II) (Prostaglandin H2 synthase 2) (PGH synthase 2) (PGHS-2) (Prostaglandin-endoperoxide synthase 2) | 604 |
| COL1A1 | P02453 | Collagen alpha-1(I) chain (Alpha-1 type I collagen) | 1463 |
| CCL2 | P28291 | C-C motif chemokine 2 (Acidic seminal fluid protein) (Monocyte chemotactic protein 1A) (MCP-1) (MCP-1A) (Small-inducible cytokine A2) | 99 |
| MAOA | P21398 | Amine oxidase [flavin-containing] A (EC 1.4.3.21) (EC 1.4.3.4) (Monoamine oxidase type A) (MAO-A) | 527 |
| CD40LG | P51749 | CD40 ligand (CD40-L) (Tumor necrosis factor ligand superfamily member 5) (CD antigen CD154) [Cleaved into: CD40 ligand, membrane form; CD40 ligand, soluble form (sCD40L)] | 261 |
| SERPINA1 | P34955 | Alpha-1-antiproteinase (Alpha-1-antitrypsin) (Alpha-1-proteinase inhibitor) (Serpin A1) | 416 |
| MAPT | P29172 | Microtubule-associated protein tau (Neurofibrillary tangle protein) (Paired helical filament-tau) (PHF-tau) | 448 |
| NOS2 | Q27995 | Nitric oxide synthase, inducible (EC 1.14.13.39) (Inducible NO synthase) (Inducible NOS) (iNOS) (NOS type II) (NOSII) (Peptidyl-cysteine S-nitrosylase NOS2) | 1156 |
| PLG | P06868 | Plasminogen (EC 3.4.21.7) [Cleaved into: Plasmin heavy chain A; Activation peptide; Plasmin heavy chain A, short form; Plasmin light chain B] | 812 |
| GSTP1 | P28801 | Glutathione S-transferase P (EC 2.5.1.18) (GST class-pi) | 210 |
| DRD2 | P20288 | D(2) dopamine receptor (Dopamine D2 receptor) | 444 |
| GBA1 | Q2KHZ8 | Lysosomal acid glucosylceramidase (EC 3.2.1.45) (Acid beta-glucosidase) (Beta-glucocerebrosidase) (Cholesterol glucosyltransferase) (SGTase) (EC 2.4.1.-) (Cholesteryl-beta-glucosidase) (EC 3.2.1.-) (D-glucosyl-N-acylsphingosine glucohydrolase) (Lysosomal cholesterol glycosyltransferase) (Lysosomal galactosylceramidase) (EC 3.2.1.46) (Lysosomal glycosylceramidase) | 536 |
| TYMS | Q2TA32 | Thymidylate synthase (TS) (TSase) (EC 2.1.1.45) | 354 |
| SERPINC1 | P41361 | Antithrombin-III (ATIII) (Serpin C1) | 465 |
| AGT | P01017 | Angiotensinogen (Serpin A8) [Cleaved into: Angiotensin-1 (Angiotensin 1-10) (Angiotensin I) (Ang I); Angiotensin-2 (Angiotensin 1-8) (Angiotensin II) (Ang II); Angiotensin-3 (Angiotensin 2-8) (Angiotensin III) (Ang III) (Des-Asp[1]-angiotensin II); Angiotensin-4 (Angiotensin 3-8) (Angiotensin IV) (Ang IV); Angiotensin 1-9; Angiotensin 1-7; Angiotensin 1-5; Angiotensin 1-4] | 476 |
| COL2A1 | P02459 | Collagen alpha-1(II) chain (Alpha-1 type II collagen) | 1487 |
| IL1RN | O77482 | Interleukin-1 receptor antagonist protein (IL-1RN) (IL-1ra) (IRAP) (IL1 inhibitor) | 174 |
| CASP3 | Q08DY9 | Caspase-3 (CASP-3) (EC 3.4.22.56) [Cleaved into: Caspase-3 subunit p17; Caspase-3 subunit p12] | 275 |
| MMP1 | P28053 | Interstitial collagenase (EC 3.4.24.7) (Fibroblast collagenase) (Matrix metalloproteinase-1) (MMP-1) | 469 |
| TNFRSF1A | O19131 | Tumor necrosis factor receptor superfamily member 1A (Tumor necrosis factor receptor 1) (TNF-R1) (Tumor necrosis factor receptor type I) (TNF-RI) (TNFR-I) (p55) (p60) (CD antigen CD120a) | 471 |
| GLB1 | Q58D55 | Beta-galactosidase (EC 3.2.1.23) (Acid beta-galactosidase) (Lactase) | 653 |
| PLAT | Q28198 | Tissue-type plasminogen activator (t-PA) (t-plasminogen activator) (tPA) (EC 3.4.21.68) [Cleaved into: Tissue-type plasminogen activator chain A; Tissue-type plasminogen activator chain B] | 566 |
| ACE2 | Q58DD0 | Angiotensin-converting enzyme 2 (EC 3.4.17.23) (ACE-related carboxypeptidase) (EC 3.4.17.-) [Cleaved into: Processed angiotensin-converting enzyme 2] | 804 |
| JUN | O77627 | Transcription factor Jun (Activator protein 1) (AP1) (Proto-oncogene c-Jun) (Transcription factor AP-1 subunit Jun) (V-jun avian sarcoma virus 17 oncogene homolog) | 335 |
| HMGB1 | P10103 | High mobility group protein B1 (High mobility group protein 1) (HMG-1) | 215 |
| NLRP3 | A6QLE5 | NACHT, LRR and PYD domains-containing protein 3 (EC 3.6.4.-) | 1031 |
| STAT5B | Q9TUM3 | Signal transducer and activator of transcription 5B | 787 |
| ADRB2 | Q28044 | Beta-2 adrenergic receptor (Beta-2 adrenoreceptor) (Beta-2 adrenoceptor) | 418 |
| PGK1 | Q3T0P6 | Phosphoglycerate kinase 1 (EC 2.7.11.1) (EC 2.7.2.3) | 417 |
| ITPR1 | Q9TU34 | Inositol 1,4,5-trisphosphate-gated calcium channel ITPR1 (IP3 receptor isoform 1) (IP3R 1) (InsP3R1) (Inositol 1,4,5-trisphosphate receptor type 1) (Type 1 inositol 1,4,5-trisphosphate receptor) (Type 1 InsP3 receptor) | 2709 |
| F10 | P00743 | Coagulation factor X (EC 3.4.21.6) (Stuart factor) [Cleaved into: Factor X light chain; Factor X heavy chain; Activated factor Xa heavy chain] | 492 |
| C3 | Q2UVX4 | Complement C3 [Cleaved into: Complement C3 beta chain; Complement C3 alpha chain; C3a anaphylatoxin; C3-beta-c (C3bc); Acylation stimulating protein (ASP) (C3adesArg); Complement C3b (Complement C3b-alpha' chain); Complement C3c alpha' chain fragment 1; Complement C3dg fragment; Complement C3g fragment; Complement C3d fragment; Complement C3f fragment; Complement C3c alpha' chain fragment 2] | 1661 |
| PHGDH | Q5EAD2 | D-3-phosphoglycerate dehydrogenase (3-PGDH) (EC 1.1.1.95) (2-oxoglutarate reductase) (EC 1.1.1.399) (Malate dehydrogenase) (EC 1.1.1.37) | 533 |
| CREB1 | P27925 | Cyclic AMP-responsive element-binding protein 1 (CREB-1) (cAMP-responsive element-binding protein 1) (Cyclic AMP-responsive DNA-binding protein) | 325 |
| VCP | Q3ZBT1 | Transitional endoplasmic reticulum ATPase (TER ATPase) (EC 3.6.4.6) (15S Mg(2+)-ATPase p97 subunit) (Valosin-containing protein) (VCP) | 806 |
| FGA | P02672 | Fibrinogen alpha chain [Cleaved into: Fibrinopeptide A; Fibrinogen alpha chain] | 615 |
| SCNN1A | P55270 | Epithelial sodium channel subunit alpha (Alpha-ENaC) (Epithelial Na(+) channel subunit alpha) (Alpha-NaCH) (Amiloride-sensitive sodium channel subunit alpha) (Nonvoltage-gated sodium channel 1 subunit alpha) (SCNEA) | 650 |
| RAC1 | P62998 | Ras-related C3 botulinum toxin substrate 1 (EC 3.6.5.2) (p21-Rac1) | 192 |
| ITGB1 | P53712 | Integrin beta-1 (Fibronectin receptor subunit beta) (VLA-4 subunit beta) (CD antigen CD29) | 798 |
| VKORC1 | Q6B4J2 | Vitamin K epoxide reductase complex subunit 1 (EC 1.17.4.4) (Vitamin K1 2,3-epoxide reductase subunit 1) | 163 |
| HSPA8 | P19120 | Heat shock cognate 71 kDa protein (EC 3.6.4.10) (Heat shock 70 kDa protein 8) | 650 |
| GAD1 | Q0VCA1 | Glutamate decarboxylase 1 (EC 4.1.1.15) | 594 |
| CTSK | Q5E968 | Cathepsin K (EC 3.4.22.38) | 329 |
| B2M | P01888 | Beta-2-microglobulin (Lactollin) | 118 |
| RHOA | P61585 | Transforming protein RhoA (EC 3.6.5.2) (Gb) (p21) | 193 |
| MYD88 | Q599T9 | Myeloid differentiation primary response protein MyD88 | 296 |
| CPT2 | Q2KJB7 | Carnitine O-palmitoyltransferase 2, mitochondrial (EC 2.3.1.21) (Carnitine palmitoyltransferase II) (CPT II) | 658 |
| ASS1 | P14568 | Argininosuccinate synthase (EC 6.3.4.5) (Citrulline--aspartate ligase) | 412 |
| EDNRA | P21450 | Endothelin-1 receptor (Endothelin receptor type A) (ET-A) (ET-AR) | 427 |
| STAT5A | Q95115 | Signal transducer and activator of transcription 5A (Mammary gland factor) | 794 |
| MGMT | P29177 | Methylated-DNA--protein-cysteine methyltransferase (EC 2.1.1.63) (6-O-methylguanine-DNA methyltransferase) (MGMT) (O-6-methylguanine-DNA-alkyltransferase) | 9 |
| PSMB8 | Q3T112 | Proteasome subunit beta type-8 (EC 3.4.25.1) (Proteasome subunit beta-5i) | 276 |
| PCSK1 | Q9GLR1 | Neuroendocrine convertase 1 (NEC 1) (EC 3.4.21.93) (Prohormone convertase 1) (Proprotein convertase 1) (PC1) | 753 |
| GSN | Q3SX14 | Gelsolin (Actin-depolymerizing factor) (ADF) (Brevin) | 731 |
| TBP | Q2HJ52 | TATA-box-binding protein (TATA sequence-binding protein) (TATA-binding factor) (TATA-box factor) (Transcription initiation factor TFIID TBP subunit) | 319 |
| P4HB | P05307 | Protein disulfide-isomerase (PDI) (EC 5.3.4.1) (Cellular thyroid hormone-binding protein) (Prolyl 4-hydroxylase subunit beta) (p55) | 510 |
| ABCG2 | Q4GZT4 | Broad substrate specificity ATP-binding cassette transporter ABCG2 (EC 7.6.2.2) (ATP-binding cassette sub-family G member 2) (Urate exporter) (CD antigen CD338) | 655 |
| SPARC | P13213 | SPARC (Basement-membrane protein 40) (BM-40) (Osteonectin) (ON) (Secreted protein acidic and rich in cysteine) | 303 |
| PTH1R | Q1LZF7 | Parathyroid hormone/parathyroid hormone-related peptide receptor (PTH/PTHrP type I receptor) (PTH/PTHr receptor) (Parathyroid hormone 1 receptor) (PTH1 receptor) | 589 |
| EIF4E | Q9N0T5 | Eukaryotic translation initiation factor 4E (eIF-4E) (eIF4E) (mRNA cap-binding protein) | 217 |
| DPP4 | P81425 | Dipeptidyl peptidase 4 (EC 3.4.14.5) (Activation molecule 3) (ACT3) (Adenosine deaminase complexing protein) (ADCP-I) (Dipeptidyl peptidase IV) (DPP IV) (T-cell activation antigen CD26) (WC10) (CD antigen CD26) [Cleaved into: Dipeptidyl peptidase 4 membrane form (Dipeptidyl peptidase IV membrane form); Dipeptidyl peptidase 4 soluble form (Dipeptidyl peptidase IV soluble form)] | 765 |
| MMP13 | O77656 | Collagenase 3 (EC 3.4.24.-) (Matrix metalloproteinase-13) (MMP-13) | 471 |
| DLD | F1N206 | Dihydrolipoyl dehydrogenase, mitochondrial (EC 1.8.1.4) (Dihydrolipoamide dehydrogenase) | 509 |
| PIK3R2 | P23726 | Phosphatidylinositol 3-kinase regulatory subunit beta (PI3-kinase regulatory subunit beta) (PI3K regulatory subunit beta) (PtdIns-3-kinase regulatory subunit beta) (Phosphatidylinositol 3-kinase 85 kDa regulatory subunit beta) (PI3-kinase subunit p85-beta) (PtdIns-3-kinase regulatory subunit p85-beta) | 724 |
| MEF2C | Q2KIA0 | Myocyte-specific enhancer factor 2C | 441 |
| PNP | P55859 | Purine nucleoside phosphorylase (PNP) (EC 2.4.2.1) (Inosine phosphorylase) (Inosine-guanosine phosphorylase) | 289 |
| SNAP25 | Q17QQ3 | Synaptosomal-associated protein 25 (SNAP-25) (Synaptosomal-associated 25 kDa protein) | 206 |
| STIM1 | Q58CP9 | Stromal interaction molecule 1 | 683 |
| ARG1 | Q2KJ64 | Arginase-1 (EC 3.5.3.1) (Liver-type arginase) (Type I arginase) | 322 |
| ASAH1 | Q17QB3 | Acid ceramidase (AC) (ACDase) (Acid CDase) (EC 3.5.1.23) (Acylsphingosine deacylase) (N-acylethanolamine hydrolase ASAH1) (EC 3.5.1.-) (N-acylsphingosine amidohydrolase) [Cleaved into: Acid ceramidase subunit alpha; Acid ceramidase subunit beta] | 395 |
| PRDX1 | Q5E947 | Peroxiredoxin-1 (EC 1.11.1.24) (Thioredoxin-dependent peroxiredoxin 1) | 199 |
| BCHE | P32749 | Cholinesterase (EC 3.1.1.8) (Acylcholine acylhydrolase) (Butyrylcholine esterase) (Choline esterase II) (Pseudocholinesterase) | 602 |
| FBP1 | Q3SZB7 | Fructose-1,6-bisphosphatase 1 (FBPase 1) (EC 3.1.3.11) (D-fructose-1,6-bisphosphate 1-phosphohydrolase 1) (Liver FBPase) | 338 |
| PLCG1 | P08487 | 1-phosphatidylinositol 4,5-bisphosphate phosphodiesterase gamma-1 (EC 3.1.4.11) (PLC-148) (Phosphoinositide phospholipase C-gamma-1) (Phospholipase C-II) (PLC-II) (Phospholipase C-gamma-1) (PLC-gamma-1) | 1291 |
| MAP3K7 | A2VDU3 | Mitogen-activated protein kinase kinase kinase 7 (EC 2.7.11.25) | 579 |
| ACVR2B | Q95126 | Activin receptor type-2B (EC 2.7.11.30) (Activin receptor type IIB) (ACTR-IIB) | 512 |
| ATP1A1 | Q08DA1 | Sodium/potassium-transporting ATPase subunit alpha-1 (Na(+)/K(+) ATPase alpha-1 subunit) (EC 7.2.2.13) (Sodium pump subunit alpha-1) | 1021 |
| ACACA | Q9TTS3 | Acetyl-CoA carboxylase 1 (ACC1) (EC 6.4.1.2) (ACC-alpha) | 2346 |
| CTH | Q58DW2 | Cystathionine gamma-lyase (EC 4.4.1.1) (Cysteine-protein sulfhydrase) (Gamma-cystathionase) | 405 |
| ANPEP | P79098 | Aminopeptidase N (AP-N) (bAPN) (EC 3.4.11.2) (Alanyl aminopeptidase) (Aminopeptidase M) (AP-M) (Microsomal aminopeptidase) (CD antigen CD13) | 965 |
| PIM1 | Q9N0P9 | Serine/threonine-protein kinase pim-1 (EC 2.7.11.1) | 313 |
| YWHAE | P62261 | 14-3-3 protein epsilon (14-3-3E) | 255 |
| ADRB1 | Q9TT96 | Beta-1 adrenergic receptor (Beta-1 adrenoreceptor) (Beta-1 adrenoceptor) | 467 |
| PLA2G4A | A4IFJ5 | Cytosolic phospholipase A2 (cPLA2) (Phospholipase A2 group IVA) [Includes: Phospholipase A2 (EC 3.1.1.4) (Phosphatidylcholine 2-acylhydrolase); Lysophospholipase (EC 3.1.1.5)] | 749 |
| TRPC6 | Q9MYW0 | Short transient receptor potential channel 6 (TrpC6) | 931 |
| RAB7A | Q3T0F5 | Ras-related protein Rab-7a (EC 3.6.5.2) | 207 |
| MYB | P46200 | Transcriptional activator Myb (Proto-oncogene c-Myb) | 640 |
| SGK1 | A7MB74 | Serine/threonine-protein kinase Sgk1 (EC 2.7.11.1) (Serum/glucocorticoid-regulated kinase 1) | 431 |
| PPIB | P80311 | Peptidyl-prolyl cis-trans isomerase B (PPIase B) (EC 5.2.1.8) (Cyclophilin B) (Rotamase B) (S-cyclophilin) (SCYLP) | 216 |
| HSP90AB1 | Q76LV1 | Heat shock protein HSP 90-beta | 724 |
| ENTPD1 | O18956 | Ectonucleoside triphosphate diphosphohydrolase 1 (EC 3.6.1.5) (ATP diphosphohydrolase) (ATP-DPH) (ATPDase) (Ecto-ATP diphosphohydrolase 1) (Ecto-ATPDase 1) (Ecto-ATPase 1) (Ecto-apyrase) (Lymphoid cell activation antigen) (Nucleoside triphosphate diphosphohydrolase 1) (NTPDase1) (CD antigen CD39) | 513 |
| CAPN1 | Q27970 | Calpain-1 catalytic subunit (EC 3.4.22.52) (Calcium-activated neutral proteinase 1) (CANP 1) (Calpain mu-type) (Calpain-1 large subunit) (Micromolar-calpain) (muCANP) | 716 |
| PRKCB | P05126 | Protein kinase C beta type (PKC-B) (PKC-beta) (EC 2.7.11.13) | 671 |
| LYN | O97790 | TBC1 domain family member 1 (Lyncein) | 1165 |
| PI4KA | O02811 | Phosphatidylinositol 4-kinase alpha (PI4-kinase alpha) (PI4K-alpha) (PtdIns-4-kinase alpha) (EC 2.7.1.67) | 2102 |
| ATP2A1 | Q0VCY0 | Sarcoplasmic/endoplasmic reticulum calcium ATPase 1 (SERCA1) (SR Ca(2+)-ATPase 1) (EC 7.2.2.10) (Calcium pump 1) (Calcium-transporting ATPase sarcoplasmic reticulum type, fast twitch skeletal muscle isoform) (Endoplasmic reticulum class 1/2 Ca(2+) ATPase) | 993 |
| ACTN1 | Q3B7N2 | Alpha-actinin-1 (Alpha-actinin cytoskeletal isoform) (F-actin cross-linking protein) (Non-muscle alpha-actinin-1) | 892 |
| IRAK4 | Q1RMT8 | Interleukin-1 receptor-associated kinase 4 (IRAK-4) (EC 2.7.11.1) | 461 |
| CSNK1D | P35508 | Casein kinase I isoform delta (CKI-delta) (CKId) (EC 2.7.11.1) (Tau-protein kinase CSNK1D) (EC 2.7.11.26) | 415 |
| SLC1A1 | Q95135 | Excitatory amino acid transporter 3 (Excitatory amino-acid carrier 1) (Renal high affinity glutamate transporter EAAC1) (Sodium-dependent glutamate/aspartate transporter 3) (Solute carrier family 1 member 1) | 524 |
| PTPRF | A7MBJ4 | Receptor-type tyrosine-protein phosphatase F (EC 3.1.3.48) | 1898 |
| CSNK1A1 | P67827 | Casein kinase I isoform alpha (CKI-alpha) (EC 2.7.11.1) (CK1) | 325 |
| CYP19A1 | P46194 | Aromatase (EC 1.14.14.14) (CYPXIX) (Cytochrome P-450AROM) (Cytochrome P450 19A1) (Estrogen synthase) | 503 |
| INS | P01317 | Insulin [Cleaved into: Insulin B chain; Insulin A chain] | 105 |
| IGF1 | P07455 | Insulin-like growth factor 1 (Insulin-like growth factor I) (IGF-I) (Somatomedin) | 154 |
| MSH2 | Q3MHE4 | DNA mismatch repair protein Msh2 (MutS protein homolog 2) | 934 |
| MTHFR | Q5I598 | Methylenetetrahydrofolate reductase (NADPH) (EC 1.5.1.53) | 655 |
| ESR2 | Q9XSB5 | Estrogen receptor beta (ER-beta) (Nuclear receptor subfamily 3 group A member 2) | 527 |
| POR | Q3SYT8 | NADPH--cytochrome P450 reductase (CPR) (P450R) (EC 1.6.2.4) | 678 |
| ALB | P02769 | Albumin (BSA) (allergen Bos d 6) | 607 |
| VWF | P80012 | von Willebrand factor (vWF) | 937 |
| VEGFA | P15691 | Vascular endothelial growth factor A (VEGF-A) (Vascular permeability factor) (VPF) | 190 |
| POMC | P01190 | Pro-opiomelanocortin (POMC) (Corticotropin-lipotropin) [Cleaved into: NPP; Melanotropin gamma (Gamma-MSH); Corticotropin (Adrenocorticotropic hormone) (ACTH); Melanocyte-stimulating hormone alpha (Alpha-MSH) (Melanotropin alpha); Corticotropin-like intermediary peptide (CLIP); Lipotropin beta (Beta-LPH); Lipotropin gamma (Gamma-LPH); Melanocyte-stimulating hormone beta (Beta-MSH) (Melanotropin beta); Beta-endorphin; Met-enkephalin] | 265 |
| IGF2 | P07456 | Insulin-like growth factor 2 (Erythrotropin) (Insulin-like growth factor II) (IGF-II) [Cleaved into: Preptin] | 179 |
| EPCAM | Q3T0L5 | Epithelial cell adhesion molecule (Ep-CAM) (Tumor-associated calcium signal transducer 1) (CD antigen CD326) | 314 |
| CAV1 | P79132 | Caveolin-1 | 178 |
| SLC6A4 | Q9XT49 | Sodium-dependent serotonin transporter (SERT) (5HT transporter) (5HTT) (Solute carrier family 6 member 4) | 630 |
| TTR | O46375 | Transthyretin (Prealbumin) | 147 |
| SDHB | Q3T189 | Succinate dehydrogenase [ubiquinone] iron-sulfur subunit, mitochondrial (EC 1.3.5.1) (Iron-sulfur subunit of complex II) (IP) (Malate dehydrogenase [quinone] iron-sulfur subunit) (EC 1.1.5.-) | 280 |
| ERCC2 | A6QLJ0 | General transcription and DNA repair factor IIH helicase subunit XPD (TFIIH subunit XPD) (EC 5.6.2.3) (CXPD) (DNA 5'-3' helicase XPD) (DNA excision repair protein ERCC-2) (DNA repair protein complementing XP-D cells) (Xeroderma pigmentosum group D-complementing protein) | 760 |
| DICER1 | Q6TUI4 | Endoribonuclease Dicer (EC 3.1.26.3) | 1923 |
| HIF1A | Q9XTA5 | Hypoxia-inducible factor 1-alpha (HIF-1-alpha) (HIF1-alpha) | 823 |
| HPRT1 | Q3SZ18 | Hypoxanthine-guanine phosphoribosyltransferase (HGPRT) (HGPRTase) (EC 2.4.2.8) | 218 |
| VDR | Q28037 | Vitamin D3 receptor (VDR) (1,25-dihydroxyvitamin D3 receptor) (Nuclear receptor subfamily 1 group I member 1) | 426 |
| MTR | Q4JIJ3 | Methionine synthase (MS) (EC 2.1.1.13) (5-methyltetrahydrofolate--homocysteine methyltransferase) (Cobalamin-dependent methionine synthase) (Vitamin-B12 dependent methionine synthase) | 1265 |
| DHFR | P00376 | Dihydrofolate reductase (EC 1.5.1.3) | 187 |
| PAX6 | Q1LZF1 | Paired box protein Pax-6 (Oculorhombin) | 422 |
| SMC1A | O97593 | Structural maintenance of chromosomes protein 1A (SMC protein 1A) (SMC-1A) | 1233 |
| IKBKG | Q95KU9 | NF-kappa-B essential modulator (NEMO) (IkB kinase-associated protein 1) (IKKAP1) (Inhibitor of nuclear factor kappa-B kinase subunit gamma) (I-kappa-B kinase subunit gamma) (IKK-gamma) (IKKG) (IkB kinase subunit gamma) (NF-kappa-B essential modifier) | 419 |
| MUC1 | Q8WML4 | Mucin-1 (MUC-1) (CD antigen CD227) [Cleaved into: Mucin-1 subunit alpha (MUC1-NT) (MUC1-alpha); Mucin-1 subunit beta (MUC1-beta) (MUC1-CT)] | 580 |
| FOLR1 | P02702 | Folate receptor alpha (FR-alpha) (Folate receptor 1) (Folate-binding protein 1) (FBP) (Milk folate-binding protein) | 241 |
| HSPD1 | P31081 | 60 kDa heat shock protein, mitochondrial (EC 5.6.1.7) (60 kDa chaperonin) (Chaperonin 60) (CPN60) (Heat shock protein 60) (HSP-60) (Hsp60) (Mitochondrial matrix protein P1) | 573 |
| SOD2 | P41976 | Superoxide dismutase [Mn], mitochondrial (EC 1.15.1.1) | 222 |
| TYR | Q8MIU0 | Tyrosinase (EC 1.14.18.1) (Monophenol monooxygenase) | 530 |
| DES | O62654 | Desmin | 470 |
| ERCC3 | Q1RMT1 | General transcription and DNA repair factor IIH helicase/translocase subunit XPB (TFIIH subunit XPB) (EC 5.6.2.4) (DNA 3'-5' helicase/translocase XPB) (DNA excision repair protein ERCC-3) | 782 |
| CYBB | O46522 | NADPH oxidase 2 (EC 1.6.3.-) (CGD91-phox) (Cytochrome b(558) subunit beta) (Cytochrome b558 subunit beta) (Cytochrome b-245 heavy chain) (Heme-binding membrane glycoprotein gp91phox) (Neutrophil cytochrome b 91 kDa polypeptide) (gp91-1) (gp91-phox) (p22 phagocyte B-cytochrome) | 570 |
| GFAP | Q28115 | Glial fibrillary acidic protein (GFAP) | 428 |
| EDN1 | P17322 | Endothelin-1 (ET-1) (Preproendothelin-1) (PPET1) [Cleaved into: Big endothelin-1] | 202 |
| CYCS | P62894 | Cytochrome c | 105 |
| MIF | P80177 | Macrophage migration inhibitory factor (MIF) (EC 5.3.2.1) (L-dopachrome isomerase) (L-dopachrome tautomerase) (EC 5.3.3.12) (Phenylpyruvate tautomerase) (p12A) | 115 |
| HMGCR | A7Z064 | 3-hydroxy-3-methylglutaryl-coenzyme A reductase (HMG-CoA reductase) (EC 1.1.1.34) | 888 |
| SMPD1 | Q0VD19 | Sphingomyelin phosphodiesterase (EC 3.1.4.12) (EC 3.1.4.3) (Acid sphingomyelinase) (aSMase) [Cleaved into: Sphingomyelin phosphodiesterase, processed form] | 625 |
| HDAC8 | Q0VCB2 | Histone deacetylase 8 (HD8) (EC 3.5.1.98) (Protein deacetylase HDAC8) (EC 3.5.1.-) (Protein decrotonylase HDAC8) (EC 3.5.1.-) | 377 |
| TSHR | Q27987 | Thyrotropin receptor (Thyroid-stimulating hormone receptor) (TSH-R) | 763 |
| CD44 | Q29423 | CD44 antigen (Extracellular matrix receptor III) (ECMR-III) (GP90 lymphocyte homing/adhesion receptor) (HUTCH-I) (Hermes antigen) (Hyaluronate receptor) (Phagocytic glycoprotein 1) (PGP-1) (Phagocytic glycoprotein I) (PGP-I) (CD antigen CD44) | 366 |
| HTR2A | Q75Z89 | 5-hydroxytryptamine receptor 2A (5-HT-2) (5-HT-2A) (Serotonin receptor 2A) | 470 |
| NR2F2 | Q9TTR7 | COUP transcription factor 2 (COUP-TF2) (COUP transcription factor II) (COUP-TF II) (Nuclear receptor subfamily 2 group F member 2) | 414 |
| SDHA | P31039 | Succinate dehydrogenase [ubiquinone] flavoprotein subunit, mitochondrial (EC 1.3.5.1) (Flavoprotein subunit of complex II) (Fp) (Malate dehydrogenase [quinone] flavoprotein subunit) (EC 1.1.5.-) | 665 |
| PSAP | P26779 | Prosaposin (Proactivator polypeptide) [Cleaved into: Saposin-A (Protein A); Saposin-B (Cerebroside sulfate activator) (CSAct) (Dispersin) (Sphingolipid activator protein 1) (SAP-1) (Sulfatide/GM1 activator); Saposin-C (A1 activator) (Co-beta-glucosidase) (Glucosylceramidase activator) (Sphingolipid activator protein 2) (SAP-2); Saposin-D (Component C) (Protein C)] | 525 |
| LIPE | P16386 | Hormone-sensitive lipase (HSL) (EC 3.1.1.79) (Monoacylglycerol lipase LIPE) (EC 3.1.1.23) (Retinyl ester hydrolase) (REH) | 756 |
| AHCY | Q3MHL4 | Adenosylhomocysteinase (AdoHcyase) (EC 3.13.2.1) (S-adenosyl-L-homocysteine hydrolase) | 432 |
| F7 | P22457 | Coagulation factor VII (EC 3.4.21.21) (Serum prothrombin conversion accelerator) [Cleaved into: Factor VII light chain; Factor VII heavy chain] | 447 |
| STXBP1 | P61763 | Syntaxin-binding protein 1 (N-Sec1) (Protein unc-18 homolog 1) (Unc18-1) (Protein unc-18 homolog A) (Unc-18A) (p67) | 594 |
| COL3A1 | P04258 | Collagen alpha-1(III) chain | 1049 |
| NOD2 | Q6E804 | Nucleotide-binding oligomerization domain-containing protein 2 (Caspase recruitment domain-containing protein 15) | 1013 |
| FUCA1 | Q2KIM0 | Tissue alpha-L-fucosidase (EC 3.2.1.51) (Alpha-L-fucosidase I) (Alpha-L-fucoside fucohydrolase 1) (Alpha-L-fucosidase 1) | 468 |
| PKD2 | Q4GZT3 | Polycystin-2 (Polycystic kidney disease 2 protein homolog) (Transient receptor potential cation channel subfamily P member 2) | 970 |
| TNNT2 | P13789 | Troponin T, cardiac muscle (TnTc) (Cardiac muscle troponin T) (cTnT) | 285 |
| COL1A2 | P02465 | Collagen alpha-2(I) chain (Alpha-2 type I collagen) | 1364 |
| ANGPT2 | O77802 | Angiopoietin-2 (ANG-2) | 496 |
| CD46 | Q6VE48 | Membrane cofactor protein (CD antigen CD46) | 361 |
| OPRM1 | P79350 | Mu-type opioid receptor (M-OR-1) (MOR-1) | 401 |
| TNNI3 | P08057 | Troponin I, cardiac muscle (Cardiac troponin I) | 212 |
| PRNP | P10279 | Major prion protein (PrP) (Major scrapie-associated fibril protein 1) (CD antigen CD230) | 264 |
| CD8A | P31783 | T-cell surface glycoprotein CD8 alpha chain (CD antigen CD8a) | 242 |
| IL2RG | Q95118 | Cytokine receptor common subunit gamma (Interleukin-2 receptor subunit gamma) (IL-2 receptor subunit gamma) (IL-2R subunit gamma) (IL-2RG) (gammaC) (p64) (CD antigen CD132) | 379 |
| CCND2 | Q0P5D3 | G1/S-specific cyclin-D2 | 289 |
| DNM1L | Q2KIA5 | Dynamin-1-like protein (EC 3.6.5.5) | 749 |
| FASN | Q71SP7 | Fatty acid synthase (EC 2.3.1.85) [Includes: [Acyl-carrier-protein] S-acetyltransferase (EC 2.3.1.38); [Acyl-carrier-protein] S-malonyltransferase (EC 2.3.1.39); 3-oxoacyl-[acyl-carrier-protein] synthase (EC 2.3.1.41); 3-oxoacyl-[acyl-carrier-protein] reductase (EC 1.1.1.100); 3-hydroxyacyl-[acyl-carrier-protein] dehydratase (EC 4.2.1.59); Enoyl-[acyl-carrier-protein] reductase (EC 1.3.1.39); Acyl-[acyl-carrier-protein] hydrolase (EC 3.1.2.14)] | 2513 |
| CD79A | P40293 | B-cell antigen receptor complex-associated protein alpha chain (Ig-alpha) (MB-1 membrane glycoprotein) (Membrane-bound immunoglobulin-associated protein) (Surface IgM-associated protein) (CD antigen CD79a) | 223 |
| KCNMA1 | Q28204 | Calcium-activated potassium channel subunit alpha-1 (BK channel) (BKCA alpha) (Calcium-activated potassium channel, subfamily M subunit alpha-1) (K(VCA)alpha) (KCa1.1) (Maxi K channel) (MaxiK) (Slo-alpha) (Slo1) (Slowpoke homolog) (Slo homolog) (bSlo) | 1166 |
| SCNN1B | A5D7U4 | Epithelial sodium channel subunit beta (Amiloride-sensitive sodium channel subunit beta) (Beta-NaCH) (Epithelial Na(+) channel subunit beta) (Beta-ENaC) (Nonvoltage-gated sodium channel 1 subunit beta) (SCNEB) | 641 |
| SLC25A4 | P02722 | ADP/ATP translocase 1 (ADP,ATP carrier protein 1) (ADP,ATP carrier protein, heart isoform T1) (Adenine nucleotide translocator 1) (ANT 1) (Solute carrier family 25 member 4) | 298 |
| ABCC1 | Q8HXQ5 | Multidrug resistance-associated protein 1 (EC 7.6.2.2) (ATP-binding cassette sub-family C member 1) (Glutathione-S-conjugate-translocating ATPase ABCC1) (EC 7.6.2.3) (Leukotriene C(4) transporter) (LTC4 transporter) | 1530 |
| UBA1 | A3KMV5 | Ubiquitin-like modifier-activating enzyme 1 (EC 6.2.1.45) (Ubiquitin-activating enzyme E1) | 1058 |
| RPL11 | Q3T087 | Large ribosomal subunit protein uL5 (60S ribosomal protein L11) | 178 |
| ACHE | P23795 | Acetylcholinesterase (AChE) (EC 3.1.1.7) | 613 |
| CAPN3 | P51186 | Calpain-3 (EC 3.4.22.54) (Calcium-activated neutral proteinase 3) (CANP 3) (Calpain L3) (Calpain p94) (Muscle-specific calcium-activated neutral protease 3) (New calpain 1) (nCL-1) | 822 |
| ACTA1 | P68138 | Actin, alpha skeletal muscle (EC 3.6.4.-) (Alpha-actin-1) [Cleaved into: Actin, alpha skeletal muscle, intermediate form] | 377 |
| JUP | Q8SPJ1 | Junction plakoglobin (Desmoplakin III) (Desmoplakin-3) | 745 |
| KCNJ2 | O19182 | Inward rectifier potassium channel 2 (BIK) (Inward rectifier K(+) channel Kir2.1) (IRK-1) (Potassium channel, inwardly rectifying subfamily J member 2) | 427 |
| KCNJ5 | F1MYR9 | G protein-activated inward rectifier potassium channel 4 (GIRK-4) (Cardiac inward rectifier) (Heart KATP channel) (Inward rectifier K(+) channel Kir3.4) (KATP-1) (Potassium channel, inwardly rectifying subfamily J member 5) | 419 |
| FGG | P12799 | Fibrinogen gamma-B chain (Gamma') | 444 |
| ACTA2 | P62739 | Actin, aortic smooth muscle (EC 3.6.4.-) (Alpha-actin-2) [Cleaved into: Actin, aortic smooth muscle, intermediate form] | 377 |
| KNG1 | P01044 | Kininogen-1 (Kininogen I) (Thiol proteinase inhibitor) [Cleaved into: Kininogen-1 heavy chain; Bradykinin (Kallidin I); Lysyl-bradykinin (Kallidin II); Kininogen-1 light chain] | 621 |
| GABRG2 | P22300 | Gamma-aminobutyric acid receptor subunit gamma-2 (GABA(A) receptor subunit gamma-2) (GABAAR subunit gamma-2) | 475 |
| HSPA5 | Q0VCX2 | Endoplasmic reticulum chaperone BiP (EC 3.6.4.10) (78 kDa glucose-regulated protein) (GRP-78) (Binding-immunoglobulin protein) (BiP) (Heat shock protein 70 family protein 5) (HSP70 family protein 5) (Heat shock protein family A member 5) (Immunoglobulin heavy chain-binding protein) | 655 |
| TPM1 | Q5KR49 | Tropomyosin alpha-1 chain (Alpha-tropomyosin) (Tropomyosin-1) | 284 |
| FST | P50291 | Follistatin (FS) (Activin-binding protein) | 344 |
| ITGA3 | F1MMS9 | Integrin alpha-3 (CD49 antigen-like family member C) (Galactoprotein B3) (GAPB3) (VLA-3 subunit alpha) (CD antigen CD49c) [Cleaved into: Integrin alpha-3 heavy chain; Integrin alpha-3 light chain] | 1050 |
| CYLD | Q1RMU2 | Ubiquitin carboxyl-terminal hydrolase CYLD (EC 3.4.19.12) (Deubiquitinating enzyme CYLD) (Ubiquitin thioesterase CYLD) (Ubiquitin-specific-processing protease CYLD) | 953 |
| ENO1 | Q9XSJ4 | Alpha-enolase (EC 4.2.1.11) (2-phospho-D-glycerate hydro-lyase) (Enolase 1) (HAP47) (Non-neural enolase) (NNE) (Phosphopyruvate hydratase) | 434 |
| MYL2 | Q3SZE5 | Myosin regulatory light chain 2, ventricular/cardiac muscle isoform (MLC-2) (MLC-2v) (Myosin light chain 2, slow skeletal/ventricular muscle isoform) (MLC-2s/v) | 166 |
| AQP2 | P79099 | Aquaporin-2 (AQP-2) (ADH water channel) (Aquaporin-CD) (AQP-CD) (Collecting duct water channel protein) (WCH-CD) (Water channel protein for renal collecting duct) | 271 |
| NPR2 | P46197 | Atrial natriuretic peptide receptor 2 (EC 4.6.1.2) (Atrial natriuretic peptide receptor type B) (ANP-B) (ANPR-B) (NPR-B) (Guanylate cyclase B) (GC-B) | 1047 |
| NCAM1 | P31836 | Neural cell adhesion molecule 1 (N-CAM-1) (NCAM-1) | 853 |
| GLUL | P15103 | Glutamine synthetase (GS) (EC 6.3.1.2) (Glutamate--ammonia ligase) (Palmitoyltransferase GLUL) (EC 2.3.1.225) | 373 |
| OAT | Q3ZCF5 | Ornithine aminotransferase, mitochondrial (EC 2.6.1.13) (Ornithine--oxo-acid aminotransferase) | 439 |
| F12 | P98140 | Coagulation factor XII (EC 3.4.21.38) (Hageman factor) (HAF) [Cleaved into: Coagulation factor XIIa heavy chain; Coagulation factor XIIa light chain] | 612 |
| ATP1A2 | A2VDL6 | Sodium/potassium-transporting ATPase subunit alpha-2 (Na(+)/K(+) ATPase alpha-2 subunit) (EC 7.2.2.13) (Sodium pump subunit alpha-2) | 1020 |
| GABRB2 | P0C2W5 | Gamma-aminobutyric acid receptor subunit beta-2 (GABA(A) receptor subunit beta-2) (GABAAR subunit beta-2) | 472 |
| NRXN1 | Q28142 | Neurexin-1-beta (Neurexin I-beta) | 467 |
| NRXN1 | Q28146 | Neurexin-1 (Neurexin I-alpha) (Neurexin-1-alpha) | 1530 |
| SLC16A1 | Q3MHW6 | Monocarboxylate transporter 1 (MCT 1) (Solute carrier family 16 member 1) | 501 |
| IMPDH1 | A0JNA3 | Inosine-5'-monophosphate dehydrogenase 1 (IMP dehydrogenase 1) (IMPD 1) (IMPDH 1) (EC 1.1.1.205) | 514 |
| CD28 | Q28071 | T-cell-specific surface glycoprotein CD28 (CD antigen CD28) | 219 |
| HSPA9 | Q3ZCH0 | Stress-70 protein, mitochondrial (EC 3.6.4.10) (75 kDa glucose-regulated protein) (GRP-75) (Heat shock 70 kDa protein 9) | 679 |
| PRKACB | P05131 | cAMP-dependent protein kinase catalytic subunit beta (PKA C-beta) (EC 2.7.11.11) | 351 |
| ECE1 | P42891 | Endothelin-converting enzyme 1 (ECE-1) (EC 3.4.24.71) | 754 |
| TUBG1 | Q0VCD2 | Tubulin gamma-1 chain (Gamma-1-tubulin) | 451 |
| YWHAG | P68252 | 14-3-3 protein gamma (Protein kinase C inhibitor protein 1) (KCIP-1) [Cleaved into: 14-3-3 protein gamma, N-terminally processed] | 247 |
| ODC1 | P27117 | Ornithine decarboxylase (ODC) (EC 4.1.1.17) | 461 |
| STK4 | Q5E9L6 | Serine/threonine-protein kinase 4 (EC 2.7.11.1) (Mammalian STE20-like protein kinase 1) (MST-1) (STE20-like kinase MST1) [Cleaved into: Serine/threonine-protein kinase 4 37kDa subunit (MST1/N); Serine/threonine-protein kinase 4 18kDa subunit (MST1/C)] | 487 |
| PFKM | Q0IIG5 | ATP-dependent 6-phosphofructokinase, muscle type (ATP-PFK) (PFK-M) (EC 2.7.1.11) (6-phosphofructokinase type A) (Phosphofructo-1-kinase isozyme A) (PFK-A) (Phosphohexokinase) | 779 |
| FURIN | Q28193 | Furin (EC 3.4.21.75) (Dibasic-processing enzyme) (Paired basic amino acid residue-cleaving enzyme) (PACE) (Trans Golgi network protease furin) | 797 |
| SCD | Q9TT94 | Stearoyl-CoA desaturase (EC 1.14.19.1) (Acyl-CoA desaturase) (Delta(9)-desaturase) (Delta-9 desaturase) (Fatty acid desaturase) | 359 |
| CHRM3 | P41984 | Muscarinic acetylcholine receptor M3 | 590 |
| ITGAV | P80746 | Integrin alpha-V (Vitronectin receptor subunit alpha) (CD antigen CD51) [Cleaved into: Integrin alpha-V heavy chain; Integrin alpha-V light chain] | 1048 |
| EEF2 | Q3SYU2 | Elongation factor 2 (EF-2) (EC 3.6.5.-) | 858 |
| CDC25C | A5D7P0 | M-phase inducer phosphatase 3 (EC 3.1.3.48) (Dual specificity phosphatase Cdc25C) | 477 |
| ITGB6 | Q8SQB8 | Integrin beta-6 | 788 |
| IMPDH2 | Q3SWY3 | Inosine-5'-monophosphate dehydrogenase 2 (IMP dehydrogenase 2) (IMPD 2) (IMPDH 2) (EC 1.1.1.205) (IMPDH-II) | 514 |
| GABRA5 | Q08E50 | Gamma-aminobutyric acid receptor subunit alpha-5 (GABA(A) receptor subunit alpha-5) (GABAAR subunit alpha-5) | 462 |
| CDC25A | A7MBD1 | M-phase inducer phosphatase 1 (EC 3.1.3.48) (Dual specificity phosphatase Cdc25A) | 525 |
| ROCK1 | Q8MIT6 | Rho-associated protein kinase 1 (EC 2.7.11.1) (Rho-associated, coiled-coil-containing protein kinase 1) (Rho-associated, coiled-coil-containing protein kinase I) (ROCK-I) (p160 ROCK-1) (p160ROCK) | 441 |
| FKBP1A | P18203 | Peptidyl-prolyl cis-trans isomerase FKBP1A (PPIase FKBP1A) (EC 5.2.1.8) (12 kDa FK506-binding protein) (12 kDa FKBP) (FKBP-12) (Calstabin-1) (FK506-binding protein 1A) (FKBP-1A) (Immunophilin FKBP12) (Rotamase) | 108 |
| CSNK2B | P67868 | Casein kinase II subunit beta (CK II beta) (Phosvitin) | 215 |
| SLC2A3 | P58352 | Solute carrier family 2, facilitated glucose transporter member 3 (Glucose transporter type 3, brain) (GLUT-3) | 494 |
| SLC6A9 | Q28039 | Sodium- and chloride-dependent glycine transporter 1 (GlyT-1) (GlyT1) (Solute carrier family 6 member 9) | 638 |
| YWHAZ | P63103 | 14-3-3 protein zeta/delta (Factor activating exoenzyme S) (FAS) (Protein kinase C inhibitor protein 1) (KCIP-1) | 245 |
| ENO3 | Q3ZC09 | Beta-enolase (EC 4.2.1.11) (2-phospho-D-glycerate hydro-lyase) (Enolase 3) (Muscle-specific enolase) (MSE) (Skeletal muscle enolase) | 434 |
| PLCB1 | P10894 | 1-phosphatidylinositol 4,5-bisphosphate phosphodiesterase beta-1 (EC 3.1.4.11) (PLC-154) (Phosphoinositide phospholipase C-beta-1) (Phospholipase C-beta-1) (PLC-beta-1) | 1216 |
| IDE | Q24K02 | Insulin-degrading enzyme (EC 3.4.24.56) (Insulin protease) (Insulinase) (Insulysin) | 1019 |
| GRK2 | P21146 | Beta-adrenergic receptor kinase 1 (Beta-ARK-1) (EC 2.7.11.15) (G-protein-coupled receptor kinase 2) | 689 |
| RDX | Q32LP2 | Radixin | 583 |
| CASP6 | Q3T0P5 | Caspase-6 (CASP-6) (EC 3.4.22.59) [Cleaved into: Caspase-6 subunit p18; Caspase-6 subunit p11] | 293 |
| NFATC1 | P98201 | Nuclear factor of activated T-cells, cytoplasmic 1 (NF-ATc1) (NFATc1) (NFAT transcription complex cytosolic component) (NF-ATc) (NFATc) | 803 |
| IFNAR2 | Q95141 | Interferon alpha/beta receptor 2 (IFN-R-2) (IFN-alpha/beta receptor 2) (Type I interferon receptor 2) | 530 |
| IFNAR1 | Q04790 | Interferon alpha/beta receptor 1 (IFN-R-1) (IFN-alpha/beta receptor 1) (Type I interferon receptor 1) | 560 |
| ADCY1 | P19754 | Adenylate cyclase type 1 (EC 4.6.1.1) (ATP pyrophosphate-lyase 1) (Adenylate cyclase type I) (Adenylyl cyclase 1) (AC1) (Ca(2+)/calmodulin-activated adenylyl cyclase) | 1134 |
| MAPK7 | A5PKJ4 | Mitogen-activated protein kinase 7 (MAP kinase 7) (MAPK 7) (EC 2.7.11.24) | 781 |
| CHRM2 | P41985 | Muscarinic acetylcholine receptor M2 | 465 |
| PLCD1 | P10895 | 1-phosphatidylinositol 4,5-bisphosphate phosphodiesterase delta-1 (EC 3.1.4.11) (Phosphoinositide phospholipase C-delta-1) (Phospholipase C-III) (PLC-III) (Phospholipase C-delta-1) (PLC-delta-1) | 756 |
| PKN1 | A1A4I4 | Serine/threonine-protein kinase N1 (EC 2.7.11.13) (Protein kinase C-like 1) (Protein kinase C-like PKN) (Protein kinase PKN-alpha) (Protein-kinase C-related kinase 1) (Serine-threonine protein kinase N) | 944 |
| CEBPA | O02754 | CCAAT/enhancer-binding protein alpha (C/EBP alpha) | 353 |
| FSHR | P35376 | Follicle-stimulating hormone receptor (FSH-R) (Follitropin receptor) | 695 |
| IL10 | P43480 | Interleukin-10 (IL-10) (Cytokine synthesis inhibitory factor) (CSIF) | 178 |
| IL1B | P09428 | Interleukin-1 beta (IL-1 beta) | 266 |
| MC1R | P47798 | Melanocyte-stimulating hormone receptor (MSH-R) (BDF3) (Melanocortin receptor 1) (MC1-R) | 317 |
| DHCR7 | Q5E9J5 | 7-dehydrocholesterol reductase (7-DHC reductase) (EC 1.3.1.21) (Cholesterol-5,6-epoxide hydrolase subunit DHCR7) (EC 3.3.2.11) (Sterol Delta(7)-reductase) | 475 |
| FBN1 | P98133 | Fibrillin-1 (MP340) [Cleaved into: Asprosin] | 2871 |
| F5 | Q28107 | Coagulation factor V (Activated protein C cofactor) [Cleaved into: Coagulation factor V heavy chain; Coagulation factor V light chain] | 2211 |
| POLD1 | P28339 | DNA polymerase delta catalytic subunit (EC 2.7.7.7) (3'-5' exodeoxyribonuclease) (EC 3.1.11.-) | 1106 |
| FANCC | O19104 | Fanconi anemia group C protein homolog (Protein FACC) | 567 |
| OTC | Q9N1U7 | Ornithine transcarbamylase, mitochondrial (OTCase) (EC 2.1.3.3) (Ornithine carbamoyltransferase, mitochondrial) | 354 |
| AFP | Q3SZ57 | Alpha-fetoprotein (Alpha-1-fetoprotein) (Alpha-fetoglobulin) | 610 |
| PDHA1 | A7MB35 | Pyruvate dehydrogenase E1 component subunit alpha, somatic form, mitochondrial (EC 1.2.4.1) (PDHE1-A type I) | 390 |
| F9 | P00741 | Coagulation factor IX (EC 3.4.21.22) (Christmas factor) [Cleaved into: Coagulation factor IXa light chain; Coagulation factor IXa heavy chain] | 462 |
| PRLR | Q28172 | Prolactin receptor (PRL-R) | 581 |
| GJB1 | O18968 | Gap junction beta-1 protein (Connexin-32) (Cx32) | 284 |
| TNFRSF11B | A5D7R1 | Tumor necrosis factor receptor superfamily member 11B (Osteoprotegerin) | 402 |
| CCR5 | Q2HJ17 | C-C chemokine receptor type 5 (C-C CKR-5) (CC-CKR-5) (CCR-5) (CCR5) (CD antigen CD195) | 352 |
| FXN | Q05B87 | Frataxin, mitochondrial (Fxn) (EC 1.16.3.1) [Cleaved into: Frataxin intermediate form; Frataxin mature form; Extramitochondrial frataxin] | 217 |
| DUSP6 | Q2KJ36 | Dual specificity protein phosphatase 6 (EC 3.1.3.16) (EC 3.1.3.48) | 381 |
| MYH7 | Q9BE39 | Myosin-7 (Myosin heavy chain 7) (Myosin heavy chain slow isoform) (MyHC-slow) (Myosin heavy chain, cardiac muscle beta isoform) (MyHC-beta) | 1935 |
| PAH | Q2KIH7 | Phenylalanine-4-hydroxylase (PAH) (EC 1.14.16.1) (Phe-4-monooxygenase) | 451 |
| XDH | P80457 | Xanthine dehydrogenase/oxidase [Includes: Xanthine dehydrogenase (XD) (EC 1.17.1.4); Xanthine oxidase (XO) (EC 1.17.3.2) (Xanthine oxidoreductase) (XOR)] | 1332 |
| CYBA | O46521 | Cytochrome b-245 light chain (Cytochrome b(558) alpha chain) (Cytochrome b558 subunit alpha) (Neutrophil cytochrome b 22 kDa polypeptide) (Superoxide-generating NADPH oxidase light chain subunit) (p22 phagocyte B-cytochrome) (p22-phox) (p22phox) | 191 |
| COL4A1 | Q7SIB2 | Collagen alpha-1(IV) chain [Cleaved into: Arresten] | 1669 |
| KITLG | Q28132 | Kit ligand (Mast cell growth factor) (MGF) (Stem cell factor) (SCF) (c-Kit ligand) [Cleaved into: Soluble KIT ligand (sKITLG)] | 274 |
| CLU | P17697 | Clusterin (Glycoprotein III) (GpIII) [Cleaved into: Clusterin beta chain; Clusterin alpha chain] | 439 |
| ARSA | Q08DD1 | Arylsulfatase A (ASA) (EC 3.1.6.8) (Cerebroside-sulfatase) | 507 |
| HEXA | Q0V8R6 | Beta-hexosaminidase subunit alpha (EC 3.2.1.52) (Beta-N-acetylhexosaminidase subunit alpha) (Hexosaminidase subunit A) (N-acetyl-beta-glucosaminidase subunit alpha) | 529 |
| PARK7 | Q5E946 | Parkinson disease protein 7 homolog (Maillard deglycase) (Parkinsonism-associated deglycase) (Protein DJ-1) (DJ-1) (Protein/nucleic acid deglycase DJ-1) (EC 3.1.2.-, EC 3.5.1.-, EC 3.5.1.124) | 189 |
| PPP2R1A | Q32PI5 | Serine/threonine-protein phosphatase 2A 65 kDa regulatory subunit A alpha isoform (PP2Aa) (Medium tumor antigen-associated 61 kDa protein) (PP2A subunit A isoform PR65-alpha) (PP2A subunit A isoform R1-alpha) | 589 |
| RHO | P02699 | Rhodopsin | 348 |
| PTGS1 | O62664 | Prostaglandin G/H synthase 1 (EC 1.14.99.1) (Cyclooxygenase-1) (COX-1) (Prostaglandin H2 synthase 1) (PGH synthase 1) (PGHS-1) (PHS 1) (Prostaglandin-endoperoxide synthase 1) | 600 |
| HSD17B10 | O02691 | 3-hydroxyacyl-CoA dehydrogenase type-2 (EC 1.1.1.35) (17-beta-estradiol 17-dehydrogenase) (EC 1.1.1.62) (2-methyl-3-hydroxybutyryl-CoA dehydrogenase) (MHBD) (3-alpha-(17-beta)-hydroxysteroid dehydrogenase (NAD(+))) (EC 1.1.1.239) (3-hydroxy-2-methylbutyryl-CoA dehydrogenase) (EC 1.1.1.178) (3-hydroxyacyl-CoA dehydrogenase type II) (3alpha(or 20beta)-hydroxysteroid dehydrogenase) (EC 1.1.1.53) (7-alpha-hydroxysteroid dehydrogenase) (EC 1.1.1.159) (Endoplasmic reticulum-associated amyloid beta-peptide-binding protein) (Mitochondrial ribonuclease P protein 2) (Mitochondrial RNase P protein 2) (Short chain dehydrogenase/reductase family 5C member 1) (Short-chain type dehydrogenase/reductase XH98G2) (Type II HADH) | 261 |
| ANXA5 | P81287 | Annexin A5 (Anchorin CII) (Annexin V) (Annexin-5) (Calphobindin I) (CPB-I) (Endonexin II) (Lipocortin V) (Placental anticoagulant protein 4) (Placental anticoagulant protein I) (PAP-I) (Thromboplastin inhibitor) (Vascular anticoagulant-alpha) (VAC-alpha) | 321 |
| FBLN5 | Q5EA62 | Fibulin-5 (FIBL-5) | 448 |
| PPARGC1A | Q865B7 | Peroxisome proliferator-activated receptor gamma coactivator 1-alpha (PGC-1-alpha) (PPAR-gamma coactivator 1-alpha) (PPARGC-1-alpha) | 796 |
| MVK | Q5E9T8 | Mevalonate kinase (MK) (EC 2.7.1.36) | 396 |
| OXTR | P56449 | Oxytocin receptor (OT-R) | 391 |
| BAP1 | A2VDM8 | Ubiquitin carboxyl-terminal hydrolase BAP1 (EC 3.4.19.12) (BRCA1-associated protein 1) | 711 |
| BAP1 | P23196 | DNA repair nuclease/redox regulator APEX1 (EC 3.1.11.2) (EC 3.1.21.-) (APEX nuclease) (APEN) (Apurinic-apyrimidinic endonuclease 1) (AP endonuclease 1) (Redox factor-1) (REF-1) [Cleaved into: DNA repair nuclease/redox regulator APEX1, mitochondrial] | 318 |
| SMC3 | O97594 | Structural maintenance of chromosomes protein 3 (SMC protein 3) (SMC-3) (Chondroitin sulfate proteoglycan 6) | 1218 |
| ANGPT1 | O18920 | Angiopoietin-1 (ANG-1) | 497 |
| GGCX | Q07175 | Vitamin K-dependent gamma-carboxylase (EC 4.1.1.90) (Gamma-glutamyl carboxylase) (Peptidyl-glutamate 4-carboxylase) (Vitamin K gamma glutamyl carboxylase) | 758 |
| EXT1 | A5D7I4 | Exostosin-1 (EC 2.4.1.225) (N-acetylglucosaminyl-proteoglycan 4-beta-glucuronosyltransferase) | 746 |
| PC | Q29RK2 | Pyruvate carboxylase, mitochondrial (EC 6.4.1.1) (Pyruvic carboxylase) (PCB) | 1178 |
| SCARB1 | O18824 | Scavenger receptor class B member 1 (SRB1) (SR-BI) | 509 |
| SLC2A4 | Q27994 | Solute carrier family 2, facilitated glucose transporter member 4 (Glucose transporter type 4, insulin-responsive) (GLUT-4) | 509 |
| CFH | Q28085 | Complement factor H (H factor 1) | 1236 |
| ADSL | A3KN12 | Adenylosuccinate lyase (ADSL) (ASL) (EC 4.3.2.2) (Adenylosuccinase) (ASase) | 490 |
| GALK1 | A6H768 | Galactokinase (EC 2.7.1.6) (Galactose kinase) | 392 |
| RPS19 | Q32PD5 | Small ribosomal subunit protein eS19 (40S ribosomal protein S19) | 145 |
| CDK1 | P48734 | Cyclin-dependent kinase 1 (CDK1) (EC 2.7.11.22) (EC 2.7.11.23) (Cell division control protein 2 homolog) (Cell division protein kinase 1) (p34 protein kinase) | 297 |
| POU5F1 | O97552 | POU domain, class 5, transcription factor 1 (Octamer-binding protein 3) (Oct-3) (Octamer-binding transcription factor 3) (OTF-3) | 360 |
| GPX4 | Q9N2J2 | Phospholipid hydroperoxide glutathione peroxidase (PHGPx) (EC 1.11.1.12) (Glutathione peroxidase 4) (GPx-4) (GSHPx-4) (EC 1.11.1.9) | 197 |
| TPI1 | Q5E956 | Triosephosphate isomerase (TIM) (EC 5.3.1.1) (Methylglyoxal synthase) (EC 4.2.3.3) (Triose-phosphate isomerase) | 249 |
| F11 | Q5NTB3 | Coagulation factor XI (FXI) (EC 3.4.21.27) (Plasma thromboplastin antecedent) (PTA) [Cleaved into: Coagulation factor XIa heavy chain; Coagulation factor XIa light chain] | 625 |
| IGF2R | P08169 | Cation-independent mannose-6-phosphate receptor (CI Man-6-P receptor) (CI-MPR) (M6PR) (300 kDa mannose 6-phosphate receptor) (MPR 300) (Insulin-like growth factor 2 receptor) (Insulin-like growth factor II receptor) (IGF-II receptor) (CD antigen CD222) | 2499 |
| NCF1 | O77774 | Neutrophil cytosol factor 1 (NCF-1) (47 kDa neutrophil oxidase factor) (NCF-47K) (Neutrophil NADPH oxidase factor 1) (p47-phox) | 392 |
| ACTG1 | P63258 | Actin, cytoplasmic 2 (EC 3.6.4.-) (Gamma-actin) [Cleaved into: Actin, cytoplasmic 2, N-terminally processed] | 375 |
| AVPR2 | P48044 | Vasopressin V2 receptor (V2R) (AVPR V2) (Antidiuretic hormone receptor) (Renal-type arginine vasopressin receptor) | 370 |
| PDP1 | P35816 | [Pyruvate dehydrogenase [acetyl-transferring]]-phosphatase 1, mitochondrial (PDP 1) (EC 3.1.3.43) (Protein phosphatase 2C) (PDPc) (Pyruvate dehydrogenase phosphatase catalytic subunit 1) (PDPC 1) | 538 |
| TFAP2A | A1A4R9 | Transcription factor AP-2-alpha (AP2-alpha) (AP-2 transcription factor) (Activating enhancer-binding protein 2-alpha) (Activator protein 2) (AP-2) | 437 |
| RASA1 | P09851 | Ras GTPase-activating protein 1 (GAP) (GTPase-activating protein) (RasGAP) (Ras p21 protein activator) (p120GAP) | 1044 |
| ALDH1A1 | P48644 | Aldehyde dehydrogenase 1A1 (EC 1.2.1.19) (EC 1.2.1.28) (EC 1.2.1.3) (EC 1.2.1.36) (3-deoxyglucosone dehydrogenase) (ALDH-E1) (ALHDII) (Aldehyde dehydrogenase family 1 member A1) (Aldehyde dehydrogenase, cytosolic) (Retinal dehydrogenase 1) (RALDH 1) (RalDH1) | 501 |
| RPL5 | Q58DW5 | Large ribosomal subunit protein uL18 (60S ribosomal protein L5) | 297 |
| ALDH7A1 | Q2KJC9 | Alpha-aminoadipic semialdehyde dehydrogenase (Alpha-AASA dehydrogenase) (EC 1.2.1.31) (Aldehyde dehydrogenase family 7 member A1) (EC 1.2.1.3) (Antiquitin-1) (Betaine aldehyde dehydrogenase) (EC 1.2.1.8) (Delta1-piperideine-6-carboxylate dehydrogenase) (P6c dehydrogenase) | 539 |
| CDH3 | P19535 | Cadherin-3 (Placental cadherin) (P-cadherin) | 491 |
| IRF1 | Q3SZP0 | Interferon regulatory factor 1 (IRF-1) | 322 |
| DCN | P21793 | Decorin (Bone proteoglycan II) (PG-S2) | 360 |
| PROS1 | P07224 | Vitamin K-dependent protein S | 675 |
| PPT1 | P45478 | Palmitoyl-protein thioesterase 1 (PPT-1) (EC 3.1.2.2) (EC 3.1.2.22) (Palmitoyl-protein hydrolase 1) | 306 |
| VCAN | P81282 | Versican core protein (Chondroitin sulfate proteoglycan core protein 2) (Chondroitin sulfate proteoglycan 2) (Glial hyaluronate-binding protein) (GHAP) (Large fibroblast proteoglycan) (PG-M) | 3381 |
| SERPINH1 | Q2KJH6 | Serpin H1 (Collagen-binding protein) (Colligin) | 418 |
| FADD | Q645M6 | FAS-associated death domain protein (FAS-associating death domain-containing protein) | 209 |
| FGB | P02676 | Fibrinogen beta chain [Cleaved into: Fibrinopeptide B; Fibrinogen beta chain] | 468 |
| F13A1 | P12260 | Coagulation factor XIII A chain (Coagulation factor XIIIa) (EC 2.3.2.13) (Protein-glutamine gamma-glutamyltransferase A chain) (Transglutaminase A chain) | 198 |
| CTNNA1 | Q3MHM6 | Catenin alpha-1 | 906 |
| CAST | P20811 | Calpastatin (Calpain inhibitor) | 705 |
| PCK1 | Q8HYZ4 | Phosphoenolpyruvate carboxykinase, cytosolic [GTP] (PEPCK-C) (EC 4.1.1.32) (Serine-protein kinase PCK1) (EC 2.7.11.-) | 622 |
| LOX | P33072 | Protein-lysine 6-oxidase (EC 1.4.3.13) (Lysyl oxidase) [Cleaved into: Protein-lysine 6-oxidase, long form; Protein-lysine 6-oxidase, short form] | 418 |
| PYGM | P79334 | Glycogen phosphorylase, muscle form (EC 2.4.1.1) (Myophosphorylase) | 842 |
| NMNAT1 | Q0VD50 | Nicotinamide/nicotinic acid mononucleotide adenylyltransferase 1 (NMN/NaMN adenylyltransferase 1) (EC 2.7.7.1) (EC 2.7.7.18) (Nicotinamide mononucleotide adenylyltransferase 1) (NMN adenylyltransferase 1) (Nicotinate-nucleotide adenylyltransferase 1) (NaMN adenylyltransferase 1) | 281 |
| NR4A1 | Q0V8F0 | Nuclear receptor subfamily 4 group A member 1 | 598 |
| NR1H4 | Q3SZL0 | Bile acid receptor (Farnesoid X-activated receptor) (Farnesol receptor HRR-1) (Nuclear receptor subfamily 1 group H member 4) | 482 |
| GPI | Q3ZBD7 | Glucose-6-phosphate isomerase (GPI) (EC 5.3.1.9) (Autocrine motility factor) (AMF) (Neuroleukin) (NLK) (Phosphoglucose isomerase) (PGI) (Phosphohexose isomerase) (PHI) | 557 |
| PLA2G2A | Q56JZ2 | Phospholipase A2, membrane associated (EC 3.1.1.4) (GIIC sPLA2) (Group IIA phospholipase A2) (Phosphatidylcholine 2-acylhydrolase 2A) | 144 |
| MDH2 | Q32LG3 | Malate dehydrogenase, mitochondrial (EC 1.1.1.37) | 338 |
| CCNB1 | Q1LZG6 | G2/mitotic-specific cyclin-B1 | 427 |
| GLRA1 | P57695 | Glycine receptor subunit alpha-1 (Glycine receptor 48 kDa subunit) (Glycine receptor strychnine-binding subunit) | 457 |
| KRT14 | P05785 | Keratin, type I cytoskeletal 14 (Cytokeratin VII) (Cytokeratin-14) (CK-14) (Cytokeratin-7) (Keratin-14) (K14) | 93 |
| CTSA | Q3MI05 | Lysosomal protective protein (EC 3.4.16.5) (Cathepsin A) [Cleaved into: Lysosomal protective protein 32 kDa chain; Lysosomal protective protein 20 kDa chain] | 479 |
| SPTLC1 | Q3MHG1 | Serine palmitoyltransferase 1 (EC 2.3.1.50) (Long chain base biosynthesis protein 1) (LCB 1) (Serine-palmitoyl-CoA transferase 1) (SPT 1) (SPT1) | 473 |
| VRK1 | Q32PI1 | Serine/threonine-protein kinase VRK1 (EC 2.7.11.1) (Vaccinia-related kinase 1) | 396 |
| STX1A | P32850 | Syntaxin-1A (Neuron-specific antigen HPC-1) (Synaptotagmin-associated 35 kDa protein) (P35A) | 288 |
| CFB | P81187 | Complement factor B (EC 3.4.21.47) (C3/C5 convertase) (EC-VMFB) [Cleaved into: Complement factor B Ba; Complement factor B Bb] | 761 |
| SLC18A2 | Q27963 | Synaptic vesicular amine transporter (Monoamine transporter) (Solute carrier family 18 member 2) (Vesicular amine transporter 2) (VAT2) (Vesicular monoamine transporter 2) | 517 |
| CTSL | P25975 | Procathepsin L (EC 3.4.22.15) (Cathepsin L1) [Cleaved into: Cathepsin L; Cathepsin L heavy chain; Cathepsin L light chain] | 334 |
| GABRA1 | P08219 | Gamma-aminobutyric acid receptor subunit alpha-1 (GABA(A) receptor subunit alpha-1) (GABAAR subunit alpha-1) | 456 |
| ANXA2 | P04272 | Annexin A2 (Annexin II) (Annexin-2) (Calpactin I heavy chain) (Calpactin-1 heavy chain) (Chromobindin-8) (Lipocortin II) (Placental anticoagulant protein IV) (PAP-IV) (Protein I) (p36) | 339 |
| TPM3 | Q5KR47 | Tropomyosin alpha-3 chain (Gamma-tropomyosin) (Tropomyosin-3) | 284 |
| GNA11 | P38409 | Guanine nucleotide-binding protein subunit alpha-11 (G alpha-11) (G-protein subunit alpha-11) (G-protein subunit GL2 alpha) | 359 |
| PCCB | Q2TBR0 | Propionyl-CoA carboxylase beta chain, mitochondrial (PCCase subunit beta) (EC 6.4.1.3) (Propanoyl-CoA:carbon dioxide ligase subunit beta) | 539 |
| ITPA | Q2KIC5 | Inosine triphosphate pyrophosphatase (ITPase) (Inosine triphosphatase) (EC 3.6.1.66) (Non-canonical purine NTP pyrophosphatase) (Non-standard purine NTP pyrophosphatase) (Nucleoside-triphosphate diphosphatase) (Nucleoside-triphosphate pyrophosphatase) (NTPase) (XTP/dITP diphosphatase) | 208 |
| MYOD1 | Q7YS82 | Myoblast determination protein 1 | 318 |
| GNAO1 | P08239 | Guanine nucleotide-binding protein G(o) subunit alpha (EC 3.6.5.-) (GTP-binding protein G39) | 354 |
| COMP | P35445 | Cartilage oligomeric matrix protein (COMP) | 756 |
| ADRA2A | Q28838 | Alpha-2A adrenergic receptor (Alpha-2A adrenoreceptor) (Alpha-2A adrenoceptor) (Alpha-2AAR) (Alpha-2D adrenergic receptor) | 468 |
| MSN | Q2HJ49 | Moesin (Membrane-organizing extension spike protein) | 577 |
| ACTN4 | A5D7D1 | Alpha-actinin-4 (Non-muscle alpha-actinin 4) | 911 |
| CDH5 | Q6URK6 | Cadherin-5 (Vascular endothelial cadherin) (VE-cadherin) (CD antigen CD144) | 783 |
| FCGR3A | P79107 | Low affinity immunoglobulin gamma Fc region receptor III-A (IgG Fc receptor III-A) (Fc-gamma RIII-alpha) (FcgammaRIIIA) (CD antigen CD16a) | 250 |
| TGM2 | P51176 | Protein-glutamine gamma-glutamyltransferase 2 (EC 2.3.2.13) (Isopeptidase TGM2) (EC 3.4.-.-) (Protein-glutamine deamidase TGM2) (EC 3.5.1.44) (Protein-glutamine dopaminyltransferase TGM2) (EC 2.3.1.-) (Protein-glutamine histaminyltransferase TGM2) (EC 2.3.1.-) (Protein-glutamine noradrenalinyltransferase TGM2) (EC 2.3.1.-) (Protein-glutamine serotonyltransferase TGM2) (EC 2.3.1.-) (Tissue transglutaminase) (TG) (Transglutaminase-2) (TGase-2) | 687 |
| FLI1 | Q29RS8 | Friend leukemia integration 1 transcription factor (Proto-oncogene Fli-1) | 452 |
| ST3GAL5 | Q70D51 | Lactosylceramide alpha-2,3-sialyltransferase (EC 2.4.3.9) (CMP-NeuAc:lactosylceramide alpha-2,3-sialyltransferase) (Ganglioside GM3 synthase) (ST3Gal V) (ST3GalV) (Sialyltransferase 9) | 420 |
| ACTN2 | Q3ZC55 | Alpha-actinin-2 (Alpha-actinin skeletal muscle isoform 2) (F-actin cross-linking protein) | 894 |
| FGF1 | P03968 | Fibroblast growth factor 1 (FGF-1) (Acidic eye-derived growth factor II) (EDGF II) (Acidic fibroblast growth factor) (aFGF) (Endothelial cell growth factor) (ECGF) (Heparin-binding growth factor 1) (HBGF-1) (Prostatropin) [Cleaved into: Endothelial cell growth factor beta; Endothelial cell growth factor alpha] | 155 |
| THBS2 | Q95116 | Thrombospondin-2 (Corticotropin-induced secreted protein) (CISP) | 1170 |
| GAMT | Q2TBQ3 | Guanidinoacetate N-methyltransferase (EC 2.1.1.2) | 236 |
| PGM1 | Q08DP0 | Phosphoglucomutase-1 (PGM 1) (EC 5.4.2.2) (Glucose phosphomutase 1) | 562 |
| HNRNPA1 | P09867 | Heterogeneous nuclear ribonucleoprotein A1 (hnRNP A1) (Helix-destabilizing protein) (Single-strand RNA-binding protein) (Unwinding protein 1) (UP1) (hnRNP core protein A1) [Cleaved into: Heterogeneous nuclear ribonucleoprotein A1, N-terminally processed] | 320 |
| FECH | P22600 | Ferrochelatase, mitochondrial (EC 4.98.1.1) (Heme synthase) (Protoheme ferro-lyase) | 416 |
| ACAN | P13608 | Aggrecan core protein (Cartilage-specific proteoglycan core protein) (CSPCP) | 2364 |
| HNRNPA2B1 | Q2HJ60 | Heterogeneous nuclear ribonucleoproteins A2/B1 (hnRNP A2/B1) | 341 |
| FYN | A0JNB0 | Tyrosine-protein kinase Fyn (EC 2.7.10.2) (Proto-oncogene c-Fyn) (p59-Fyn) | 537 |
| APRT | Q56JW4 | Adenine phosphoribosyltransferase (APRT) (EC 2.4.2.7) | 180 |
| SLC6A2 | P51143 | Sodium-dependent noradrenaline transporter (Norepinephrine transporter) (NET) (Solute carrier family 6 member 2) | 615 |
| ANXA1 | P46193 | Annexin A1 (Annexin I) (Annexin-1) (Calpactin II) (Calpactin-2) (Chromobindin-9) (Lipocortin I) (Phospholipase A2 inhibitory protein) (p35) [Cleaved into: Annexin Ac2-26] | 346 |
| HSPA1A | Q27975 | Heat shock 70 kDa protein 1A (Heat shock 70 kDa protein 1) (HSP70.1) | 641 |
| KRT8 | P05786 | Keratin, type II cytoskeletal 8 (Cytokeratin-8) (CK-8) (Cytokeratin-A) (Keratin-8) (K8) (Type-II keratin Kb8) | 478 |
| CSTB | P25417 | Cystatin-B (Stefin-B) | 98 |
| CPE | P04836 | Carboxypeptidase E (CPE) (EC 3.4.17.10) (Carboxypeptidase H) (CPH) (Enkephalin convertase) (Prohormone-processing carboxypeptidase) | 475 |
| ITGA5 | Q27977 | Integrin alpha-5 (Fibronectin receptor subunit alpha) (Integrin alpha-F) (VLA-5) [Cleaved into: Integrin alpha-5 heavy chain; Integrin alpha-5 light chain] | 1164 |
| GABRA3 | P10064 | Gamma-aminobutyric acid receptor subunit alpha-3 (GABA(A) receptor subunit alpha-3) (GABAAR subunit alpha-3) | 492 |
| OGDH | Q148N0 | 2-oxoglutarate dehydrogenase complex component E1 (E1o) (OGDC-E1) (OGDH-E1) (EC 1.2.4.2) (2-oxoglutarate dehydrogenase, mitochondrial) (Alpha-ketoglutarate dehydrogenase) (Alpha-KGDH-E1) (Thiamine diphosphate (ThDP)-dependent 2-oxoglutarate dehydrogenase) | 1023 |
| SORD | Q58D31 | Sorbitol dehydrogenase (SDH) (EC 1.1.1.-) (L-iditol 2-dehydrogenase) (EC 1.1.1.14) (Polyol dehydrogenase) (Xylitol dehydrogenase) (XDH) (EC 1.1.1.9) | 356 |
| AQP1 | P47865 | Aquaporin-1 (AQP-1) (Aquaporin-CHIP) (Water channel protein CHIP29) | 271 |
| CAPN2 | Q27971 | Calpain-2 catalytic subunit (EC 3.4.22.53) (Calcium-activated neutral proteinase 2) (CANP 2) (Calpain M-type) (Calpain-2 large subunit) (Millimolar-calpain) (M-calpain) | 700 |
| ATF4 | Q3ZCH6 | Cyclic AMP-dependent transcription factor ATF-4 (cAMP-dependent transcription factor ATF-4) (Activating transcription factor 4) | 348 |
| ATP6V1B2 | P31408 | V-type proton ATPase subunit B, brain isoform (V-ATPase subunit B 2) (Endomembrane proton pump 58 kDa subunit) (Vacuolar proton pump subunit B 2) | 511 |
| PLK4 | A2VDZ4 | Serine/threonine-protein kinase PLK4 (EC 2.7.11.21) (Polo-like kinase 4) (PLK-4) (Serine/threonine-protein kinase Sak) | 893 |
| PIN1 | Q5BIN5 | Peptidyl-prolyl cis-trans isomerase NIMA-interacting 1 (EC 5.2.1.8) (Peptidyl-prolyl cis-trans isomerase Pin1) (PPIase Pin1) (Rotamase Pin1) | 163 |
| CLTC | P49951 | Clathrin heavy chain 1 | 1675 |
| ST14 | Q0IIH7 | Suppressor of tumorigenicity 14 protein homolog (EC 3.4.21.109) (Serine protease 14) | 855 |
| HSF1 | Q08DJ8 | Heat shock factor protein 1 (HSF 1) (Heat shock transcription factor 1) (HSTF 1) | 525 |
| C5 | P12082 | Complement C5a anaphylatoxin | 74 |
| HYAL1 | Q5E985 | Hyaluronidase-1 (Hyal-1) (EC 3.2.1.35) (Hyaluronoglucosaminidase-1) | 450 |
| MAT1A | Q2KJC6 | S-adenosylmethionine synthase isoform type-1 (AdoMet synthase 1) (EC 2.5.1.6) (Methionine adenosyltransferase 1) (MAT 1) | 396 |
| DGAT1 | Q8MK44 | Diacylglycerol O-acyltransferase 1 (EC 2.3.1.20) (Acyl-CoA retinol O-fatty-acyltransferase) (ARAT) (Retinol O-fatty-acyltransferase) (EC 2.3.1.76) (Diglyceride acyltransferase) | 489 |
| SCNN1G | F1MJW3 | Epithelial sodium channel subunit gamma (Amiloride-sensitive sodium channel subunit gamma) | 652 |
| CD3E | Q28073 | T-cell surface glycoprotein CD3 epsilon chain (CD antigen CD3e) | 192 |
| C1S | Q0VCX1 | Complement C1s subcomponent (EC 3.4.21.42) (C1 esterase) (Complement component 1 subcomponent s) [Cleaved into: Complement C1s subcomponent heavy chain; Complement C1s subcomponent light chain] | 689 |
| HSP90B1 | Q95M18 | Endoplasmin (EC 3.6.4.-) (94 kDa glucose-regulated protein) (GRP-94) (Heat shock protein 90 kDa beta member 1) | 804 |
| ADORA1 | P28190 | Adenosine receptor A1 | 326 |
| CNTN1 | Q28106 | Contactin-1 (Neural cell surface protein F3) | 1018 |
| EEF1A2 | Q32PH8 | Elongation factor 1-alpha 2 (EF-1-alpha-2) (EC 3.6.5.-) (Eukaryotic elongation factor 1 A-2) (eEF1A-2) | 463 |
| EIF4A1 | Q3SZ54 | Eukaryotic initiation factor 4A-I (eIF-4A-I) (eIF4A-I) (EC 3.6.4.13) (ATP-dependent RNA helicase eIF4A-1) | 406 |
| MAPKAPK3 | Q3SYZ2 | MAP kinase-activated protein kinase 3 (MAPK-activated protein kinase 3) (MAPKAP kinase 3) (MAPKAP-K3) (MAPKAPK-3) (MK-3) (EC 2.7.11.1) | 384 |
| SPRY2 | Q08E39 | Protein sprouty homolog 2 (Spry-2) | 315 |
| GNAI1 | P63097 | Guanine nucleotide-binding protein G(i) subunit alpha-1 (EC 3.6.5.-) (Adenylate cyclase-inhibiting G alpha protein) | 354 |
| SSTR2 | P34993 | Somatostatin receptor type 2 (SS-2-R) (SS2-R) (SS2R) (SRIF-1) | 368 |
| GABRB1 | P08220 | Gamma-aminobutyric acid receptor subunit beta-1 (GABA(A) receptor subunit beta-1) (GABAAR subunit beta-1) | 474 |
| GLRB | Q9GJS9 | Glycine receptor subunit beta (Glycine receptor 58 kDa subunit) | 497 |
| C1QA | Q5E9E3 | Complement C1q subcomponent subunit A | 244 |
| YWHAQ | Q3SZI4 | 14-3-3 protein theta | 245 |
| TNK2 | Q17R13 | Activated CDC42 kinase 1 (ACK-1) (EC 2.7.10.2) (EC 2.7.11.1) (Activated CDC42 kinase 2) (Tyrosine kinase non-receptor protein 2) | 1039 |
| ADORA2B | Q1LZD0 | Adenosine receptor A2b | 332 |
| NR1D1 | Q08E02 | Nuclear receptor subfamily 1 group D member 1 (Rev-erbA-alpha) (V-erbA-related protein 1) (EAR-1) | 613 |
| TPT1 | Q5E984 | Translationally-controlled tumor protein (TCTP) | 172 |
| YWHAB | P68250 | 14-3-3 protein beta/alpha (Protein kinase C inhibitor protein 1) (KCIP-1) [Cleaved into: 14-3-3 protein beta/alpha, N-terminally processed] | 246 |
| MAP2K6 | Q5E9X2 | Dual specificity mitogen-activated protein kinase kinase 6 (MAP kinase kinase 6) (MAPKK 6) (EC 2.7.12.2) (MAPK/ERK kinase 6) (MEK 6) | 334 |
| CASP4 | Q5E9C1 | Caspase-4 (CASP-4) (EC 3.4.22.57) [Cleaved into: Caspase-4 subunit p10; Caspase-4 subunit p20] | 377 |
| ARHGDIA | P19803 | Rho GDP-dissociation inhibitor 1 (Rho GDI 1) (Rho-GDI alpha) | 204 |
| TDO2 | Q2KIQ5 | Tryptophan 2,3-dioxygenase (TDO) (EC 1.13.11.11) (Tryptamin 2,3-dioxygenase) (Tryptophan oxygenase) (TO) (TRPO) (Tryptophan pyrrolase) (Tryptophanase) | 406 |
| IRAK1 | Q2LGB3 | Interleukin-1 receptor-associated kinase 1 (IRAK-1) (EC 2.7.11.1) | 718 |
| TBXAS1 | Q2KIG5 | Thromboxane-A synthase (TXA synthase) (TXS) (EC 5.3.99.5) (Cytochrome P450 5A1) (Hydroperoxy icosatetraenoate dehydratase) (EC 4.2.1.152) | 533 |
| PPP1CA | Q3T0E7 | Serine/threonine-protein phosphatase PP1-alpha catalytic subunit (PP-1A) (EC 3.1.3.16) | 330 |
| NOC2L | Q3SYU1 | Nucleolar complex protein 2 homolog (Protein NOC2 homolog) (NOC2-like protein) (Novel INHAT repressor) | 746 |
| PERM1 | A5D7L8 | PGC-1 and ERR-induced regulator in muscle protein 1 (PPARGC1 and ESRR-induced regulator in muscle 1) (Peroxisome proliferator-activated receptor gamma coactivator 1 and estrogen-related receptor-induced regulator in muscle 1) | 901 |
| ISG15 | O02741 | Ubiquitin-like protein ISG15 (Interferon-stimulated gene product 17) (Ubiquitin cross-reactive protein) (BoUCRP) | 154 |
| INTS11 | Q2YDM2 | Integrator complex subunit 11 (Int11) (EC 3.1.27.-) (Cleavage and polyadenylation-specific factor 3-like protein) (CPSF3-like protein) | 599 |
| CPTP | Q0VCQ0 | Ceramide-1-phosphate transfer protein (Glycolipid transfer protein domain-containing protein 1) (CPTP) | 214 |
| MXRA8 | Q148M6 | Matrix remodeling-associated protein 8 (Limitrin) | 463 |
| VWA1 | A6QLN9 | von Willebrand factor A domain-containing protein 1 | 413 |
| SSU72 | Q17QI2 | RNA polymerase II subunit A C-terminal domain phosphatase SSU72 (CTD phosphatase SSU72) (EC 3.1.3.16) | 194 |
| GNB1 | P62871 | Guanine nucleotide-binding protein G(I)/G(S)/G(T) subunit beta-1 (Transducin beta chain 1) | 340 |
| FAAP20 | A5PKK9 | Fanconi anemia core complex-associated protein 20 (FANCA-associated protein of 20 kDa) (Fanconi anemia-associated protein of 20 kDa) | 192 |
| RER1 | A5PJ65 | Protein RER1 | 196 |
| DFFB | Q58CZ0 | DNA fragmentation factor subunit beta (EC 3.-.-.-) | 341 |
| KCNAB2 | Q27955 | Voltage-gated potassium channel subunit beta-2 (EC 1.1.1.-) (K(+) channel subunit beta-2) (Kv-beta-2) | 367 |
| NOL9 | E1BPN0 | Polynucleotide 5'-hydroxyl-kinase NOL9 (EC 2.7.1.78) (Nucleolar protein 9) | 694 |
| CENPS | Q2TBR7 | Centromere protein S (CENP-S) (Apoptosis-inducing TAF9-like domain-containing protein 1 homolog) (FANCM-interacting histone fold protein 1) | 138 |
| ANGPTL7 | Q5EA66 | Angiopoietin-related protein 7 (Angiopoietin-like protein 7) | 344 |
| NPPA | P07501 | Natriuretic peptides A (Atrial natriuretic factor prohormone) (preproANF) (proANF) (Atrial natriuretic peptide prohormone) (preproANP) (proANP) (Atriopeptigen) (Cardiodilatin) (CDD) (preproCDD-ANF) [Cleaved into: Long-acting natriuretic peptide (LANP) (Long-acting natriuretic hormone) (LANH) (Pro atrial natriuretic factor 1-30) (proANF 1-30) (Pro atrial natriuretic peptide 1-30) (proANP 1-30); Vessel dilator (VSDL) (Pro atrial natriuretic factor 31-67) (proANF 31-67) (Pro atrial natriuretic peptide 31-67) (proANP 31-67); Kaliuretic peptide (KP) (Pro atrial natriuretic factor 79-98) (proANF 79-98) (Pro atrial natriuretic peptide 79-98) (proANP 79-98); Urodilatin (URO) (CDD 95-126) (CDD-ANP (95-126)) (Pro atrial natriuretic peptide 95-126) (proANP 95-126); Auriculin-C (Atrial natriuretic factor 1-33) (ANF 1-33); Auriculin-D (Atrial natriuretic factor 3-33) (ANF 3-33); Atrial natriuretic peptide (ANP) (Alpha-atrial natriuretic peptide) (Alpha-hANP) (Atrial natriuretic factor) (ANF) (CDD-ANF) (CDD-ANP (99-126)) (Cardionatrin) (Pro atrial natriuretic factor 99-126) (proANF 99-126); Auriculin-B (Atrial natriuretic factor 8-33) (ANF 8-33); Auriculin-A; Atriopeptin-1 (Atriopeptin I); Atriopeptin-2 (Atriopeptin II); Atriopeptin-3 (Atriopeptin III)] | 152 |
| PLOD1 | O77588 | Procollagen-lysine,2-oxoglutarate 5-dioxygenase 1 (EC 1.14.11.4) (Lysyl hydroxylase 1) (LH1) | 726 |
| DHRS3 | O77769 | Short-chain dehydrogenase/reductase 3 (EC 1.1.1.300) (Retinal short-chain dehydrogenase/reductase 1) (retSDR1) | 302 |
| EFHD2 | A5D7A0 | EF-hand domain-containing protein D2 (Swiprosin-1) | 242 |
| CTRC | Q7M3E1 | Chymotrypsin-C (EC 3.4.21.2) (bPTLP) | 268 |
| CELA2A | Q29461 | Chymotrypsin-like elastase family member 2A (EC 3.4.21.71) (Elastase II) (Elastase-2) (Elastase-2A) | 269 |
| FBLIM1 | Q1JQB5 | Filamin-binding LIM protein 1 (FBLP-1) | 378 |
| MFAP2 | P27424 | Microfibrillar-associated protein 2 (MFAP-2) (Microfibril-associated glycoprotein 1) (MAGP) (MAGP-1) (Tropoelastin-binding protein) | 183 |
| ALDH4A1 | A7YWE4 | Delta-1-pyrroline-5-carboxylate dehydrogenase, mitochondrial (P5C dehydrogenase) (EC 1.2.1.88) (Aldehyde dehydrogenase family 4 member A1) (L-glutamate gamma-semialdehyde dehydrogenase) | 563 |
| CAMK2N1 | A7MBG3 | Calcium/calmodulin-dependent protein kinase II inhibitor 1 | 78 |
| DDOST | A6QPY0 | Dolichyl-diphosphooligosaccharide--protein glycosyltransferase 48 kDa subunit (DDOST 48 kDa subunit) (Oligosaccharyl transferase 48 kDa subunit) | 439 |
| C1QB | Q2KIV9 | Complement C1q subcomponent subunit B | 247 |
| ID3 | Q5E981 | DNA-binding protein inhibitor ID-3 (Inhibitor of DNA binding 3) (Inhibitor of differentiation 3) | 119 |
| GALE | Q3T105 | UDP-glucose 4-epimerase (EC 5.1.3.2) (Galactowaldenase) (UDP-N-acetylglucosamine 4-epimerase) (UDP-GlcNAc 4-epimerase) (EC 5.1.3.7) (UDP-galactosamine 4-epimerase) (UDP-GalNAc 4-epimerase) (UDP-galactose 4-epimerase) | 348 |
| HMGCL | Q29448 | Hydroxymethylglutaryl-CoA lyase, mitochondrial (HL) (HMG-CoA lyase) (EC 4.1.3.4) (3-hydroxy-3-methylglutarate-CoA lyase) | 325 |
| PNRC2 | Q0VCW6 | Proline-rich nuclear receptor coactivator 2 | 139 |
| STPG1 | A6QQ60 | O(6)-methylguanine-induced apoptosis 2 (MAPO2) (Sperm-tail PG-rich repeat-containing protein 1) | 335 |
| CLIC4 | Q9XSA7 | Chloride intracellular channel protein 4 (Glutaredoxin-like oxidoreductase CLIC4) (EC 1.8.-.-) (Intracellular chloride ion channel protein p64H1) | 253 |
| MTFR1L | Q3ZBW7 | Mitochondrial fission regulator 1-like | 289 |
| AUNIP | A4IFU8 | Aurora kinase A- and ninein-interacting protein | 357 |
| STMN1 | Q3T0C7 | Stathmin | 149 |
| SH3BGRL3 | Q3ZCL8 | SH3 domain-binding glutamic acid-rich-like protein 3 | 93 |
| SFN | Q0VC36 | 14-3-3 protein sigma (Stratifin) | 248 |
| TENT5B | Q29RH2 | Terminal nucleotidyltransferase 5B (EC 2.7.7.19) (Non-canonical poly(A) polymerase FAM46B) | 430 |
| WASF2 | A2VDK6 | Actin-binding protein WASF2 (Wiskott-Aldrich syndrome protein family member 2) (WASP family protein member 2) | 493 |
| PTAFR | Q9TTY5 | Platelet-activating factor receptor (PAF-R) (PAFr) | 342 |
| TRNAU1AP | Q1RMJ7 | tRNA selenocysteine 1-associated protein 1 (tRNA selenocysteine-associated protein 1) | 287 |
| GMEB1 | Q2HJ87 | Glucocorticoid modulatory element-binding protein 1 (GMEB-1) | 563 |
| YTHDF2 | Q0VCZ3 | YTH domain-containing family protein 2 | 580 |
| EPB41 | Q9N179 | Protein 4.1 (P4.1) (4.1R) (Band 4.1) (Erythrocyte membrane protein band 4.1) | 617 |
| MECR | Q7YS70 | Enoyl-[acyl-carrier-protein] reductase, mitochondrial (EC 1.3.1.104) (2-enoyl thioester reductase) (Nuclear receptor-binding factor 1) (BtNrbf-1) (NRBF-1) | 373 |
| LAPTM5 | Q2KJA5 | Lysosomal-associated transmembrane protein 5 (Lysosomal-associated multitransmembrane protein 5) | 264 |
| FABP3 | P10790 | Fatty acid-binding protein, heart (Fatty acid-binding protein 3) (Heart-type fatty acid-binding protein) (H-FABP) (Mammary-derived growth inhibitor) (MDGI) | 133 |
| YARS1 | Q29465 | Tyrosine--tRNA ligase, cytoplasmic (EC 6.1.1.1) (Tyrosyl-tRNA synthetase) (TyrRS) [Cleaved into: Tyrosine--tRNA ligase, cytoplasmic, N-terminally processed] | 528 |
| AK2 | P08166 | Adenylate kinase 2, mitochondrial (AK 2) (EC 2.7.4.3) (ATP-AMP transphosphorylase 2) (ATP:AMP phosphotransferase) (Adenylate monophosphate kinase) [Cleaved into: Adenylate kinase 2, mitochondrial, N-terminally processed] | 241 |
| HMGB4 | Q32L34 | High mobility group protein B4 | 194 |
| GJB3 | Q58D78 | Gap junction beta-3 protein (Connexin-31) (Cx31) | 270 |
| GJA4 | A4IFL1 | Gap junction alpha-4 protein (Connexin-37) (Cx37) | 333 |
| NCDN | Q2KJ97 | Neurochondrin | 729 |
| TEKT2 | Q2T9Q6 | Tektin-2 | 430 |
| ADPRS | Q3SYV9 | ADP-ribosylhydrolase ARH3 (ADP-ribose glycohydrolase ARH3) (ADP-ribosylhydrolase 3) (O-acetyl-ADP-ribose deacetylase ARH3) (EC 3.5.1.-) (Poly(ADP-ribose) glycohydrolase ARH3) (EC 3.2.1.143) ([Protein ADP-ribosylarginine] hydrolase-like protein 2) ([Protein ADP-ribosylserine] hydrolase) (EC 3.2.2.-) | 365 |
| ZC3H12A | A6QQJ8 | Ribonuclease ZC3H12A (EC 3.1.-.-) (Zinc finger CCCH domain-containing protein 12A) | 583 |
| YRDC | Q0VC80 | Threonylcarbamoyl-AMP synthase (EC 2.7.7.87) | 276 |
| HEYL | Q2NL18 | Hairy/enhancer-of-split related with YRPW motif-like protein | 328 |
| HPCAL4 | P29104 | Hippocalcin-like protein 4 (Neurocalcin-beta) | 191 |
| COL9A2 | C0HLN2 | Collagen alpha-2(IX) chain (Collagen type IX alpha 2 chain) | 688 |
| ZFP69 | A7MBI1 | Zinc finger protein 69 homolog (Zinc finger protein 642) | 524 |
| EXO5 | A2VDX7 | Exonuclease V (Exo V) (EC 3.1.-.-) (Defects in morphology protein 1 homolog) | 370 |
| YBX1 | P67808 | Y-box-binding protein 1 (YB-1) (DNA-binding protein B) (DBPB) (Enhancer factor I subunit A) (EFI-A) (Y-box transcription factor) | 324 |
| SVBP | Q32LJ0 | Small vasohibin-binding protein (Coiled coil domain-containing protein 23) | 66 |
| TIE1 | Q06805 | Tyrosine-protein kinase receptor Tie-1 (EC 2.7.10.1) | 1136 |
| DPH2 | Q08DM2 | 2-(3-amino-3-carboxypropyl)histidine synthase subunit 2 (Diphthamide biosynthesis protein 2) (Diphtheria toxin resistance protein 2) (S-adenosyl-L-methionine:L-histidine 3-amino-3-carboxypropyltransferase 2) | 489 |
| RNF220 | Q08DV5 | E3 ubiquitin-protein ligase RNF220 (EC 2.3.2.27) (RING finger protein 220) (RING-type E3 ubiquitin transferase RNF220) | 566 |
| TMEM53 | Q2TBP5 | Transmembrane protein 53 | 294 |
| EIF2B3 | A5PJI7 | Translation initiation factor eIF2B subunit gamma (eIF2B GDP-GTP exchange factor subunit gamma) | 452 |
| TOE1 | Q17QN2 | Target of EGR1 protein 1 | 524 |
| MMACHC | Q5E9C8 | Cyanocobalamin reductase / alkylcobalamin dealkylase (Alkylcobalamin:glutathione S-alkyltransferase) (EC 2.5.1.151) (CblC) (Cyanocobalamin reductase (cyanide-eliminating)) (EC 1.16.1.6) (Methylmalonic aciduria and homocystinuria type C protein) (MMACHC) | 280 |
| NASP | Q2T9P4 | Nuclear autoantigenic sperm protein (NASP) | 777 |
| POMGNT1 | Q5EAB6 | Protein O-linked-mannose beta-1,2-N-acetylglucosaminyltransferase 1 (POMGnT1) (EC 2.4.1.-) | 660 |
| UQCRH | P00126 | Cytochrome b-c1 complex subunit 6, mitochondrial (Complex III subunit 6) (Complex III subunit VIII) (Cytochrome c1 non-heme 11 kDa protein) (Mitochondrial hinge protein) (Ubiquinol-cytochrome c reductase complex 11 kDa protein) | 91 |
| NSUN4 | Q0V8R7 | 5-cytosine rRNA methyltransferase NSUN4 (EC 2.1.1.-) (5-cytosine tRNA methyltransferase NSUN4) (EC 2.1.1.-) (NOL1/NOP2/Sun domain family member 4) | 384 |
| PDZK1IP1 | Q2KIP5 | PDZK1-interacting protein 1 | 114 |
| CMPK1 | Q2KIW9 | UMP-CMP kinase (EC 2.7.4.14) (Deoxycytidylate kinase) (CK) (dCMP kinase) (Nucleoside-diphosphate kinase) (EC 2.7.4.6) (Uridine monophosphate/cytidine monophosphate kinase) (UMP/CMP kinase) (UMP/CMPK) | 196 |
| SPATA6 | Q2KJG1 | Spermatogenesis-associated protein 6 | 487 |
| DMRTA2 | A6QQ94 | Doublesex- and mab-3-related transcription factor A2 (Doublesex- and mab-3-related transcription factor 5) | 535 |
| TXNDC12 | Q5E936 | Thioredoxin domain-containing protein 12 (EC 1.8.4.2) | 172 |
| ORC1 | Q58DC8 | Origin recognition complex subunit 1 | 863 |
| GPX7 | A6QLY2 | Glutathione peroxidase 7 (GPx-7) (GSHPx-7) (EC 1.11.1.9) | 186 |
| SCP2 | P07857 | Sterol carrier protein 2 (SCP-2) (Acetyl-CoA C-myristoyltransferase) (EC 2.3.1.155) (Non-specific lipid-transfer protein) (NSL-TP) (Propanoyl-CoA C-acyltransferase) (EC 2.3.1.176) (SCP-2/3-oxoacyl-CoA thiolase) (SCP-2/thiolase) (EC 2.3.1.16) (SCP-chi) (SCPX) (Sterol carrier protein X) (SCP-X) | 543 |
| LRRC42 | Q2HJ90 | Leucine-rich repeat-containing protein 42 | 428 |
| OMA1 | Q3SZN3 | Metalloendopeptidase OMA1, mitochondrial (EC 3.4.24.-) (Overlapping with the m-AAA protease 1 homolog) | 523 |
| USP1 | Q29RP1 | Ubiquitin carboxyl-terminal hydrolase 1 (EC 3.4.19.12) (Deubiquitinating enzyme 1) (Ubiquitin thioesterase 1) (Ubiquitin-specific-processing protease 1) [Cleaved into: Ubiquitin carboxyl-terminal hydrolase 1, N-terminal fragment] | 783 |
| DNAJC6 | Q27974 | Auxilin (EC 3.1.3.-) (DnaJ homolog subfamily C member 6) | 910 |
| LEPROT | Q3SYT0 | Leptin receptor gene-related protein (Endospanin-1) (OB-R gene-related protein) (OB-RGRP) | 131 |
| IL12RB2 | Q9BEG2 | Interleukin-12 receptor subunit beta-2 (IL-12 receptor subunit beta-2) (IL-12R subunit beta-2) (IL-12R-beta-2) (IL-12RB2) | 861 |
| GADD45A | Q3ZBN6 | Growth arrest and DNA damage-inducible protein GADD45 alpha | 165 |
| RPE65 | Q28175 | Retinoid isomerohydrolase (EC 3.1.1.64) (All-trans-retinyl-palmitate hydrolase) (Lutein isomerase) (Meso-zeaxanthin isomerase) (EC 5.3.3.22) (Retinal pigment epithelium-specific 65 kDa protein) (Retinol isomerase) | 533 |
| LRRC7 | F1MCA7 | Leucine-rich repeat-containing protein 7 (Densin-180) (Densin) | 1536 |
| PTGER3 | P34979 | Prostaglandin E2 receptor EP3 subtype (PGE receptor EP3 subtype) (PGE2 receptor EP3 subtype) (Prostanoid EP3 receptor) | 417 |
| CRYZ | O97764 | Zeta-crystallin | 330 |
| ACADM | Q3SZB4 | Medium-chain specific acyl-CoA dehydrogenase, mitochondrial (MCAD) (EC 1.3.8.7) | 421 |
| ASB17 | Q32KY8 | Ankyrin repeat and SOCS box protein 17 (ASB-17) | 295 |
| PIGK | Q3MHZ7 | GPI-anchor transamidase (EC 2.6.1.-) (GPI-anchor transamidase component PIGK) (Phosphatidylinositol-glycan biosynthesis class K protein) (PIG-K) | 395 |
| USP33 | A6QNM7 | Ubiquitin carboxyl-terminal hydrolase 33 (EC 3.4.19.12) (Deubiquitinating enzyme 33) (Ubiquitin thioesterase 33) (Ubiquitin-specific-processing protease 33) | 912 |
| DNAJB4 | Q2KIT4 | DnaJ homolog subfamily B member 4 | 337 |
| PTGFR | P37289 | Prostaglandin F2-alpha receptor (PGF receptor) (PGF2-alpha receptor) (Prostanoid FP receptor) | 362 |
| UOX | Q3MHG7 | Uricase (EC 1.7.3.3) (Urate oxidase) | 304 |
| DDAH1 | P56965 | N(G),N(G)-dimethylarginine dimethylaminohydrolase 1 (DDAH-1) (Dimethylarginine dimethylaminohydrolase 1) (EC 3.5.3.18) (DDAHI) (Dimethylargininase-1) | 285 |
| SH3GLB1 | Q32LM0 | Endophilin-B1 (SH3 domain-containing GRB2-like protein B1) | 365 |
| SELENOF | A8YXY3 | Selenoprotein F | 162 |
| LMO4 | Q3SWZ8 | LIM domain transcription factor LMO4 (LIM domain only protein 4) (LMO-4) | 165 |
| KYAT3 | Q0P5G4 | Kynurenine--oxoglutarate transaminase 3 (EC 2.6.1.7) (Cysteine-S-conjugate beta-lyase 2) (EC 4.4.1.13) (Kynurenine aminotransferase 3) (Kynurenine aminotransferase III) (KATIII) (Kynurenine--glyoxylate transaminase) (EC 2.6.1.63) (Kynurenine--oxoglutarate transaminase III) | 455 |
| DNTTIP2 | Q0P5H2 | Deoxynucleotidyltransferase terminal-interacting protein 2 | 766 |
| GCLM | Q2T9Y6 | Glutamate--cysteine ligase regulatory subunit (GCS light chain) (Gamma-ECS regulatory subunit) (Gamma-glutamylcysteine synthetase regulatory subunit) (Glutamate--cysteine ligase modifier subunit) | 274 |
| ABCA4 | F1MWM0 | Retinal-specific phospholipid-transporting ATPase ABCA4 (EC 7.6.2.1) (ATP-binding cassette sub-family A member 4) (RIM ABC transporter) (RIM protein) (RmP) (Retinal-specific ATP-binding cassette transporter) | 2281 |
| ARHGAP29 | A7YY57 | Rho GTPase-activating protein 29 (Rho-type GTPase-activating protein 29) | 1269 |
| F3 | P30931 | Tissue factor (TF) (Coagulation factor III) (CD antigen CD142) | 292 |
| RWDD3 | A3KN24 | RWD domain-containing protein 3 | 267 |
| PALMD | Q3MHH7 | Palmdelphin | 550 |
| FRRS1 | A2VE04 | Ferric-chelate reductase 1 (EC 1.-.-.-) | 591 |
| SLC35A3 | Q6YC49 | UDP-N-acetylglucosamine transporter (Golgi UDP-GlcNAc transporter) (Solute carrier family 35 member A3) | 326 |
| DBT | P11181 | Lipoamide acyltransferase component of branched-chain alpha-keto acid dehydrogenase complex, mitochondrial (EC 2.3.1.168) (Branched-chain alpha-keto acid dehydrogenase complex component E2) (BCKAD-E2) (BCKADE2) (Dihydrolipoamide acetyltransferase component of branched-chain alpha-keto acid dehydrogenase complex) (Dihydrolipoamide branched chain transacylase) (Dihydrolipoyllysine-residue (2-methylpropanoyl)transferase) | 482 |
| SLC30A7 | A4IFD7 | Zinc transporter 7 (Solute carrier family 30 member 7) | 376 |
| DPH5 | Q5E982 | Diphthine methyl ester synthase (EC 2.1.1.314) (Diphthamide biosynthesis methyltransferase) | 285 |
| S1PR1 | Q5E9P3 | Sphingosine 1-phosphate receptor 1 (S1P receptor 1) (S1P1) (Endothelial differentiation G-protein coupled receptor 1) (Sphingosine 1-phosphate receptor Edg-1) (S1P receptor Edg-1) (CD antigen CD363) | 382 |
| COL11A1 | Q28083 | Collagen alpha-1(XI) chain | 911 |
| RNPC3 | Q3MHP0 | RNA-binding region-containing protein 3 (RNA-binding motif protein 40) (RNA-binding protein 40) | 516 |
| SLC25A24 | A5PJZ1 | Mitochondrial adenyl nucleotide antiporter SLC25A24 (Small calcium-binding mitochondrial carrier protein 1) (SCaMC-1) (Solute carrier family 25 member 24) | 477 |
| CLCC1 | Q1LZF8 | Chloride channel CLIC-like protein 1 (ER anion channel 1) (ERAC1) | 542 |
| TAF13 | Q148M7 | Transcription initiation factor TFIID subunit 13 (Transcription initiation factor TFIID 18 kDa subunit) (TAF(II)18) (TAFII-18) (TAFII18) | 124 |
| CFAP276 | E1B9I5 | Cilia- and flagella-associated protein 276 | 170 |
| SARS1 | Q9GMB8 | Serine--tRNA ligase, cytoplasmic (EC 6.1.1.11) (Seryl-tRNA synthetase) (SerRS) (Seryl-tRNA(Ser/Sec) synthetase) | 514 |
| PSRC1 | Q29RJ9 | Proline/serine-rich coiled-coil protein 1 | 326 |
| GSTM1 | Q9N0V4 | Glutathione S-transferase Mu 1 (EC 2.5.1.18) (GST class-mu 1) (GSTM1-1) | 218 |
| STRIP1 | Q0P5J8 | Striatin-interacting protein 1 (Protein FAM40A) | 837 |
| SLC6A17 | Q28001 | Sodium-dependent neutral amino acid transporter SLC6A17 (Sodium-dependent neurotransmitter transporter NTT4) (Solute carrier family 6 member 17) | 225 |
| LAMTOR5 | Q3SZ68 | Ragulator complex protein LAMTOR5 (Late endosomal/lysosomal adaptor and MAPK and MTOR activator 5) | 91 |
| DRAM2 | Q3ZC48 | DNA damage-regulated autophagy modulator protein 2 (Transmembrane protein 77) | 266 |
| CHIA | Q95M17 | Acidic mammalian chitinase (AMCase) (EC 3.2.1.14) (Chitin-binding protein b04) (CBPb04) | 472 |
| CIMAP3 | Q2TBS4 | Ciliary microtubule-associated protein 3 (Protein pitchfork) | 192 |
| WDR77 | Q5E9I7 | Methylosome protein WDR77 (Methylosome protein 50) (MEP-50) (WD repeat-containing protein 77) | 342 |
| ADORA3 | Q0VC81 | Adenosine receptor A3 | 317 |
| RAP1A | P62833 | Ras-related protein Rap-1A (EC 3.6.5.2) (GTP-binding protein smg p21A) | 184 |
| INKA2 | A6QP24 | PAK4-inhibitor INKA2 | 294 |
| BCL2L15 | Q0II48 | Bcl-2-like protein 15 (Bcl2-L-15) | 162 |
| TSHB | P01223 | Thyrotropin subunit beta (Thyroid-stimulating hormone subunit beta) (TSH-B) (TSH-beta) (Thyrotropin beta chain) | 138 |
| TRIM45 | Q5BIM1 | E3 ubiquitin-protein ligase TRIM45 (EC 2.3.2.27) (RING finger protein 99) (Tripartite motif-containing protein 45) | 580 |
| GDAP2 | Q2KIX2 | Ganglioside-induced differentiation-associated protein 2 | 497 |
| WARS2 | Q3T099 | Tryptophan--tRNA ligase, mitochondrial (EC 6.1.1.2) ((Mt)TrpRS) (Tryptophanyl-tRNA synthetase) (TrpRS) | 360 |
| HMGCS2 | Q2KIE6 | Hydroxymethylglutaryl-CoA synthase, mitochondrial (HMG-CoA synthase) (EC 2.3.3.10) (3-hydroxy-3-methylglutaryl coenzyme A synthase) | 508 |
| PDZK1 | Q3T0X8 | Na(+)/H(+) exchange regulatory cofactor NHE-RF3 (NHERF-3) (Na(+)/H(+) exchanger regulatory factor 3) (PDZ domain-containing protein 1) (Sodium-hydrogen exchanger regulatory factor 3) | 520 |
| PEX11B | Q148K5 | Peroxisomal membrane protein 11B (Peroxin-11B) (Peroxisomal biogenesis factor 11B) | 258 |
| RBM8A | Q3ZCE8 | RNA-binding protein 8A (RNA-binding motif protein 8A) | 174 |
| POLR3GL | Q1RMR0 | DNA-directed RNA polymerase III subunit RPC7-like (RNA polymerase III subunit C7-like) (DNA-directed RNA polymerase III subunit G-like) | 218 |
| CHD1L | Q3B7N1 | Chromodomain-helicase-DNA-binding protein 1-like (EC 3.6.4.-) | 897 |
| ACP6 | A6H757 | Lysophosphatidic acid phosphatase type 6 (EC 3.1.3.2) | 429 |
| GJA5 | Q0VCR2 | Gap junction alpha-5 protein (Connexin-40) (Cx40) | 359 |
| SV2A | Q29397 | Synaptic vesicle glycoprotein 2A (p87) | 742 |
| PRPF3 | Q2KIA6 | U4/U6 small nuclear ribonucleoprotein Prp3 (Pre-mRNA-splicing factor 3) | 683 |
| HORMAD1 | Q2KIY6 | HORMA domain-containing protein 1 | 393 |
| CTSS | P25326 | Cathepsin S (EC 3.4.22.27) | 331 |
| ARNT | Q9BE97 | Aryl hydrocarbon receptor nuclear translocator (ARNT protein) | 790 |
| CERS2 | Q3ZBF8 | Ceramide synthase 2 (CerS2) (LAG1 longevity assurance homolog 2) (Sphingosine N-acyltransferase CERS2) (EC 2.3.1.24) (Tumor metastasis-suppressor gene 1 protein) (Very-long-chain ceramide synthase CERS2) (EC 2.3.1.297) | 380 |
| PRUNE1 | Q5E9Y6 | Exopolyphosphatase PRUNE1 (EC 3.6.1.1) | 453 |
| CDC42SE1 | Q5BIS3 | CDC42 small effector protein 1 | 79 |
| TNFAIP8L2 | Q3ZBK5 | Tumor necrosis factor alpha-induced protein 8-like protein 2 (TIPE2) (TNF alpha-induced protein 8-like protein 2) (TNFAIP8-like protein 2) | 184 |
| SCNM1 | Q3ZBR0 | Sodium channel modifier 1 | 230 |
| PI4KB | O02810 | Phosphatidylinositol 4-kinase beta (PI4K-beta) (PI4Kbeta) (PtdIns 4-kinase beta) (EC 2.7.1.67) | 816 |
| SELENBP1 | Q2KJ32 | Methanethiol oxidase (MTO) (EC 1.8.3.4) (56 kDa selenium-binding protein) (SBP56) (SP56) (Selenium-binding protein 1) | 472 |
| PSMB4 | Q3T108 | Proteasome subunit beta type-4 | 264 |
| TUFT1 | P27628 | Tuftelin (Enamelin) | 390 |
| SNX27 | A5PKA5 | Sorting nexin-27 | 541 |
| CELF3 | Q08E07 | CUGBP Elav-like family member 3 (CELF-3) (Bruno-like protein 1) (CUG-BP- and ETR-3-like factor 3) (ELAV-type RNA-binding protein 1) (ETR-1) (RNA-binding protein BRUNOL-1) (Trinucleotide repeat-containing gene 4 protein) | 461 |
| S100A10 | P60902 | Protein S100-A10 (Calpactin I light chain) (Calpactin-1 light chain) (Cellular ligand of annexin II) (S100 calcium-binding protein A10) (p10 protein) (p11) | 97 |
| S100A9 | P28783 | Protein S100-A9 (BEE22) (Calgranulin-B) (Neutrophil cytosolic 23 kDa protein) (p23) (S100 calcium-binding protein A9) | 156 |
| S100A8 | P28782 | Protein S100-A8 (BEE11) (Calgranulin-A) (Neutrophil cytosolic 7 kDa protein) (P7) (S100 calcium-binding protein A8) | 89 |
| S100A14 | Q3MHP3 | Protein S100-A14 (S100 calcium-binding protein A14) | 104 |
| S100A1 | P02639 | Protein S100-A1 (S-100 protein alpha chain) (S-100 protein subunit alpha) (S100 calcium-binding protein A1) | 94 |
| CHTOP | Q3SYW9 | Chromatin target of PRMT1 protein (Friend of PRMT1 protein) (Small arginine- and glycine-rich protein) (SRAG) | 248 |
| CRTC2 | Q08E26 | CREB-regulated transcription coactivator 2 (Transducer of regulated cAMP response element-binding protein 2) (TORC-2) (Transducer of CREB protein 2) | 693 |
| RPS27 | Q2KHT7 | Small ribosomal subunit protein eS27 (40S ribosomal protein S27) | 84 |
| HAX1 | Q2KIE2 | HCLS1-associated protein X-1 (HS1-associating protein X-1) (HAX-1) | 279 |
| PMVK | Q2KIU2 | Phosphomevalonate kinase (PMKase) (EC 2.7.4.2) | 192 |
| CKS1B | Q0P5A5 | Cyclin-dependent kinases regulatory subunit 1 (CKS-1) | 79 |
| DPM3 | Q3ZC71 | Dolichol-phosphate mannosyltransferase subunit 3 (Dolichol-phosphate mannose synthase subunit 3) (DPM synthase subunit 3) (Dolichyl-phosphate beta-D-mannosyltransferase subunit 3) (Mannose-P-dolichol synthase subunit 3) (MPD synthase subunit 3) | 92 |
| MTX1 | Q2TBS1 | Metaxin-1 (Mitochondrial outer membrane import complex protein 1) | 317 |
| FDPS | Q8WMY2 | Farnesyl pyrophosphate synthase (FPP synthase) (FPS) (EC 2.5.1.10) ((2E,6E)-farnesyl diphosphate synthase) (Dimethylallyltranstransferase) (EC 2.5.1.1) (Farnesyl diphosphate synthase) (Geranyltranstransferase) | 353 |
| MSTO1 | A5D9D4 | Protein misato homolog 1 | 572 |
| DAP3 | P82922 | Small ribosomal subunit protein mS29 (EC 3.6.5.-) (28S ribosomal protein S29, mitochondrial) (MRP-S29) (S29mt) (Death-associated protein 3) (DAP-3) | 397 |
| LAMTOR2 | Q3T132 | Ragulator complex protein LAMTOR2 (Late endosomal/lysosomal adaptor and MAPK and MTOR activator 2) | 125 |
| RAB25 | Q58DW6 | Ras-related protein Rab-25 (EC 3.6.5.2) | 213 |
| SEMA4A | Q5EA85 | Semaphorin-4A | 762 |
| PMF1 | Q2T9N4 | Polyamine-modulated factor 1 (PMF-1) | 205 |
| BGLAP | P02820 | Osteocalcin (Bone Gla protein) (BGP) (Gamma-carboxyglutamic acid-containing protein) | 100 |
| TMEM79 | Q5E9U3 | Transmembrane protein 79 (Mattrin) | 395 |
| GLMP | Q0P5L7 | Glycosylated lysosomal membrane protein (Lysosomal protein NCU-G1) | 404 |
| CCT3 | Q3T0K2 | T-complex protein 1 subunit gamma (TCP-1-gamma) (EC 3.6.1.-) (CCT-gamma) | 545 |
| NAXE | Q6QRN6 | NAD(P)H-hydrate epimerase (EC 5.1.99.6) (Apolipoprotein A-I-binding protein) (AI-BP) (NAD(P)HX epimerase) | 288 |
| BCAN | Q28062 | Brevican core protein | 912 |
| MRPL24 | Q3SYS0 | Large ribosomal subunit protein uL24m (39S ribosomal protein L24, mitochondrial) (L24mt) (MRP-L24) | 216 |
| ACKR1 | Q9GLX0 | Atypical chemokine receptor 1 (Duffy antigen/chemokine receptor) (CD antigen CD234) | 330 |
| CFAP45 | Q32LN4 | Cilia- and flagella-associated protein 45 | 549 |
| PIGM | Q5EA10 | GPI alpha-1,4-mannosyltransferase I, catalytic subunit (EC 2.4.1.-) (GPI mannosyltransferase I) (GPI-MT-I) (Phosphatidylinositol-glycan biosynthesis class M protein) (PIG-M) | 423 |
| PEX19 | Q3SZD1 | Peroxisomal biogenesis factor 19 (Peroxin-19) (Peroxisomal farnesylated protein) | 299 |
| COPA | Q27954 | Coatomer subunit alpha (Alpha-coat protein) (Alpha-COP) (HEP-COP) (HEPCOP) [Cleaved into: Xenin (Xenopsin-related peptide); Proxenin] | 1224 |
| USF1 | Q6XBT4 | Upstream stimulatory factor 1 | 310 |
| NECTIN4 | Q5E9Z9 | Nectin-4 (Nectin cell adhesion molecule 4) (Poliovirus receptor-related protein 4) | 510 |
| NIT1 | Q32LH4 | Deaminated glutathione amidase (dGSH amidase) (EC 3.5.1.128) (Nitrilase homolog 1) | 328 |
| UFC1 | Q5E953 | Ubiquitin-fold modifier-conjugating enzyme 1 (Ufm1-conjugating enzyme 1) | 167 |
| PPOX | P56602 | Protoporphyrinogen oxidase (PPO) (EC 1.3.3.4) | 477 |
| PPOX | P56717 | Hypocretin neuropeptide precursor (Hypocretin) (Hcrt) (Orexin precursor) (Prepro-orexin) (Preprohypocretin) [Cleaved into: Orexin-A (Hypocretin-1) (Hcrt1); Orexin-B (Hypocretin-2) (Hcrt2)] | 131 |
| NDUFS2 | P17694 | NADH dehydrogenase [ubiquinone] iron-sulfur protein 2, mitochondrial (EC 7.1.1.2) (Complex I-49kD) (CI-49kD) (NADH-ubiquinone oxidoreductase 49 kDa subunit) | 463 |
| FCER1G | Q9BDR7 | High affinity immunoglobulin epsilon receptor subunit gamma (Fc receptor gamma-chain) (FcRgamma) (Fc-epsilon RI-gamma) (IgE Fc receptor subunit gamma) (FceRI gamma) | 85 |
| APOA2 | P81644 | Apolipoprotein A-II (Apo-AII) (ApoA-II) (Antimicrobial peptide BAMP-1) (Apolipoprotein A2) [Cleaved into: Proapolipoprotein A-II (ProapoA-II); Truncated apolipoprotein A-II (Apolipoprotein A-II(1-76))] | 100 |
| MPZ | P10522 | Myelin protein P0 (Myelin peripheral protein) (MPP) (Myelin protein zero) | 248 |
| SDHC | P35720 | Succinate dehydrogenase cytochrome b560 subunit, mitochondrial (Integral membrane protein CII-3) (Malate dehydrogenase [quinone] cytochrome b560 subunit) (QPs-1) (QPs1) (Succinate dehydrogenase complex subunit C) | 169 |
| SPATA46 | Q2YDE2 | Spermatogenesis-associated protein 46 | 247 |
| RGS5 | Q3T0T8 | Regulator of G-protein signaling 5 (RGS5) | 181 |
| TMCO1 | Q3T0N3 | Calcium load-activated calcium channel (CLAC channel) (GEL complex subunit TMCO1) (Transmembrane and coiled-coil domain-containing protein 1) | 188 |
| MAEL | Q32KV2 | Protein maelstrom homolog | 420 |
| MPZL1 | Q32PI9 | Myelin protein zero-like protein 1 | 269 |
| GPR161 | Q2YDN1 | G protein-coupled receptor 161 | 528 |
| DPT | P19427 | Dermatopontin (22 kDa extracellular matrix protein) (Dermatan sulfate proteoglycan-associated protein 22K) (Tyrosine-rich acidic matrix protein) (TRAMP) | 201 |
| NME7 | Q5E9Y9 | Nucleoside diphosphate kinase homolog 7 (NDK 7) (NDP kinase homolog 7) (3'-5' exonuclease NME7) (EC 3.1.-.-) (Protein kinase NME7) (EC 2.7.-.-) (nm23-H7) | 377 |
| SELP | P42201 | P-selectin (CD62 antigen-like family member P) (Granule membrane protein 140) (GMP-140) (Leukocyte-endothelial cell adhesion molecule 3) (LECAM3) (Platelet activation dependent granule-external membrane protein) (PADGEM) (CD antigen CD62P) | 646 |
| SELE | P98107 | E-selectin (CD62 antigen-like family member E) (Endothelial leukocyte adhesion molecule 1) (ELAM-1) (Leukocyte-endothelial cell adhesion molecule 2) (LECAM2) (CD antigen CD62E) | 485 |
| GORAB | A5PKK7 | RAB6-interacting golgin (N-terminal kinase-like-binding protein 1) (NTKL-BP1) (NTKL-binding protein 1) (SCY1-like 1-binding protein 1) (SCYL1-BP1) (SCYL1-binding protein 1) | 370 |
| FMO3 | Q8HYJ9 | Flavin-containing monooxygenase 3 (EC 1.14.13.148) (EC 1.14.13.32) (EC 1.14.13.8) (Dimethylaniline monooxygenase [N-oxide-forming] 3) (Dimethylaniline oxidase 3) (Hepatic flavin-containing monooxygenase 3) (FMO 3) (Trimethylamine monooxygenase) | 532 |
| MYOC | Q9XTA3 | Myocilin (Myocilin 55 kDa subunit) (Trabecular meshwork-induced glucocorticoid response protein) [Cleaved into: Myocilin, N-terminal fragment (Myocilin 20 kDa N-terminal fragment); Myocilin, C-terminal fragment (Myocilin 35 kDa N-terminal fragment)] | 490 |
| PIGC | Q3ZBX1 | Phosphatidylinositol N-acetylglucosaminyltransferase subunit C (Phosphatidylinositol-glycan biosynthesis class C protein) (PIG-C) | 297 |
| KLHL20 | Q08DK3 | Kelch-like protein 20 | 609 |
| DARS2 | A6QPU5 | Aspartate--tRNA ligase, mitochondrial (EC 6.1.1.12) (Aspartyl-tRNA synthetase) (AspRS) | 651 |
| MRPS14 | Q6B860 | Small ribosomal subunit protein uS14m (28S ribosomal protein S14, mitochondrial) (MRP-S14) (S14mt) | 128 |
| TDRD5 | E1BPH3 | Tudor domain-containing protein 5 | 975 |
| TOR1AIP1 | F1N4E5 | Torsin-1A-interacting protein 1 (Lamin-associated protein 1B) (LAP1B) | 600 |
| ACBD6 | A2VDR2 | Acyl-CoA-binding domain-containing protein 6 | 282 |
| DHX9 | Q28141 | ATP-dependent RNA helicase A (EC 3.6.4.13) (DEAH box protein 9) (Nuclear DNA helicase II) (NDH II) | 1287 |
| NMNAT2 | Q0VC59 | Nicotinamide/nicotinic acid mononucleotide adenylyltransferase 2 (NMN/NaMN adenylyltransferase 2) (EC 2.7.7.1) (EC 2.7.7.18) (Nicotinamide mononucleotide adenylyltransferase 2) (NMN adenylyltransferase 2) (Nicotinate-nucleotide adenylyltransferase 2) (NaMN adenylyltransferase 2) | 307 |
| NCF2 | O77775 | Neutrophil cytosol factor 2 (NCF-2) (67 kDa neutrophil oxidase factor) (Neutrophil NADPH oxidase factor 2) (p67-phox) | 527 |
| ARPC5 | Q3SYX9 | Actin-related protein 2/3 complex subunit 5 (Arp2/3 complex 16 kDa subunit) (p16-ARC) | 151 |
| PRG4 | Q29RT8 | Phospholipid phosphatase-related protein type 2 (Inactive phospholipid phosphatase PLPPR2) (Lipid phosphate phosphatase-related protein type 2) (Plasticity-related gene 4 protein) (PRG-4) | 389 |
| RGS2 | Q0P5H5 | Regulator of G-protein signaling 2 (RGS2) | 211 |
| ASPM | P62285 | Abnormal spindle-like microcephaly-associated protein homolog | 3371 |
| LHX9 | A0JNI8 | LIM/homeobox protein Lhx9 (LIM homeobox protein 9) | 397 |
| PKP1 | Q28161 | Plakophilin-1 (Band-6 protein) (B6P) | 727 |
| GPR37L1 | Q17QD8 | G-protein coupled receptor 37-like 1 (Endothelin B receptor-like protein 2) (ETBR-LP-2) | 482 |
| KLHL12 | E1B932 | Kelch-like protein 12 | 568 |
| CHI3L1 | P30922 | Chitinase-3-like protein 1 (39 kDa whey protein) (Cartilage glycoprotein 39) (CGP-39) (GP-39) (Chitinase-like protein 1) (CLP-1) (SPC-40) (Signal-processing protein) | 383 |
| FMOD | P13605 | Fibromodulin (FM) (Collagen-binding 59 kDa protein) (Keratan sulfate proteoglycan fibromodulin) (KSPG fibromodulin) | 376 |
| ATP2B4 | D3K0R6 | Plasma membrane calcium-transporting ATPase 4 (PMCA4) (EC 7.2.2.10) | 1207 |
| SNRPE | A4FUI2 | Small nuclear ribonucleoprotein E (snRNP-E) (Sm protein E) (Sm-E) (SmE) | 92 |
| NUDC | Q17QG2 | Nuclear migration protein nudC (Nuclear distribution protein C homolog) | 332 |
